# Supplementary material
Source: PubMed Central journal article supplement (PMC2685336)
Supplement: 01095.2008_1.pdf [file 01095.2008_1.pdf]

**Supplementary Table 1. Differentially expressed genes in the aortic wall of B6.apoE<sup>-/-</sup> and C3H.apoE<sup>-/-</sup> mice fed a chow diet.**

| Affymetrix Probe Set ID | CC Signal Intensity | CC Detection p-value | Detection Call | BC Signal Intensity | BC Detection p-value | Detection Call | Signal Difference | Fold Change   | BC vs CC Change p-value | Gene Symbol  | Gene Name                                                                                                                                       |
|-------------------------|---------------------|----------------------|----------------|---------------------|----------------------|----------------|-------------------|---------------|-------------------------|--------------|-------------------------------------------------------------------------------------------------------------------------------------------------|
| <b>1449071_at</b>       | <b>11.50</b>        | <b>0.976074</b>      | <b>A</b>       | <b>2820.00</b>      | <b>0.000244</b>      | <b>P</b>       | <b>2808.50</b>    | <b>194.01</b> | <b>0.000020</b>         | <b>MyI7</b>  | <b>myosin light chain, regulatory A</b>                                                                                                         |
| 1424967_x_at            | 10.20               | 0.962402             | A              | 2336.60             | 0.000244             | P              | 2326.40           | 181.02        | 0.000020                | Tnnt2        | troponin T2, cardiac                                                                                                                            |
| 1448554_s_at            | 14.30               | 0.95166A             | A              | 2582.40             | 0.000244             | P              | 2568.10           | 157.59        | 0.000020                | Myh7         | myosin, heavy polypeptide 7, cardiac muscle, beta                                                                                               |
| 1420884_at              | 16.70               | 0.828613             | A              | 2235.60             | 0.000244             | P              | 2218.90           | 103.97        | 0.000020                | Sln          | RIKEN cDNA 2310045A07 gene                                                                                                                      |
| 1427054_s_at            | 4.20                | 0.962402             | A              | 308.70              | 0.002930             | P              | 304.50            | 73.52         | 0.000214                | Abi3bp       | expressed sequence AI506287                                                                                                                     |
| <b>1422580_at</b>       | <b>23.70</b>        | <b>0.932373</b>      | <b>A</b>       | <b>1577.10</b>      | <b>0.001953</b>      | <b>P</b>       | <b>1553.40</b>    | <b>59.71</b>  | <b>0.000052</b>         | <b>MyI4</b>  | <b>myosin light chain, alkali, cardiac atria</b>                                                                                                |
| 1423858_a_at            | 13.30               | 0.943848             | A              | 345.20              | 0.000244             | P              | 331.90            | 45.25         | 0.000030                | Hmgcs2       | 3-hydroxy-3-methylglutaryl-Coenzyme A synthase 2                                                                                                |
| 1421144_at              | 29.40               | 0.665527             | A              | 2331.80             | 0.000732             | P              | 2302.40           | 36.76         | 0.000035                | Rpgrip1      | retinitis pigmentosa GTPase regulator interacting protein 1                                                                                     |
| 1426622_a_at            | 6.80                | 0.976074             | A              | 275.50              | 0.018555             | P              | 268.70            | 36.76         | 0.000438                | LOC639942    |                                                                                                                                                 |
| <b>1448826_at</b>       | <b>78.90</b>        | <b>0.334473</b>      | <b>A</b>       | <b>2439.10</b>      | <b>0.000244</b>      | <b>P</b>       | <b>2360.20</b>    | <b>32.00</b>  | <b>0.000020</b>         | <b>Myh6</b>  | <b>myosin heavy chain, cardiac muscle, adult</b>                                                                                                |
| 1455899_x_at            | 6.20                | 0.953857             | A              | 152.70              | 0.023926             | P              | 146.50            | 32.00         | 0.000618                | Socs3        | suppressor of cytokine signaling 3                                                                                                              |
| 1418230_a_at            | 6.90                | 0.919434             | A              | 275.10              | 0.008057             | P              | 268.20            | 29.86         | 0.000307                | Lims1        | LIM and senescent cell antigen-like domains 1                                                                                                   |
| 1420471_at              | 8.70                | 0.976074             | A              | 279.70              | 0.001953             | P              | 271.00            | 29.86         | 0.001077                | Hcrt         | hypocretin                                                                                                                                      |
| <b>1415927_at</b>       | <b>121.00</b>       | <b>0.219482</b>      | <b>A</b>       | <b>4132.70</b>      | <b>0.000244</b>      | <b>P</b>       | <b>4011.70</b>    | <b>25.99</b>  | <b>0.000020</b>         | <b>Actc1</b> | <b>actin, alpha, cardiac</b>                                                                                                                    |
| 1416852_a_at            | 9.70                | 0.981445             | A              | 270.30              | 0.046143             | P              | 260.60            | 25.99         | 0.000618                | Ncdn         | neurochondrin                                                                                                                                   |
| 1417535_at              | 7.60                | 0.99585A             | A              | 221.30              | 0.018555             | P              | 213.70            | 25.99         | 0.000020                | Fbxo25       | F-box only protein 25                                                                                                                           |
| 1419286_s_at            | 8.00                | 0.828613             | A              | 242.80              | 0.004150             | P              | 234.80            | 25.99         | 0.000438                | Iff81        | carnitine deficiency-associated gene expressed in ventricle 1                                                                                   |
| 1418095_at              | 9.20                | 0.981445             | A              | 278.70              | 0.004150             | P              | 269.50            | 24.25         | 0.000027                | Smpx         | small muscle protein, X-linked                                                                                                                  |
| <b>1422536_at</b>       | <b>52.00</b>        | <b>0.665527</b>      | <b>A</b>       | <b>1420.00</b>      | <b>0.000244</b>      | <b>P</b>       | <b>1368.00</b>    | <b>24.25</b>  | <b>0.000020</b>         | <b>Tnni3</b> | <b>troponin I, cardiac</b>                                                                                                                      |
| 1448876_at              | 13.90               | 0.888428             | A              | 229.10              | 0.056152             | M              | 215.20            | 22.63         | 0.002250                | Evc          | Ellis van Creveld gene homolog (human)                                                                                                          |
| 1449813_at              | 9.80                | 0.994141             | A              | 322.60              | 0.005859             | P              | 312.80            | 22.63         | 0.000035                | Zfp30        | zinc finger protein 30                                                                                                                          |
| 1452063_at              | 12.90               | 0.601074             | A              | 221.50              | 0.000244             | P              | 208.60            | 22.63         | 0.000774                | Rik          | 2410081M15                                                                                                                                      |
| 1452190_at              | 25.70               | 0.753906             | A              | 298.90              | 0.056152             | M              | 273.20            | 22.63         | 0.000273                | Prpc         | RIKEN cDNA 2510048K03 gene                                                                                                                      |
| 1427592_at              | 11.30               | 0.850342             | A              | 373.60              | 0.037598             | P              | 362.30            | 21.11         | 0.000101                | Pcdh7        | protocadherin 7                                                                                                                                 |
| 1427679_at              | 6.50                | 0.976074             | A              | 210.00              | 0.005859             | P              | 203.50            | 21.11         | 0.002753                | Lats1        | large tumor suppressor                                                                                                                          |
| 1429786_a_at            | 5.90                | 0.780518             | A              | 274.00              | 0.004150             | P              | 268.10            | 21.11         | 0.001077                | Zwint        | DNA segment, Chr 10, ERATO Doi 749, expressed                                                                                                   |
| 1460629_at              | 8.20                | 0.850342             | A              | 224.50              | 0.000244             | P              | 216.30            | 21.11         | 0.000865                | Trim16       | tripartite motif protein 16                                                                                                                     |
| 1419197_x_at            | 7.50                | 0.466064             | A              | 430.90              | 0.010742             | P              | 423.40            | 19.70         | 0.000078                | Hamp1        | hepcidin antimicrobial peptide                                                                                                                  |
| 1420992_at              | 15.50               | 0.904785             | A              | 490.30              | 0.000732             | P              | 474.80            | 19.70         | 0.000023                | Ankrd1       | cardiac responsive adriamycin protein                                                                                                           |
| 1448902_at              | 10.50               | 0.991943             | A              | 174.20              | 0.046143             | P              | 163.70            | 19.70         | 0.000389                | Tlc23        | RIKEN cDNA 1600012K10 gene                                                                                                                      |
| 1448994_at              | 9.10                | 0.943848             | A              | 175.80              | 0.010742             | P              | 166.70            | 19.70         | 0.001486                | Sp1          | trans-acting transcription factor 1                                                                                                             |
| 1451683_x_at            | 6.60                | 0.981445             | A              | 221.50              | 0.017822             | P              | 214.90            | 19.70         | 0.001201                | H2-D1        | histocompatibility 2, L region                                                                                                                  |
| 1423224_at              | 8.80                | 0.850342             | A              | 152.00              | 0.008057             | P              | 143.20            | 18.38         | 0.001832                | Rik          | 4432405B04                                                                                                                                      |
| 1456062_at              | 24.90               | 0.5A                 | A              | 548.70              | 0.000732             | P              | 523.80            | 18.38         | 0.000046                | Nppa         | ESTs, Highly similar to ANF_MOUSE Atrial natriuretic factor precursor (ANF) (Atrial natriuretic peptide) (ANP) (Prepronatriocidin) [M.musculus] |
| 1415745_a_at            | 23.90               | 0.828613             | A              | 313.10              | 0.030273             | P              | 289.20            | 17.15         | 0.000307                | Dscr3        | Down syndrome critical region gene 3                                                                                                            |
| 1418585_at              | 9.00                | 0.976074             | A              | 135.00              | 0.023926             | P              | 126.00            | 17.15         | 0.002753                | Ccnh         | cyclin H                                                                                                                                        |
| 1416205_at              | 33.40               | 0.753906             | A              | 285.20              | 0.008057             | P              | 251.80            | 16.00         | 0.001201                | Glb1         | galactosidase, beta 1                                                                                                                           |
| 1419184_a_at            | 10.80               | 0.967773             | A              | 267.60              | 0.030273             | P              | 256.80            | 16.00         | 0.000618                | Fhl2         | four and a half LIM domains 2                                                                                                                   |
| 1438248_at              | 9.60                | 0.95166A             | A              | 153.10              | 0.010742             | P              | 143.50            | 16.00         | 0.000189                | Pcsk5        | proprotein convertase subtilisin/kexin type 5                                                                                                   |
| 1460318_at              | 129.40              | 0.72583A             | A              | 1075.40             | 0.014160             | P              | 946.00            | 16.00         | 0.000023                | Csrp3        | cysteine-rich protein 3                                                                                                                         |
| 1417607_at              | 25.90               | 0.567627             | A              | 954.90              | 0.005859             | P              | 929.00            | 13.93         | 0.000774                | Cox6a2       | cytochrome c oxidase, subunit VI a, polypeptide 2                                                                                               |
| 1418533_s_at            | 21.40               | 0.870361             | A              | 385.20              | 0.005859             | P              | 363.80            | 13.93         | 0.000114                | Fzd2         | frizzled homolog 2 (Drosophila)                                                                                                                 |
| 1419505_a_at            | 26.00               | 0.870361             | A              | 253.40              | 0.046143             | P              | 227.40            | 13.93         | 0.002753                | Gggs1        | geranylgeranyl diphosphate synthase 1                                                                                                           |
| 1426306_a_at            | 8.60                | 0.953857             | A              | 286.90              | 0.018555             | P              | 278.30            | 13.93         | 0.000865                | Maged2       | melanoma antigen, family D, 2                                                                                                                   |
| 1427580_a_at            | 13.50               | 0.99585A             | A              | 229.10              | 0.046143             | P              | 215.60            | 13.93         | 0.004481                | Rian         | RNA imprinted and accumulated in nucleus                                                                                                        |
| 1428722_at              | 20.00               | 0.533936             | A              | 551.60              | 0.010498             | P              | 531.60            | 13.93         | 0.000147                | Ckmt2        | creatine kinase, mitochondrial 2                                                                                                                |
| 1452261_at              | 4.80                | 0.780518             | A              | 254.80              | 0.018555             | P              | 250.00            | 13.93         | 0.003355                | Shprh        | hypothetical protein LOC215776                                                                                                                  |
| 1420534_at              | 63.50               | 0.432373             | A              | 882.90              | 0.000244             | P              | 819.40            | 13.00         | 0.000020                | Gucy1a3      |                                                                                                                                                 |
| 1421239_at              | 30.50               | 0.633789             | A              | 349.60              | 0.000244             | P              | 319.10            | 13.00         | 0.000189                | Il6st        | interleukin 6 signal transducer                                                                                                                 |
| 1435258_at              | 6.40                | 0.80542              | A              | 258.30              | 0.030273             | P              | 251.90            | 13.00         | 0.001201                | Tmem141      | DNA segment, Chr 2, ERATO Doi 217, expressed                                                                                                    |
| 1416935_at              | 10.30               | 0.888428             | A              | 159.10              | 0.014160             | P              | 148.80            | 12.13         | 0.001832                | Trpv2        | transient receptor potential cation channel, subfamily V, member 2                                                                              |
| 1421898_a_at            | 31.40               | 0.780518             | A              | 246.70              | 0.037598             | P              | 215.30            | 12.13         | 0.001486                | Mr1          | histocompatibility-2 complex class 1-like sequence                                                                                              |
| 1421990_at              | 6.40                | 0.943848             | A              | 156.00              | 0.056152             | M              | 149.60            | 12.13         | 0.003041                | Syt1         | synaptotagmin 1                                                                                                                                 |
| 1424105_a_at            | 89.80               | 0.828613             | A              | 771.10              | 0.002930             | P              | 681.30            | 12.13         | 0.000035                | Pttg1        | pituitary tumor-transforming 1                                                                                                                  |
| 1450243_a_at            | 6.80                | 0.5A                 | A              | 467.20              | 0.000244             | P              | 460.40            | 12.13         | 0.000046                | Dscr11       | Down syndrome critical region gene 1-like 1                                                                                                     |
| 1426596_a_at            | 18.50               | 0.976074             | A              | 187.90              | 0.014160             | P              | 169.40            | 11.31         | 0.000552                | Smn1         | survival motor neuron                                                                                                                           |
| 1426684_at              | 6.60                | 0.753906             | A              | 208.80              | 0.046143             | P              | 202.20            | 11.31         | 0.001201                | Cnot6        | expressed sequence AW456442                                                                                                                     |
| 1436859_at              | 17.50               | 0.962402             | A              | 176.80              | 0.046143             | P              | 159.30            | 11.31         | 0.002032                | Rik          | 2700007P21                                                                                                                                      |
| 1438225_x_at            | 9.90                | 0.80542              | A              | 179.60              | 0.018555             | P              | 169.70            | 11.31         | 0.000389                | Tram1        | RIKEN cDNA 1810049E02 gene                                                                                                                      |
| 1438390_s_at            | 293.20              | 0.080566             | A              | 3876.50             | 0.001953             | P              | 3583.30           | 11.31         | 0.000088                | Pttg1        | pituitary tumor-transforming 1                                                                                                                  |
| 1450029_s_at            | 24.30               | 0.72583A             | A              | 236.80              | 0.014160             | P              | 212.50            | 11.31         | 0.000307                | Itga9        | integrin alpha 9                                                                                                                                |
| 1453369_a_at            | 13.30               | 0.80542              | A              | 361.20              | 0.014160             | P              | 347.90            | 11.31         | 0.000774                | Fundc1       | RIKEN cDNA 1500005J14 gene                                                                                                                      |
| 1460332_at              | 60.60               | 0.5A                 | A              | 429.30              | 0.001953             | P              | 368.70            | 11.31         | 0.000130                | Pln          | phospholamban                                                                                                                                   |
| 1423045_at              | 39.30               | 0.432373             | A              | 310.30              | 0.000244             | P              | 271.00            | 10.56         | 0.002032                | Ncbp2        | nuclear cap binding protein subunit 2                                                                                                           |
| 1428133_at              | 9.70                | 0.888428             | A              | 222.40              | 0.014160             | P              | 212.70            | 10.56         | 0.001651                | Snip1        | RIKEN cDNA 2410133M08 gene                                                                                                                      |
| 1438651_a_at            | 30.70               | 0.828613             | A              | 290.90              | 0.056152             | M              | 260.20            | 10.56         | 0.002490                | Agtr1        | angiotensin receptor-like 1                                                                                                                     |
| 1447462_at              | 5.80                | 0.98584              | A              | 114.40              | 0.037598             | P              | 108.60            | 10.56         | 0.000865                | D7Wsu130e    | Mus musculus 16 days embryo head cDNA, RIKEN full-length enriched library, clone:C130085H20 product:unknown EST, full insert sequence.          |
| 1448069_at              | 21.90               | 0.850342             | A              | 275.70              | 0.004150             | P              | 253.80            | 10.56         | 0.002490                | Tm4sf1       | transmembrane 4 superfamily member 1                                                                                                            |
| 1422591_at              | 23.60               | 0.665527             | A              | 247.70              | 0.008057             | P              | 224.10            | 9.85          | 0.000030                | Tceb3        | transcription elongation factor B (SIII), polypeptide 3 (110kD)                                                                                 |
| 1424161_at              | 21.60               | 0.919434             | A              | 253.70              | 0.018555             | P              | 232.10            | 9.85          | 0.000035                | Ddx27        | DEAD/H (Asp-Glu-Ala-Asp/His) box polypeptide 27                                                                                                 |
| 1425027_s_at            | 6.50                | 0.822754             | A              | 250.50              | 0.008057             | P              | 244.00            | 9.85          | 0.000492                | Sft2d2       | RIKEN cDNA 2010005O13 gene                                                                                                                      |
| 1425233_at              | 177.20              | 0.111572             | A              | 1417.70             | 0.000244             | P              | 1240.50           | 9.85          | 0.000040                | Rik          | 2210407C18                                                                                                                                      |
| 1448327_at              | 31.30               | 0.932373             | A              | 182.40              | 0.005859             | P              | 151.10            | 9.85          | 0.000438                | Actn2        | RIKEN cDNA 2210407C18 gene                                                                                                                      |
| 1448747_at              | 42.80               | 0.665527             | A              | 307.30              | 0.001953             | P              | 264.50            | 9.85          | 0.002250                | Fbxo32       | actinin alpha 2                                                                                                                                 |
| <b>1450123_at</b>       | <b>15.80</b>        | <b>0.746094</b>      | <b>A</b>       | <b>280.90</b>       | <b>0.001221</b>      | <b>P</b>       | <b>265.10</b>     | <b>9.85</b>   | <b>0.000552</b>         | <b>Ryr2</b>  | <b>ryanodine receptor 2, cardiac</b>                                                                                                            |
| 1450808_at              | 7.00                | 0.980469             | A              | 155.20              | 0.037598             | P              | 148.20            | 9.85          | 0.003699                | Fpr1         | formyl peptide receptor 1                                                                                                                       |
| 1416101_a_at            | 247.10              | 0.056152             | M              | 2357.00             | 0.000244             | P              | 2109.90           | 9.19          | 0.000020                | Hist1h1c     | histone 1, H1c                                                                                                                                  |
| 1416468_at              | 21.90               | 0.665527             | A              | 223.00              | 0.054199             | M              | 201.10            | 9.19          | 0.002250                | Aldh1a1      | aldehyde dehydrogenase family 1, subfamily A1                                                                                                   |
| 1420854_at              | 710.90              | 0.067627             | A              | 8568.80             | 0.000244             | P              | 7857.90           | 9.19          | 0.000027                | Eln          | elastin                                                                                                                                         |
| <b>1421028_a_at</b>     | <b>12.30</b>        | <b>0.80542</b>       | <b>A</b>       | <b>295.00</b>       | <b>0.000244</b>      | <b>P</b>       | <b>282.70</b>     | <b>9.19</b>   | <b>0.000101</b>         | <b>Mef2c</b> | <b>myocyte enhancer factor 2C</b>                                                                                                               |
| 1423145_a_at            | 134.00              | 0.366211             | A              | 1114.80             | 0.000244             | P              | 98                |               |                         |              |                                                                                                                                                 |

|              |         |            |          |            |          |      |                    |            |                                                                                                                                                                                                                                                                |
|--------------|---------|------------|----------|------------|----------|------|--------------------|------------|----------------------------------------------------------------------------------------------------------------------------------------------------------------------------------------------------------------------------------------------------------------|
| 1425319_s_at | 24.50   | 0.969727 A | 191.00   | 0.001953 P | 166.50   | 9.19 | 0.000618 Rik       | 6530403A03 | RIKEN cDNA 6530403A03 gene                                                                                                                                                                                                                                     |
| 1434045_at   | 63.80   | 0.533936 A | 326.70   | 0.005859 P | 262.90   | 9.19 | 0.001201 Cdkn1b    |            | ESTs                                                                                                                                                                                                                                                           |
| 1451549_at   | 8.20    | 0.916016 A | 201.90   | 0.010742 P | 193.70   | 9.19 | 0.000147 BC016201  |            | similar to cyclic nucleotide-gated channel beta subunit 1                                                                                                                                                                                                      |
| 1418370_at   | 86.60   | 0.366211 A | 902.80   | 0.000244 P | 816.20   | 8.57 | 0.000068 Tnnc1     |            | <b>troponin C, cardiac/slow skeletal</b>                                                                                                                                                                                                                       |
| 1427312_at   | 8.20    | 0.932373 A | 242.80   | 0.001221 P | 234.60   | 8.57 | 0.000492 Cmya5     |            | RIKEN cDNA 2310076E16 gene                                                                                                                                                                                                                                     |
| 1438860_a_at | 28.70   | 0.696289 A | 341.00   | 0.005859 P | 312.30   | 8.57 | 0.000618 Slc44a2   |            | RIKEN cDNA 1110028E10 gene                                                                                                                                                                                                                                     |
| 1415856_at   | 70.10   | 0.5 A      | 587.40   | 0.014160 P | 517.30   | 8.00 | 0.002753 Emb       |            | embigin                                                                                                                                                                                                                                                        |
| 1417559_at   | 34.90   | 0.633789 A | 447.80   | 0.001221 P | 412.90   | 8.00 | 0.000214 Sfxn1     |            | sideroflexin 2                                                                                                                                                                                                                                                 |
| 1418726_a_at | 43.00   | 0.334473 A | 2031.10  | 0.001221 P | 1988.10  | 8.00 | 0.000035 Tnnt2     |            | <b>troponin T2, cardiac</b>                                                                                                                                                                                                                                    |
| 1415857_at   | 44.60   | 0.5 A      | 556.80   | 0.030273 P | 512.20   | 7.46 | 0.000492 Emb       |            | embigin                                                                                                                                                                                                                                                        |
| 1418454_at   | 835.50  | 0.000732 P | 6621.80  | 0.000244 P | 5786.30  | 7.46 | 0.000020 Mfap5     |            | microfibrillar associated protein 5                                                                                                                                                                                                                            |
| 1419223_a_at | 30.70   | 0.533936 A | 366.80   | 0.005859 P | 336.10   | 7.46 | 0.000692 Dtna      |            | dystrobrevin alpha                                                                                                                                                                                                                                             |
| 1420991_at   | 142.40  | 0.129639 A | 1732.00  | 0.000732 P | 1589.60  | 7.46 | 0.000030 Ankrd1    |            | cardiac responsive adriamycin protein                                                                                                                                                                                                                          |
| 1422537_a_at | 302.40  | 0.056152 M | 2287.90  | 0.000244 P | 1985.50  | 7.46 | 0.000035 Id2       |            | inhibitor of DNA binding 2                                                                                                                                                                                                                                     |
| 1425463_at   | 42.10   | 0.870361 A | 282.60   | 0.008057 P | 240.50   | 7.46 | 0.000492 Gata6     |            | GATA binding protein 6                                                                                                                                                                                                                                         |
| 1425698_a_at | 9.60    | 0.943848 A | 135.70   | 0.056152 M | 126.10   | 7.46 | 0.003041 Crebzf    |            | tyrosine kinase-associated leucine zipper protein LAZ1pII                                                                                                                                                                                                      |
| 1428500_at   | 32.30   | 0.780518 A | 258.50   | 0.046143 P | 226.20   | 7.46 | 0.000865 Rik       |            | RIKEN cDNA 2210419D22 gene                                                                                                                                                                                                                                     |
| 1455719_at   | 336.70  | 0.037598 P | 4066.60  | 0.000244 P | 3729.90  | 7.46 | 0.000020 Tubb5     |            | RIKEN cDNA B130022C14 gene                                                                                                                                                                                                                                     |
| 1426864_a_at | 416.20  | 0.008057 P | 2920.20  | 0.000244 P | 2504.00  | 6.96 | 0.000020 Ncam1     |            | neural cell adhesion molecule 1                                                                                                                                                                                                                                |
| 1449082_at   | 345.50  | 0.001221 P | 2938.30  | 0.000244 P | 2502.80  | 6.96 | 0.000020 Mfap5     |            | microfibrillar associated protein 5                                                                                                                                                                                                                            |
| 1449552_at   | 28.40   | 0.780518 A | 231.10   | 0.018555 P | 202.70   | 6.96 | 0.003699 Zfr       |            | zinc finger RNA binding protein                                                                                                                                                                                                                                |
| 1451203_at   | 445.10  | 0.005859 P | 2544.20  | 0.000244 P | 2099.10  | 6.96 | 0.000027 Mb        |            | myoglobin                                                                                                                                                                                                                                                      |
| 1454674_at   | 102.30  | 0.219482 A | 759.60   | 0.000244 P | 657.30   | 6.96 | 0.000023 Fez1      |            | Mus musculus, Similar to fasciculation and elongation protein zeta 1 (zygin I), clone MGC:19293 IMAGE:4035444, mRNA, complete cds                                                                                                                              |
| 1416020_a_at | 121.10  | 0.696289 A | 777.30   | 0.000244 P | 656.20   | 6.50 | 0.000040 Atp5g1    |            | ATP synthase, H+ transporting, mitochondrial F0 complex, subunit c (subunit 9), isoform 1                                                                                                                                                                      |
| 1418569_at   | 433.70  | 0.005859 P | 2025.00  | 0.000244 P | 1591.30  | 6.50 | 0.000023 Fblim1    |            | RIKEN cDNA 2410043F08 gene                                                                                                                                                                                                                                     |
| 1425336_x_at | 330.50  | 0.018555 P | 4885.70  | 0.001221 P | 4555.20  | 6.50 | 0.000130 H2-K1     |            | histocompatibility 2, K region                                                                                                                                                                                                                                 |
| 1451969_s_at | 96.20   | 0.432373 A | 578.50   | 0.001953 P | 482.30   | 6.50 | 0.000307 Parp3     |            | ADP-ribosyltransferase (NAD+; poly (ADP-ribose polymerase)-like 3                                                                                                                                                                                              |
| 1452345_at   | 26.10   | 0.850342 A | 345.70   | 0.030273 P | 319.60   | 6.50 | 0.001077 Lmod2     |            | leiomodulin 2 (cardiac)                                                                                                                                                                                                                                        |
| 1423110_at   | 1622.70 | 0.000244 P | 10327.10 | 0.000244 P | 8704.40  | 6.06 | 0.000020 Col1a2    |            | procollagen, type I, alpha 2                                                                                                                                                                                                                                   |
| 1425475_at   | 227.70  | 0.067627 A | 1230.60  | 0.000244 P | 1002.90  | 6.06 | 0.000020 Col4a5    |            | procollagen, type IV, alpha 5                                                                                                                                                                                                                                  |
| 1427768_s_at | 48.30   | 0.780518 A | 354.10   | 0.005859 P | 305.80   | 6.06 | 0.000618 Myl3      |            | <b>myosin light chain, alkali, cardiac ventricles</b>                                                                                                                                                                                                          |
| 1436528_at   | 55.10   | 0.828613 A | 348.10   | 0.018555 P | 293.00   | 6.06 | 0.003699 Kazald1   |            | Mus musculus 6 days neonate head cDNA, RIKEN full-length enriched library, clone:5430425E24 product:BA108L7.1 (NOVEL INSULIN-LIKE GROWTH FACTOR BINDING TYPE PROTEIN WITH KAZAL-TYPE SERINE PROTEASE INHIBITOR DOMAIN) (FRAGMENT) homolog [Homo sapiens], full |
| 1438559_x_at | 109.60  | 0.174316 A | 751.20   | 0.001465 P | 641.60   | 6.06 | 0.000044 Slc44a2   |            | RIKEN cDNA 1110028E10 gene                                                                                                                                                                                                                                     |
| 1448201_at   | 150.50  | 0.00293 P  | 914.40   | 0.000244 P | 763.90   | 6.06 | 0.000020 Sfrp2     |            | secreted frizzled-related sequence protein 2                                                                                                                                                                                                                   |
| 1417501_at   | 76.60   | 0.601074 A | 320.50   | 0.023926 P | 243.90   | 5.66 | 0.002032 Fbxo6     |            | F-box only protein 6b                                                                                                                                                                                                                                          |
| 1422286_a_at | 16.10   | 0.828613 A | 182.90   | 0.056152 M | 166.80   | 5.66 | 0.000307 Tgif1     |            | TG interacting factor                                                                                                                                                                                                                                          |
| 1425188_s_at | 33.90   | 0.696289 A | 176.80   | 0.000732 P | 142.90   | 5.66 | 0.000966 Sel1l     |            | Sel1 (suppressor of lin-12) 1 homolog (C. elegans)                                                                                                                                                                                                             |
| 1425494_s_at | 29.90   | 0.525391 A | 336.80   | 0.001221 P | 306.90   | 5.66 | 0.000046 Bmpr1a    |            | bone morphogenetic protein receptor, type 1A                                                                                                                                                                                                                   |
| 1435106_at   | 137.50  | 0.303711 A | 1050.20  | 0.000244 P | 912.70   | 5.66 | 0.000020 Rik       |            | ESTs                                                                                                                                                                                                                                                           |
| 1452777_a_at | 33.90   | 0.72583 A  | 265.00   | 0.023926 P | 231.10   | 5.66 | 0.000389 Nub1      |            | NY-REN-18 antigen                                                                                                                                                                                                                                              |
| 1421215_a_at | 206.30  | 0.046094 A | 632.90   | 0.000732 P | 426.60   | 5.28 | 0.000052 Sirmap    |            | sarcolemma associated protein                                                                                                                                                                                                                                  |
| 1421534_at   | 82.60   | 0.287627 A | 380.40   | 0.001953 P | 297.80   | 5.28 | 0.001077 Dfna5h    |            | fibroblast growth factor inducible 15                                                                                                                                                                                                                          |
| 1421860_at   | 69.40   | 0.601074 A | 423.90   | 0.030273 P | 354.50   | 5.28 | 0.000214 Cistn1    |            | calsyntenin 1                                                                                                                                                                                                                                                  |
| 1423181_s_at | 52.80   | 0.665527 A | 284.60   | 0.000244 P | 231.80   | 5.28 | 0.000030 Clns1a    |            | chloride channel, nucleotide-sensitive, 1A similar to Isopenentenyl-diphosphate delta-isomerase (IPP isomerase) (Isopenentenyl pyrophosphate isomerase)                                                                                                        |
| 1451122_at   | 32.20   | 0.850342 A | 178.30   | 0.014160 P | 146.10   | 5.28 | 0.004073 Idi1      |            | elastin                                                                                                                                                                                                                                                        |
| 1420855_at   | 3474.10 | 0.000732 P | 20402.90 | 0.000732 P | 16928.80 | 4.92 | 0.000035 Eln       |            | elastin                                                                                                                                                                                                                                                        |
| 1422485_at   | 178.30  | 0.366211 A | 730.80   | 0.010742 P | 552.50   | 4.92 | 0.000492 Smad4     |            | MAD homolog 4 (Drosophila)                                                                                                                                                                                                                                     |
| 1423049_a_at | 1021.60 | 0.001221 P | 5298.50  | 0.000732 P | 4276.90  | 4.92 | 0.000040 Tpm1      |            | <b>tropomyosin 1, alpha</b>                                                                                                                                                                                                                                    |
| 1423669_at   | 1444.40 | 0.000244 P | 9463.40  | 0.000244 P | 8019.00  | 4.92 | 0.000020 Col1a1    |            | procollagen, type I, alpha 1                                                                                                                                                                                                                                   |
| 1427034_at   | 27.00   | 0.601074 A | 272.20   | 0.030273 P | 245.20   | 4.92 | 0.001201 Ace       |            | angiotensin converting enzyme                                                                                                                                                                                                                                  |
| 1431213_a_at | 92.40   | 0.665527 A | 414.10   | 0.000732 P | 321.70   | 4.92 | 0.000020 LOC673100 |            | EG668462 /// EG668581 /// LOC433762 /// LOC670993 ///                                                                                                                                                                                                          |
| 1450786_x_at | 30.40   | 0.567627 A | 230.80   | 0.008057 P | 200.40   | 4.92 | 0.002490 LOC669660 |            | enigma homolog (R. norvegicus)                                                                                                                                                                                                                                 |
| 1450952_at   | 209.40  | 0.067627 A | 1147.50  | 0.000244 P | 938.10   | 4.92 | 0.000027 Pln       |            | phospholamban                                                                                                                                                                                                                                                  |
| 1417119_at   | 33.80   | 0.665527 A | 222.70   | 0.023926 P | 188.90   | 4.59 | 0.003699 Zfp11     |            | zinc finger like protein 1                                                                                                                                                                                                                                     |
| 1421851_at   | 547.60  | 0.001221 P | 2005.90  | 0.000244 P | 1458.30  | 4.59 | 0.000030 Mtap1b    |            | microtubule-associated protein 1 B                                                                                                                                                                                                                             |
| 1422803_at   | 82.40   | 0.601074 A | 350.80   | 0.001953 P | 268.40   | 4.59 | 0.001336 Fstl3     |            | follicle-stimulating-like 3                                                                                                                                                                                                                                    |
| 1425476_at   | 247.20  | 0.023926 P | 1044.80  | 0.001221 P | 797.60   | 4.59 | 0.000147 Col4a5    |            | procollagen, type IV, alpha 5                                                                                                                                                                                                                                  |
| 1426379_at   | 177.80  | 0.080566 A | 872.70   | 0.001221 P | 694.90   | 4.59 | 0.000189 Eif4b     |            | RIKEN cDNA 2310046H11 gene                                                                                                                                                                                                                                     |
| 1426865_a_at | 381.90  | 0.030273 P | 2085.00  | 0.001221 P | 1703.10  | 4.59 | 0.000060 Ncam1     |            | neural cell adhesion molecule 1                                                                                                                                                                                                                                |
| 1426993_at   | 96.60   | 0.334473 A | 523.40   | 0.000732 P | 426.80   | 4.59 | 0.000241 Xpr1      |            | xenotropic and polytropic retrovirus receptor 1                                                                                                                                                                                                                |
| 1431335_a_at | 224.50  | 0.00415 P  | 930.80   | 0.000244 P | 706.30   | 4.59 | 0.000130 Wfdc1     |            | WAP four-disulfide core domain 1                                                                                                                                                                                                                               |
| 1431808_a_at | 344.40  | 0.19458 A  | 2087.00  | 0.000244 P | 1742.60  | 4.59 | 0.000020 Itih4     |            | inter alpha-trypsin inhibitor, heavy chain 4                                                                                                                                                                                                                   |
| 1433496_at   | 46.80   | 0.780518 A | 195.50   | 0.037598 P | 148.70   | 4.59 | 0.000618 Gli25d1   |            | RIKEN cDNA 2810024B22 gene                                                                                                                                                                                                                                     |
| 1449141_at   | 724.40  | 0.00293 P  | 3221.10  | 0.000244 P | 2496.70  | 4.59 | 0.000030 Fblim1    |            | RIKEN cDNA 2410043F08 gene                                                                                                                                                                                                                                     |
| 1449348_at   | 84.10   | 0.466064 A | 525.90   | 0.002930 P | 441.80   | 4.59 | 0.000130 Mpp6      |            | membrane protein, palmitoylated 6 (MAGUK p55 subfamily member 6)                                                                                                                                                                                               |
| 1450803_at   | 33.20   | 0.696289 A | 313.30   | 0.001953 P | 280.10   | 4.59 | 0.003355 Ntf3      |            | neurotrophin 3                                                                                                                                                                                                                                                 |
| 1452363_a_at | 825.00  | 0.000244 P | 5252.60  | 0.000732 P | 4427.60  | 4.59 | 0.000052 Atp2a2    |            | <b>ATPase, Ca++ transporting, cardiac muscle, slow twitch 2</b>                                                                                                                                                                                                |
| 1416121_at   | 979.80  | 0.000244 P | 4472.90  | 0.000732 P | 3493.10  | 4.29 | 0.000040 Lox       |            | lysyl oxidase                                                                                                                                                                                                                                                  |
| 1416122_at   | 355.20  | 0.023926 P | 1446.80  | 0.000732 P | 1091.60  | 4.29 | 0.000020 Ccnd2     |            | cyclin D2                                                                                                                                                                                                                                                      |
| 1422437_at   | 719.80  | 0.000244 P | 4251.70  | 0.000244 P | 3531.90  | 4.29 | 0.000020 Col5a2    |            | procollagen, type V, alpha 2                                                                                                                                                                                                                                   |
| 1423274_at   | 1081.70 | 0.000732 P | 3949.90  | 0.000244 P | 2868.20  | 4.29 | 0.000052 Ints6     |            | DEAD/H (Asp-Glu-Ala-Asp/His) box polypeptide 26                                                                                                                                                                                                                |
| 1426349_s_at | 22.70   | 0.633789 A | 209.00   | 0.023926 P | 186.30   | 4.29 | 0.003699 Tmpo      |            | thymopoietin                                                                                                                                                                                                                                                   |
| 1427050_at   | 56.70   | 0.696289 A | 258.80   | 0.030273 P | 202.10   | 4.29 | 0.004073 Rik       |            | RIKEN cDNA 5730420B22 gene                                                                                                                                                                                                                                     |
| 1434831_a_at | 637.80  | 0.037598 P | 1468.90  | 0.001953 P | 831.10   | 4.29 | 0.000060 Foxo3a    |            | RIKEN cDNA 1110048B16 gene                                                                                                                                                                                                                                     |
| 1435353_a_at | 85.60   | 0.303711 A | 269.80   | 0.000244 P | 184.20   | 4.29 | 0.002250 Rik       |            | Mus musculus, Similar to phosphatidylserine decarboxylase, clone MGC:7133 IMAGE:3158145, mRNA, complete cds                                                                                                                                                    |

|              |         |            |          |            |          |      |          |                                                                                                  |                                                                                                                      |
|--------------|---------|------------|----------|------------|----------|------|----------|--------------------------------------------------------------------------------------------------|----------------------------------------------------------------------------------------------------------------------|
| 1450379_at   | 213.60  | 0.080566 A | 747.70   | 0.000244 P | 534.10   | 4.29 | 0.000020 | Msn                                                                                              | moesin                                                                                                               |
| 1450958_at   | 3804.20 | 0.000244 P | 15472.60 | 0.000244 P | 11668.40 | 4.29 | 0.000020 | Tm4sf1                                                                                           | transmembrane 4 superfamily member 1                                                                                 |
| 1452705_at   | 232.00  | 0.149658 A | 687.60   | 0.000732 P | 455.60   | 4.29 | 0.000024 | Pdxdc1                                                                                           |                                                                                                                      |
| 1416414_at   | 58.90   | 0.665527 A | 392.60   | 0.014160 P | 333.70   | 4.00 | 0.000020 | Emilin1                                                                                          | elastin microfibril interface located protein 1                                                                      |
| 1416551_at   | 2228.00 | 0.000244 P | 8744.10  | 0.000244 P | 6516.10  | 4.00 | 0.000020 | Atp2a2                                                                                           | ATPase, Ca++ transporting, cardiac muscle, slow twitch 2                                                             |
| 1416589_at   | 6910.70 | 0.000244 P | 28425.20 | 0.000244 P | 21514.50 | 4.00 | 0.000020 | Sparc                                                                                            | secreted acidic cysteine rich glycoprotein                                                                           |
| 1416666_at   | 500.60  | 0.001221 P | 2282.50  | 0.000732 P | 1781.90  | 4.00 | 0.000023 | Serpine2                                                                                         | serine (or cysteine) proteinase inhibitor, clade E, member 2                                                         |
| 1419443_at   | 30.60   | 0.696289 A | 244.60   | 0.056152 M | 214.00   | 4.00 | 0.000078 | Sap18                                                                                            | Sin3-associated polypeptide 18                                                                                       |
| 1419666_x_at | 919.10  | 0.056152 M | 2690.20  | 0.000244 P | 1771.10  | 4.00 | 0.000020 | Nupr1                                                                                            | nuclear protein 1                                                                                                    |
| 1422904_at   | 1176.70 | 0.000244 P | 5063.30  | 0.000244 P | 3886.60  | 4.00 | 0.000020 | Fmo2                                                                                             | flavin containing monooxygenase 2                                                                                    |
| 1426972_at   | 194.50  | 0.111572 A | 857.70   | 0.000244 P | 663.20   | 4.00 | 0.000023 | Sec24d                                                                                           | RIKEN cDNA 231002L09 gene                                                                                            |
| 1430388_a_at | 296.00  | 0.19458 A  | 1398.20  | 0.001221 P | 1102.20  | 4.00 | 0.000307 | Sulf2                                                                                            | sulfatase 2                                                                                                          |
| 1434479_at   | 404.30  | 0.000244 P | 1713.70  | 0.000244 P | 1309.40  | 4.00 | 0.000023 | Col5a1                                                                                           | procollagen, type V, alpha 1                                                                                         |
| 1436994_a_at | 155.90  | 0.067627 A | 418.80   | 0.002930 P | 262.90   | 4.00 | 0.000692 | Hist1h1c                                                                                         | histone 1, H1c                                                                                                       |
| 1437615_s_at | 83.10   | 0.5 A      | 510.20   | 0.018555 P | 427.10   | 4.00 | 0.004481 | Vps37c                                                                                           | expressed sequence AU042646                                                                                          |
| 1450085_at   | 87.20   | 0.753906 A | 282.40   | 0.000244 P | 195.20   | 4.00 | 0.000389 | Angptl2                                                                                          | angiopoietin-like 2                                                                                                  |
| 1450407_a_at | 171.60  | 0.018555 P | 556.00   | 0.000732 P | 384.40   | 4.00 | 0.000618 | Anp32a                                                                                           | acidic (leucine-rich) nuclear phosphoprotein 32 family, member A                                                     |
| 1450857_a_at | 4591.90 | 0.000244 P | 19125.80 | 0.000244 P | 14533.90 | 4.00 | 0.000020 | Col1a2                                                                                           | procollagen, type I, alpha 2                                                                                         |
| 1453724_a_at | 257.00  | 0.246094 A | 1403.10  | 0.004150 P | 1146.10  | 4.00 | 0.000130 | Serpinf1                                                                                         | member 1                                                                                                             |
| 1455494_at   | 715.70  | 0.023926 P | 4938.70  | 0.000244 P | 4223.00  | 4.00 | 0.000020 | Col1a1                                                                                           | procollagen, type I, alpha 1                                                                                         |
| 1418532_at   | 130.70  | 0.129639 A | 490.40   | 0.001221 P | 359.70   | 3.73 | 0.000241 | Fzd2                                                                                             | frizzled homolog 2 (Drosophila)                                                                                      |
| 1419662_at   | 1587.30 | 0.000244 P | 5889.30  | 0.000244 P | 4302.00  | 3.73 | 0.000027 | Ogn                                                                                              | osteolectin                                                                                                          |
| 1419663_at   | 1655.40 | 0.000244 P | 5021.50  | 0.000244 P | 3366.10  | 3.73 | 0.000020 | Ogn                                                                                              | osteolectin                                                                                                          |
| 1419665_a_at | 925.20  | 0.01416 P  | 3360.30  | 0.000244 P | 2435.10  | 3.73 | 0.000030 | Nupr1                                                                                            | nuclear protein 1                                                                                                    |
| 1422644_at   | 339.00  | 0.00293 P  | 1184.80  | 0.000244 P | 845.80   | 3.73 | 0.000020 | Sh3bgr                                                                                           | SH3-binding domain glutamic acid-rich protein                                                                        |
| 1423359_at   | 235.60  | 0.010742 P | 930.60   | 0.000244 P | 695.00   | 3.73 | 0.000078 | Pln                                                                                              | phospholamban                                                                                                        |
| 1423586_at   | 325.10  | 0.067627 A | 1473.90  | 0.000732 P | 1148.80  | 3.73 | 0.000020 | Axl                                                                                              | AXL receptor tyrosine kinase                                                                                         |
| 1424927_at   | 56.00   | 0.533936 A | 389.80   | 0.001221 P | 333.80   | 3.73 | 0.000052 | Glipr1                                                                                           | GLI pathogenesis-related 1 (glioma)                                                                                  |
| 1425273_s_at | 60.40   | 0.533936 A | 233.80   | 0.010742 P | 173.40   | 3.73 | 0.000774 | Emp2                                                                                             | epithelial membrane protein 2                                                                                        |
| 1426555_at   | 1001.10 | 0.000244 P | 3144.20  | 0.000244 P | 2143.10  | 3.73 | 0.000040 | Scsep1                                                                                           | retinoid-inducible serine carboxypeptidase                                                                           |
| 1427471_at   | 25.80   | 0.601074 A | 189.20   | 0.002930 P | 163.40   | 3.73 | 0.002753 | Fbxl3                                                                                            | F-box and leucine-rich repeat protein 3a                                                                             |
| 1427489_at   | 688.00  | 0.000244 P | 2624.10  | 0.000244 P | 1936.10  | 3.73 | 0.000020 | Itga8                                                                                            | integrin alpha 8                                                                                                     |
| 1427883_a_at | 6146.60 | 0.000244 P | 21321.10 | 0.000244 P | 15174.50 | 3.73 | 0.000020 | Col3a1                                                                                           | procollagen, type III, alpha 1                                                                                       |
| 1438009_at   | 147.10  | 0.633789 A | 385.50   | 0.005859 P | 238.40   | 3.73 | 0.000023 | RP23-480B19.10                                                                                   | Mus musculus 18-day embryo whole body cDNA, RIKEN full-length enriched library, clone:1190022L06 product:HISTONE H2A |
| 1448169_at   | 118.20  | 0.5 A      | 672.50   | 0.023926 P | 554.30   | 3.73 | 0.000046 | Krt18                                                                                            | keratin complex 1, acidic, gene 18                                                                                   |
| 1448400_a_at | 61.60   | 0.326416 A | 388.20   | 0.001221 P | 326.60   | 3.73 | 0.001077 | Smarcd2                                                                                          | SWI/SNF related, matrix associated, actin dependent regulator of chromatin, subfamily d, member 2                    |
| 1448720_at   | 68.90   | 0.753906 A | 228.40   | 0.004150 P | 159.50   | 3.73 | 0.000273 | Lrrc40                                                                                           | RIKEN cDNA 2610040E16 gene                                                                                           |
| 1450843_a_at | 541.70  | 0.000732 P | 1727.50  | 0.000244 P | 1185.80  | 3.73 | 0.000060 | Serpinh1                                                                                         | serine (or cysteine) proteinase inhibitor, clade H, member 1                                                         |
| 1450928_at   | 54.80   | 0.533936 A | 232.70   | 0.037598 P | 177.90   | 3.73 | 0.000307 | Id4                                                                                              | inhibitor of DNA binding 4                                                                                           |
| 1452106_at   | 141.30  | 0.129639 A | 1190.80  | 0.000244 P | 1049.50  | 3.73 | 0.000020 | Npnt                                                                                             |                                                                                                                      |
| 1416271_at   | 121.70  | 0.037598 P | 598.30   | 0.000244 P | 476.60   | 3.48 | 0.000088 | Perp                                                                                             | p53 apoptosis effector related to Pmp22                                                                              |
| 1416455_a_at | 219.60  | 0.067627 A | 1044.90  | 0.004150 P | 825.30   | 3.48 | 0.000060 | Cryab                                                                                            | crystallin, alpha B                                                                                                  |
| 1417012_at   | 74.20   | 0.533936 A | 550.00   | 0.030273 P | 475.80   | 3.48 | 0.003041 | Sdc2                                                                                             | syndecan 2                                                                                                           |
| 1418769_at   | 367.50  | 0.080566 A | 1058.30  | 0.000244 P | 690.80   | 3.48 | 0.000088 | Myoz2                                                                                            | myozenin 2                                                                                                           |
| 1419098_at   | 184.80  | 0.037598 P | 614.20   | 0.000244 P | 429.40   | 3.48 | 0.000068 | Stom                                                                                             | erythrocyte protein band 7.2                                                                                         |
| 1424010_at   | 613.60  | 0.010742 P | 3905.00  | 0.000244 P | 3291.40  | 3.48 | 0.000023 | Mfap4                                                                                            | RIKEN cDNA 1110007F23 gene                                                                                           |
| 1424131_at   | 668.20  | 0.000244 P | 2471.30  | 0.000244 P | 1803.10  | 3.48 | 0.000020 | Col6a3 /// LOC674521                                                                             | procollagen, type VI, alpha 3                                                                                        |
| 1424187_at   | 251.20  | 0.27417 A  | 764.20   | 0.000732 P | 513.00   | 3.48 | 0.000030 | Ccdc80                                                                                           | steroid sensitive gene 1                                                                                             |
| 1425472_a_at | 203.90  | 0.01416 P  | 961.20   | 0.000732 P | 757.30   | 3.48 | 0.000130 | Lmna                                                                                             | lamin A                                                                                                              |
| 1427168_a_at | 225.70  | 0.030273 P | 614.10   | 0.001953 P | 388.40   | 3.48 | 0.000966 | Col14a1                                                                                          | procollagen, type XIV, alpha 1                                                                                       |
| 1427884_at   | 186.20  | 0.023926 P | 791.10   | 0.000244 P | 604.90   | 3.48 | 0.001336 | Col3a1                                                                                           | procollagen, type III, alpha 1                                                                                       |
| 1432462_a_at | 70.80   | 0.334473 A | 334.10   | 0.002930 P | 263.30   | 3.48 | 0.000618 | Crsp8                                                                                            | RIKEN cDNA 1500015J03 gene                                                                                           |
| 1448228_at   | 297.50  | 0.080566 A | 2291.80  | 0.000244 P | 1994.30  | 3.48 | 0.000020 | Lox                                                                                              | lysyl oxidase                                                                                                        |
| 1448259_at   | 1882.50 | 0.000244 P | 6590.60  | 0.000244 P | 4708.10  | 3.48 | 0.000020 | Fstl1                                                                                            | folistatin-like                                                                                                      |
| 1449350_at   | 380.40  | 0.023926 P | 1669.50  | 0.000244 P | 1289.10  | 3.48 | 0.000027 | Osr1                                                                                             | odd-skipped related 1 (Drosophila)                                                                                   |
| 1449531_at   | 101.00  | 0.27417 A  | 406.60   | 0.010742 P | 305.60   | 3.48 | 0.000389 | Leprel2                                                                                          | gene rich cluster, B gene                                                                                            |
| 1450179_at   | 219.40  | 0.334473 A | 553.90   | 0.000244 P | 334.50   | 3.48 | 0.000214 | Sost                                                                                             | sclerostin                                                                                                           |
| 1450941_at   | 25.70   | 0.466064 A | 295.90   | 0.010742 P | 270.20   | 3.48 | 0.002032 | ---                                                                                              | syndecan binding protein                                                                                             |
| 1451527_at   | 155.50  | 0.046143 P | 813.00   | 0.000732 P | 657.50   | 3.48 | 0.000046 | Pcolce2                                                                                          | procollagen C-endopeptidase enhancer 2                                                                               |
| 1452183_a_at | 212.70  | 0.149658 A | 772.50   | 0.000244 P | 559.80   | 3.48 | 0.000020 | Gli2                                                                                             | maternally expressed gene 3                                                                                          |
| 1452418_at   | 6198.30 | 0.000244 P | 22570.10 | 0.000244 P | 16371.80 | 3.48 | 0.000020 | 1200016E24 Rik                                                                                   | RIKEN cDNA 1200016E24 gene                                                                                           |
| 1452540_a_at | 649.50  | 0.001953 P | 2967.00  | 0.000244 P | 2317.50  | 3.48 | 0.000052 | Hist1h2bc /// Hist1h2be /// Hist1h2bl /// Hist1h2bm /// Hist1h2bp /// LOC665622 /// RP23-38E20.1 | histone 1, H2bc                                                                                                      |
| 1454677_at   | 1034.30 | 0.000244 P | 4122.10  | 0.000244 P | 3087.80  | 3.48 | 0.000035 | Timp2                                                                                            | tissue inhibitor of metalloproteinase 2                                                                              |
| 1415871_at   | 236.70  | 0.023926 P | 508.60   | 0.000732 P | 271.90   | 3.25 | 0.001651 | Tgfb1                                                                                            | transforming growth factor, beta induced, 68 kDa                                                                     |
| 1417491_at   | 149.90  | 0.219482 A | 419.90   | 0.001953 P | 270.00   | 3.25 | 0.002250 | Ctsb                                                                                             | cathepsin B                                                                                                          |
| 1417928_at   | 168.30  | 0.398926 A | 571.40   | 0.000732 P | 403.10   | 3.25 | 0.000020 | Pdim4                                                                                            | reversion induced LIM gene                                                                                           |
| 1418538_at   | 240.60  | 0.27417 A  | 750.00   | 0.001953 P | 509.40   | 3.25 | 0.001486 | Kdelr3                                                                                           | expressed sequence AI173274                                                                                          |
| 1420408_a_at | 208.90  | 0.018555 P | 873.60   | 0.001221 P | 664.70   | 3.25 | 0.000147 | Abcc9                                                                                            | ATP-binding cassette, sub-family C (CFTR/MRP), member 9                                                              |
| 1420478_at   | 379.90  | 0.037598 P | 993.60   | 0.001953 P | 613.70   | 3.25 | 0.000068 | Nap111                                                                                           | nucleosome assembly protein 1-like 1                                                                                 |
| 1420533_at   | 207.40  | 0.19458 A  | 605.40   | 0.000732 P | 398.00   | 3.25 | 0.000130 | Gucy1a3                                                                                          | guanylate cyclase 1, soluble, alpha 3                                                                                |
| 1421733_a_at | 208.80  | 0.046143 P | 669.10   | 0.000244 P | 460.30   | 3.25 | 0.000023 | Tpsti1                                                                                           | protein-tyrosine sulfotransferase 1                                                                                  |
| 1421871_at   | 439.50  | 0.00293 P  | 1262.40  | 0.001221 P | 822.90   | 3.25 | 0.000088 | Sh3bgrl                                                                                          | SH3-binding domain glutamic acid-rich protein like                                                                   |
| 1421917_at   | 58.80   | 0.466064 A | 274.20   | 0.000732 P | 215.40   | 3.25 | 0.001486 | Pdgfra                                                                                           | platelet derived growth factor receptor, alpha polypeptide                                                           |
| 1423854_a_at | 372.00  | 0.19458 A  | 946.80   | 0.000244 P | 574.80   | 3.25 | 0.000167 | Rasi11b                                                                                          | RIKEN cDNA 1190017B18 gene                                                                                           |
| 1425896_a_at | 304.50  | 0.01416 P  | 1241.40  | 0.000244 P | 936.90   | 3.25 | 0.000020 | Fbn1                                                                                             | fibrillin 1                                                                                                          |
| 1426301_at   | 64.20   | 0.567627 A | 287.30   | 0.018555 P | 223.10   | 3.25 | 0.000273 | Alcam                                                                                            | activated leukocyte cell adhesion molecule                                                                           |
| 1428309_s_at | 56.80   | 0.753906 A | 253.50   | 0.014160 P | 196.70   | 3.25 | 0.000214 | Pdrg1                                                                                            | RIKEN cDNA 1110004D19 gene                                                                                           |
| 1434931_at   | 87.90   | 0.27417 A  | 589.60   | 0.005371 P | 501.70   | 3.25 | 0.001336 | Neo1                                                                                             | neogenin                                                                                                             |
| 1435148_at   | 184.00  | 0.398926 A | 764.90   | 0.018555 P | 580.90   | 3.25 | 0.000068 | Atp1b2                                                                                           | ATPase, Na+/K+ transporting, beta 2 polypeptide                                                                      |
| 1448321_at   | 864.00  | 0.001221 P | 2286.30  | 0.000732 P | 1422.30  | 3.25 | 0.000030 | Smoc1                                                                                            | SPARC related modular calcium binding 1                                                                              |
| 1448754_at   | 1502.10 | 0.000244 P | 4643.40  | 0.000244 P | 3141.30  | 3.25 | 0.000020 | Rbp1                                                                                             | retinol binding protein 1, cellular                                                                                  |
| 1450040_at   | 226.70  | 0.286602 A | 1116.70  | 0.056152 M | 890.00   | 3.25 | 0.000088 | Timp2                                                                                            | tissue inhibitor of metalloproteinase 2                                                                              |
| 1451119_a_at | 85.10   | 0.398926 A | 242.90   | 0.023926 P | 157.80   | 3.25 | 0.000865 | Fbln1                                                                                            | fibrulin 1                                                                                                           |
| 1452295_at   | 62.50   | 0.5 A      | 248.20   | 0.005859 P | 185.70   | 3.25 | 0.000040 | Tmepai                                                                                           | Nedd4 WW binding protein 4                                                                                           |

|              |         |          |   |          |          |   |          |      |          |             |                                                                                                                                       |
|--------------|---------|----------|---|----------|----------|---|----------|------|----------|-------------|---------------------------------------------------------------------------------------------------------------------------------------|
| 1454043_a_at | 90.20   | 0.432373 | A | 331.80   | 0.030273 | P | 241.60   | 3.25 | 0.000346 | Kcnab1      | potassium voltage-gated channel, shaker-related subfamily, beta member 1                                                              |
| 1454696_at   | 1208.30 | 0.000244 | P | 3902.50  | 0.000244 | P | 2694.20  | 3.25 | 0.000020 | Gnb1        | guanine nucleotide binding protein, beta 1                                                                                            |
| 1460208_at   | 526.50  | 0.000732 | P | 1835.20  | 0.001221 | P | 1308.70  | 3.25 | 0.000101 | Fbn1        | fibrillin 1                                                                                                                           |
| 1416652_at   | 89.30   | 0.246094 | A | 323.30   | 0.010742 | P | 234.00   | 3.03 | 0.001201 | Aspn        | asporin                                                                                                                               |
| 1416749_at   | 1059.40 | 0.005859 | P | 1749.50  | 0.000244 | P | 690.10   | 3.03 | 0.000020 | Htra1       | protease, serine, 11 (Igf binding)                                                                                                    |
| 1416803_at   | 232.20  | 0.080566 | A | 494.90   | 0.000732 | P | 262.70   | 3.03 | 0.000774 | Fkbp7       | FK506 binding protein 7                                                                                                               |
| 1417533_a_at | 1266.90 | 0.000732 | P | 2723.30  | 0.000244 | P | 1456.40  | 3.03 | 0.000101 | Itgb5       | integrin beta 5                                                                                                                       |
| 1417534_at   | 455.40  | 0.149658 | A | 1487.30  | 0.008057 | P | 1031.90  | 3.03 | 0.000214 | Itgb5       | integrin beta 5                                                                                                                       |
| 1417644_at   | 205.40  | 0.171387 | A | 699.80   | 0.000244 | P | 494.40   | 3.03 | 0.000078 | Sspn        | sarcospan                                                                                                                             |
| 1418509_at   | 1110.20 | 0.001953 | P | 3502.80  | 0.000244 | P | 2392.60  | 3.03 | 0.000023 | Cbr2        | carbonyl reductase 2                                                                                                                  |
| 1418697_at   | 213.10  | 0.023926 | P | 954.80   | 0.000732 | P | 741.70   | 3.03 | 0.000020 | Inmt        | thioether S-methyltransferase                                                                                                         |
| 1418981_at   | 396.80  | 0.000244 | P | 1341.30  | 0.000732 | P | 944.50   | 3.03 | 0.000078 | Casp12      | caspase 12                                                                                                                            |
| 1419259_at   | 773.10  | 0.001221 | P | 1740.20  | 0.000244 | P | 967.10   | 3.03 | 0.000020 | Rsu1        | Ras suppressor protein 1                                                                                                              |
| 1420731_a_at | 1445.00 | 0.000244 | P | 4425.50  | 0.000244 | P | 2980.50  | 3.03 | 0.000020 | Csrp2       | cysteine-rich protein 2                                                                                                               |
| 1420924_at   | 151.70  | 0.27417  | A | 473.80   | 0.004150 | P | 322.10   | 3.03 | 0.000114 | Timp2       | tissue inhibitor of metalloproteinase 2                                                                                               |
| 1422567_at   | 172.30  | 0.149658 | A | 415.20   | 0.000244 | P | 242.90   | 3.03 | 0.000068 | Niban       | niban protein                                                                                                                         |
| 1424594_at   | 510.20  | 0.018555 | P | 1191.80  | 0.000244 | P | 681.60   | 3.03 | 0.000618 | Lgals7      | lectin, galactose binding, soluble 7                                                                                                  |
| 1425338_at   | 166.50  | 0.018555 | P | 544.10   | 0.000244 | P | 377.60   | 3.03 | 0.000101 | Plcb4       | phospholipase C, beta 4                                                                                                               |
| 1425492_at   | 250.40  | 0.037598 | P | 638.20   | 0.000244 | P | 387.80   | 3.03 | 0.000023 | Bmpr1a      | bone morphogenetic protein receptor, type 1A                                                                                          |
| 1426884_at   | 220.20  | 0.11572  | A | 620.90   | 0.000244 | P | 400.70   | 3.03 | 0.000068 | Rmnd5a      | hypothetical protein, clone MTA.D02.090                                                                                               |
| 1427735_a_at | 110.10  | 0.567627 | A | 375.80   | 0.046143 | P | 265.70   | 3.03 | 0.000389 | Acta1       | actin, alpha 1, skeletal muscle                                                                                                       |
| 1428372_at   | 825.10  | 0.005859 | P | 1560.50  | 0.000732 | P | 735.40   | 3.03 | 0.000214 | St5         | RIKEN cDNA 2010004M01 gene                                                                                                            |
| 1430127_a_at | 156.60  | 0.149658 | A | 460.50   | 0.000244 | P | 303.90   | 3.03 | 0.000052 | Cnd2        | cyclin D2                                                                                                                             |
| 1432344_a_at | 149.40  | 0.149658 | A | 497.70   | 0.000732 | P | 348.30   | 3.03 | 0.000035 | Aplp2       | amyloid beta (A4) precursor-like protein 2                                                                                            |
| 1434442_at   | 329.40  | 0.000244 | P | 952.90   | 0.000244 | P | 623.50   | 3.03 | 0.000020 | D5Erttd593e | DNA segment, Chr 5, ERATO Doi 593, expressed                                                                                          |
| 1437889_x_at | 3730.00 | 0.00293  | P | 18430.30 | 0.008057 | P | 14700.30 | 3.03 | 0.000552 | Bgn         | biglycan                                                                                                                              |
| 1448185_at   | 557.20  | 0.000732 | P | 1681.80  | 0.000244 | P | 1124.60  | 3.03 | 0.000035 | Herpud1     | homocysteine-inducible, endoplasmic reticulum stress-inducible, ubiquitin-like domain member 1                                        |
| 1448392_at   | 6552.90 | 0.000244 | P | 20139.30 | 0.000244 | P | 13586.40 | 3.03 | 0.000020 | Sparc       | secreted acidic cysteine rich glycoprotein                                                                                            |
| 1452590_a_at | 504.80  | 0.080566 | A | 1661.40  | 0.000244 | P | 1156.60  | 3.03 | 0.000027 | Plac9       | Mus musculus, clone MGC:41689                                                                                                         |
| 1415822_at   | 151.90  | 0.018555 | P | 576.80   | 0.002930 | P | 424.90   | 2.83 | 0.000167 | Scd2        | IMAGE:1348266, mRNA, complete cds                                                                                                     |
| 1416066_at   | 1741.80 | 0.001221 | P | 3673.30  | 0.000244 | P | 1931.50  | 2.83 | 0.000020 | Cd9         | stearyl-Coenzyme A desaturase 2                                                                                                       |
| 1416168_at   | 705.90  | 0.000244 | P | 1782.70  | 0.000244 | P | 1076.80  | 2.83 | 0.000035 | Serpinf1    | serine (or cysteine) proteinase inhibitor, clade F, member 1                                                                          |
| 1416524_at   | 372.60  | 0.001221 | P | 1457.20  | 0.000244 | P | 1084.60  | 2.83 | 0.000189 | Spop        | speckle-type POZ protein                                                                                                              |
| 1417104_at   | 355.20  | 0.095215 | A | 1294.20  | 0.001953 | P | 939.00   | 2.83 | 0.000030 | Emp3        | epithelial membrane protein 3                                                                                                         |
| 1417282_at   | 181.60  | 0.219482 | A | 506.40   | 0.000244 | P | 324.80   | 2.83 | 0.000068 | Mmp23       | matrix metalloproteinase 23                                                                                                           |
| 1417673_at   | 142.50  | 0.212891 | A | 341.40   | 0.008057 | P | 198.90   | 2.83 | 0.003041 | Grb14       | growth factor receptor bound protein 14                                                                                               |
| 1417715_a_at | 395.80  | 0.171387 | A | 1313.80  | 0.030273 | P | 918.00   | 2.83 | 0.002032 | Got2        | glutamyl oxaloacetate transaminase 2, mitochondrial                                                                                   |
| 1418237_s_at | 991.70  | 0.000244 | P | 2176.10  | 0.000244 | P | 1184.40  | 2.83 | 0.000020 | Col18a1     | procollagen, type XVIII, alpha 1                                                                                                      |
| 1419165_at   | 101.80  | 0.19458  | A | 299.50   | 0.030273 | P | 197.70   | 2.83 | 0.001651 | Zfp260      | zinc finger protein 260                                                                                                               |
| 1419292_at   | 598.80  | 0.000244 | P | 1289.50  | 0.000244 | P | 690.70   | 2.83 | 0.000130 | Htra3       | RIKEN cDNA 9530081K03 gene                                                                                                            |
| 1419839_x_at | 302.40  | 0.095215 | A | 736.10   | 0.000732 | P | 433.70   | 2.83 | 0.002032 | Prpf19      | DNA segment, Chr 19, Wayne State University 55, expressed                                                                             |
| 1421006_at   | 209.80  | 0.129639 | A | 951.70   | 0.014160 | P | 741.90   | 2.83 | 0.001336 | Col4a6      | procollagen, type IV, alpha 6                                                                                                         |
| 1421007_at   | 149.70  | 0.246094 | A | 570.60   | 0.005859 | P | 420.90   | 2.83 | 0.000040 | Col4a6      | procollagen, type IV, alpha 6                                                                                                         |
| 1421955_a_at | 619.90  | 0.000244 | P | 2309.30  | 0.000244 | P | 1689.40  | 2.83 | 0.000030 | Nedd4       | neural precursor cell expressed, developmentally down-regulated gene 4                                                                |
| 1423743_at   | 166.50  | 0.246094 | A | 492.50   | 0.001221 | P | 326.00   | 2.83 | 0.000273 | Arcn1       | archain 1                                                                                                                             |
| 1423781_at   | 145.10  | 0.219482 | A | 423.00   | 0.000244 | P | 277.90   | 2.83 | 0.000167 | Appbp1      | amyloid beta precursor protein binding protein 1                                                                                      |
| 1424895_at   | 149.90  | 0.334473 | A | 443.20   | 0.000732 | P | 293.30   | 2.83 | 0.003355 | Gpsm2       | RIKEN cDNA 6230410J09 gene                                                                                                            |
| 1425039_at   | 397.30  | 0.001221 | P | 881.80   | 0.000732 | P | 484.50   | 2.83 | 0.002250 | Itgb1       | RIKEN cDNA B930011D01 gene                                                                                                            |
| 1425239_a_at | 313.30  | 0.008057 | P | 644.70   | 0.000244 | P | 331.40   | 2.83 | 0.000774 | Cyb5r3      | diaphorase 1 (NADH)                                                                                                                   |
| 1427049_s_at | 116.60  | 0.27417  | A | 448.70   | 0.008057 | P | 332.10   | 2.83 | 0.000438 | Smo         | smoothed homolog (Drosophila)                                                                                                         |
| 1429888_a_at | 291.40  | 0.129639 | A | 949.20   | 0.002930 | P | 657.80   | 2.83 | 0.000035 | Hspb2       | heat shock protein 2                                                                                                                  |
| 1430533_a_at | 978.00  | 0.000244 | P | 2151.30  | 0.000244 | P | 1173.30  | 2.83 | 0.000035 | Ctnnb1      | catenin beta                                                                                                                          |
| 1432488_a_at | 116.30  | 0.366211 | A | 272.90   | 0.000244 | P | 156.60   | 2.83 | 0.000618 | LOC626830   | RIKEN cDNA 4930512K19 gene                                                                                                            |
| 1435315_s_at | 78.40   | 0.398926 | A | 214.60   | 0.004150 | P | 136.20   | 2.83 | 0.001486 | Rik         | RIKEN cDNA 2900034E22 gene                                                                                                            |
| 1436899_at   | 62.50   | 0.334473 | A | 168.90   | 0.000244 | P | 106.40   | 2.83 | 0.000865 | Rik         | RIKEN cDNA 2700019D07 gene                                                                                                            |
| 1448251_at   | 70.80   | 0.5      | A | 273.80   | 0.004150 | P | 203.00   | 2.83 | 0.002490 | Rik         | RIKEN cDNA 9030425E11 gene                                                                                                            |
| 1448468_a_at | 240.70  | 0.27417  | A | 1082.90  | 0.005371 | P | 842.20   | 2.83 | 0.000046 | Kcnab1      | potassium voltage-gated channel, shaker-related subfamily, beta member 1                                                              |
| 1449297_at   | 45.10   | 0.633789 | A | 181.90   | 0.004150 | P | 136.80   | 2.83 | 0.000167 | Casp12      | caspase 12                                                                                                                            |
| 1452107_s_at | 436.10  | 0.023926 | P | 976.50   | 0.014160 | P | 540.40   | 2.83 | 0.001336 | Npnt        | RIKEN cDNA B930011D01 gene                                                                                                            |
| 1452250_a_at | 1506.20 | 0.000732 | P | 4263.70  | 0.000244 | P | 2757.50  | 2.83 | 0.000052 | Col6a2      | procollagen, type VI, alpha 2                                                                                                         |
| 1452330_a_at | 1046.00 | 0.005859 | P | 2665.30  | 0.000244 | P | 1619.30  | 2.83 | 0.000030 | Mxra8       | RIKEN cDNA 1200013A08 gene                                                                                                            |
| 1416157_at   | 211.80  | 0.023926 | P | 577.40   | 0.002930 | P | 365.60   | 2.64 | 0.000492 | Vcl         | vinculin                                                                                                                              |
| 1416164_at   | 1622.10 | 0.000244 | P | 3838.70  | 0.000244 | P | 2216.60  | 2.64 | 0.000023 | Fbln5       | fibulin 5                                                                                                                             |
| 1416167_at   | 366.20  | 0.000244 | P | 1030.40  | 0.000244 | P | 664.20   | 2.64 | 0.000023 | Prdx4       | peroxiredoxin 4                                                                                                                       |
| 1416498_at   | 363.40  | 0.080566 | A | 1079.50  | 0.000244 | P | 716.10   | 2.64 | 0.000088 | Ppic        | peptidylprolyl isomerase C                                                                                                            |
| 1417312_at   | 302.50  | 0.19458  | A | 888.10   | 0.000732 | P | 585.60   | 2.64 | 0.000052 | Dkk3        | dickkopf homolog 3 (Xenopus laevis)                                                                                                   |
| 1417326_a_at | 117.60  | 0.533936 | A | 290.80   | 0.014160 | P | 173.20   | 2.64 | 0.004481 | Anapc11     | anaphase promoting complex subunit 11 homolog (yeast)                                                                                 |
| 1417481_at   | 423.70  | 0.00415  | P | 1174.20  | 0.000244 | P | 750.50   | 2.64 | 0.000020 | Ramp1       | receptor (calcitonin) activity modifying protein 1                                                                                    |
| 1418072_at   | 368.40  | 0.001953 | P | 821.70   | 0.000244 | P | 453.30   | 2.64 | 0.000020 | Hist1h2bc   | histone 1, H2bc                                                                                                                       |
| 1418450_at   | 846.90  | 0.000244 | P | 2102.40  | 0.000244 | P | 1255.50  | 2.64 | 0.000030 | Isr         | immunoglobulin superfamily containing leucine-rich repeat                                                                             |
| 1419099_x_at | 317.30  | 0.010742 | P | 941.10   | 0.000732 | P | 623.80   | 2.64 | 0.000023 | Stom        | erythrocyte protein band 7.2                                                                                                          |
| 1419638_at   | 219.60  | 0.19458  | A | 486.80   | 0.046143 | P | 267.20   | 2.64 | 0.004073 | Efnb2       | ephrin B2                                                                                                                             |
| 1420959_at   | 148.90  | 0.046143 | P | 567.10   | 0.002930 | P | 418.20   | 2.64 | 0.000692 | Asph        | aspartate-beta-hydroxylase                                                                                                            |
| 1421037_at   | 128.80  | 0.171387 | A | 268.50   | 0.000732 | P | 139.70   | 2.64 | 0.003041 | Npas2       | neuronal PAS domain protein 2                                                                                                         |
| 1421403_at   | 270.70  | 0.11572  | A | 531.90   | 0.014160 | P | 261.20   | 2.64 | 0.000774 | Pi15        | protease inhibitor 15                                                                                                                 |
| 1421855_at   | 190.60  | 0.246094 | A | 390.70   | 0.018555 | P | 200.10   | 2.64 | 0.001832 | Fgl2        | fibrinogen-like protein 2                                                                                                             |
| 1422603_at   | 585.30  | 0.023926 | P | 1237.70  | 0.000244 | P | 652.40   | 2.64 | 0.000167 | Rnase4      | ribonuclease, RNase A family 4                                                                                                        |
| 1423484_at   | 258.60  | 0.095215 | A | 503.80   | 0.000244 | P | 245.20   | 2.64 | 0.000147 | Bicc1       | bicaudal C homolog 1 (Drosophila)                                                                                                     |
| 1423584_at   | 6636.00 | 0.000244 | P | 19454.50 | 0.000244 | P | 12818.50 | 2.64 | 0.000020 | Igfbp7      | insulin-like growth factor binding protein 7                                                                                          |
| 1423606_at   | 2870.40 | 0.000244 | P | 7691.80  | 0.000244 | P | 4821.40  | 2.64 | 0.000114 | Postn       | osteoblast specific factor 2 (fascilin I-like)                                                                                        |
| 1424542_at   | 460.90  | 0.008057 | P | 1484.90  | 0.000732 | P | 1024.00  | 2.64 | 0.000046 | S100a4      | S100 calcium binding protein A4                                                                                                       |
| 1424683_at   | 154.80  | 0.080566 | A | 388.50   | 0.000732 | P | 233.70   | 2.64 | 0.000492 | Rik         | RIKEN cDNA 1810015C04 gene                                                                                                            |
| 1424768_at   | 491.50  | 0.001953 | P | 1260.00  | 0.000244 | P | 768.50   | 2.64 | 0.000078 | Cald1       | Mus musculus 0 day neonate head cDNA, RIKEN full-length enriched library, clone:4833423D12 product:unknown EST, full insert sequence. |
| 1425194_a_at | 398.70  | 0.018555 | P | 899.00   | 0.001221 | P | 500.30   | 2.64 | 0.000241 | Rik         | RIKEN cDNA                                                                                                                            |

|              |         |          |   |          |          |   |          |      |          |                                                                                                                       |                                                                                        |
|--------------|---------|----------|---|----------|----------|---|----------|------|----------|-----------------------------------------------------------------------------------------------------------------------|----------------------------------------------------------------------------------------|
| 1427066_a_at | 220.50  | 0.095215 | A | 431.40   | 0.001953 | P | 210.90   | 2.64 | 0.002250 | 4933439F18<br>Rik                                                                                                     | RIKEN cDNA 4933439F18 gene                                                             |
| 1427318_s_at | 152.20  | 0.095215 | A | 484.30   | 0.000732 | P | 332.10   | 2.64 | 0.000147 | Dysf /// Fer103                                                                                                       | RIKEN cDNA 2310051D19 gene                                                             |
| 1428267_at   | 193.50  | 0.046143 | P | 702.70   | 0.000244 | P | 509.20   | 2.64 | 0.000052 | Dhx40                                                                                                                 | RIKEN cDNA 2410016C14 gene                                                             |
| 1428842_a_at | 424.40  | 0.398926 | A | 1323.50  | 0.010742 | P | 899.10   | 2.64 | 0.000060 | Ngfrap1                                                                                                               | nerve growth factor receptor (TNFRSF16)                                                |
| 1433711_s_at | 313.60  | 0.111572 | A | 576.50   | 0.000244 | P | 262.90   | 2.64 | 0.000167 | Sesn1                                                                                                                 | associated protein 1                                                                   |
| 1434692_at   | 126.40  | 0.432373 | A | 344.50   | 0.004150 | P | 218.10   | 2.64 | 0.003699 | 1110034B05<br>Rik                                                                                                     | RIKEN cDNA 1110034B05 gene                                                             |
| 1434927_at   | 288.00  | 0.037598 | P | 688.10   | 0.000244 | P | 400.10   | 2.64 | 0.000214 | Hspb7                                                                                                                 | heat shock protein family, member 7 (cardiovascular)                                   |
| 1435176_a_at | 183.30  | 0.129639 | A | 462.50   | 0.002930 | P | 279.20   | 2.64 | 0.000147 | Id2                                                                                                                   | inhibitor of DNA binding 2                                                             |
| 1435250_at   | 87.60   | 0.239502 | A | 258.80   | 0.002930 | P | 171.20   | 2.64 | 0.001486 | Ints8                                                                                                                 | cyclin E2                                                                              |
| 1435321_at   | 1014.60 | 0.000732 | P | 2882.00  | 0.000244 | P | 1867.40  | 2.64 | 0.000020 | Rik                                                                                                                   | RIKEN cDNA 3732412D22 gene                                                             |
| 1448145_at   | 168.70  | 0.486064 | A | 566.60   | 0.000244 | P | 397.90   | 2.64 | 0.000027 | Wwp2                                                                                                                  | WW domain-containing protein 4                                                         |
| 1448323_a_at | 4635.40 | 0.000244 | P | 14429.60 | 0.000244 | P | 9794.20  | 2.64 | 0.000020 | Bgn                                                                                                                   | biglycan                                                                               |
| 1448368_at   | 420.30  | 0.008057 | P | 965.70   | 0.000244 | P | 545.40   | 2.64 | 0.000020 | Dctn6                                                                                                                 | dynactin 6                                                                             |
| 1449300_at   | 160.80  | 0.111572 | A | 552.10   | 0.000244 | P | 391.30   | 2.64 | 0.000389 | Ctnnbp2nl                                                                                                             | cDNA sequence BC003236                                                                 |
| 1450990_at   | 224.00  | 0.111572 | A | 851.50   | 0.000244 | P | 627.50   | 2.64 | 0.000020 | Gpc3                                                                                                                  | glypican 3                                                                             |
| 1451230_a_at | 391.40  | 0.008057 | P | 1461.70  | 0.000244 | P | 1070.30  | 2.64 | 0.000020 | Wbp5                                                                                                                  | WW domain binding protein 5                                                            |
| 1451935_a_at | 275.10  | 0.004150 | P | 580.90   | 0.000732 | P | 305.80   | 2.64 | 0.000167 | Spint2                                                                                                                | serine protease inhibitor, Kunitz type 2                                               |
| 1452036_a_at | 158.00  | 0.171387 | A | 300.70   | 0.000732 | P | 142.70   | 2.64 | 0.000865 | Tmpo                                                                                                                  | thymopoietin                                                                           |
| 1454860_x_at | 176.00  | 0.274117 | A | 445.00   | 0.030273 | P | 269.00   | 2.64 | 0.000618 | Dad1                                                                                                                  | defender against cell death 1                                                          |
| 1456084_x_at | 113.80  | 0.366211 | A | 391.50   | 0.001221 | P | 277.70   | 2.64 | 0.000492 | Fmod                                                                                                                  | fibromodulin                                                                           |
| 1456195_x_at | 263.50  | 0.018555 | P | 980.40   | 0.000244 | P | 716.90   | 2.64 | 0.000020 | Itgb5                                                                                                                 | integrin beta 5                                                                        |
| 1456733_x_at | 1040.00 | 0.000732 | P | 2765.00  | 0.000244 | P | 1725.00  | 2.64 | 0.000035 | Serpinh1                                                                                                              | serine (or cysteine) proteinase inhibitor, clade H, member 1                           |
| 1415949_at   | 1102.70 | 0.002930 | P | 6791.90  | 0.000244 | P | 5689.20  | 2.46 | 0.000060 | Cpe                                                                                                                   | carboxypeptidase E                                                                     |
| 1415965_at   | 503.90  | 0.000244 | P | 1556.30  | 0.000732 | P | 1052.40  | 2.46 | 0.000101 | Scd1                                                                                                                  | stearoyl-Coenzyme A desaturase 1                                                       |
| 1416343_a_at | 97.80   | 0.171387 | A | 288.00   | 0.004150 | P | 190.20   | 2.46 | 0.000618 | Lamp2                                                                                                                 | lysosomal membrane glycoprotein 2                                                      |
| 1416416_x_at | 1919.10 | 0.000244 | P | 3758.60  | 0.000244 | P | 1839.50  | 2.46 | 0.000020 | Gstm1                                                                                                                 | glutathione S-transferase, mu 1                                                        |
| 1416457_at   | 134.10  | 0.398926 | A | 431.80   | 0.001221 | P | 297.70   | 2.46 | 0.002490 | Ddah2                                                                                                                 | dimethylarginine dimethylaminohydrolase 2                                              |
| 1416493_at   | 524.80  | 0.001221 | P | 1163.80  | 0.002930 | P | 639.00   | 2.46 | 0.002032 | Ddost                                                                                                                 | dolichyl-di-phosphooligosaccharide-protein glycotransferase                            |
| 1418171_at   | 233.80  | 0.111572 | A | 489.80   | 0.000732 | P | 256.00   | 2.46 | 0.000052 | Tceal8                                                                                                                | RIKEN cDNA 3930402F23 gene                                                             |
| 1418186_at   | 358.90  | 0.002930 | P | 879.60   | 0.000244 | P | 520.70   | 2.46 | 0.000114 | Gstt1                                                                                                                 | glutathione S-transferase, theta 1                                                     |
| 1418365_at   | 713.40  | 0.004150 | P | 1868.70  | 0.000732 | P | 1155.30  | 2.46 | 0.000023 | Ctsh                                                                                                                  | cathepsin H                                                                            |
| 1418511_at   | 1458.20 | 0.001221 | P | 3704.90  | 0.000244 | P | 2246.70  | 2.46 | 0.000020 | Dpt                                                                                                                   | dermatopontin                                                                          |
| 1419254_at   | 140.70  | 0.056152 | M | 410.50   | 0.000244 | P | 269.80   | 2.46 | 0.003699 | Mthfd2                                                                                                                | methylene tetrahydrofolate dehydrogenase (NAD+ dependent), methyltetrahydrofolate      |
| 1420862_at   | 131.80  | 0.274117 | A | 337.60   | 0.002930 | P | 205.80   | 2.46 | 0.000692 | Dctn4                                                                                                                 | cyclohydrolase                                                                         |
| 1421854_at   | 269.60  | 0.046143 | P | 667.70   | 0.001221 | P | 398.10   | 2.46 | 0.000346 | Fgl2                                                                                                                  | dynactin 4                                                                             |
| 1422414_a_at | 413.10  | 0.002930 | P | 1138.90  | 0.000732 | P | 725.80   | 2.46 | 0.000078 | Calm2                                                                                                                 | calmodulin 2                                                                           |
| 1423259_at   | 202.60  | 0.037598 | P | 532.80   | 0.001221 | P | 330.20   | 2.46 | 0.000273 | Id4                                                                                                                   | inhibitor of DNA binding 4                                                             |
| 1423321_at   | 520.80  | 0.095215 | A | 935.50   | 0.008057 | P | 414.70   | 2.46 | 0.000027 | Myadm                                                                                                                 | myeloid-associated differentiation marker                                              |
| 1423694_at   | 458.60  | 0.000244 | P | 1898.10  | 0.000732 | P | 1439.50  | 2.46 | 0.000492 | Kctd10                                                                                                                | myosin IH                                                                              |
| 1424186_at   | 995.50  | 0.000732 | P | 2966.90  | 0.000244 | P | 1971.40  | 2.46 | 0.000020 | Ccdc80                                                                                                                | steroid sensitive gene 1                                                               |
| 1424424_at   | 693.60  | 0.023926 | P | 841.90   | 0.004150 | P | 148.30   | 2.46 | 0.000214 | Slc39a1                                                                                                               | M.musculus partial cochlear mRNA (clone 301A6)                                         |
| 1424802_a_at | 114.30  | 0.303711 | A | 297.10   | 0.018555 | P | 182.80   | 2.46 | 0.002032 | Rik                                                                                                                   | RIKEN cDNA 3300001P08 gene                                                             |
| 1425504_at   | 135.50  | 0.334473 | A | 423.40   | 0.030273 | P | 287.90   | 2.46 | 0.000068 | Myk                                                                                                                   | myosin, light polypeptide kinase                                                       |
| 1426258_at   | 247.40  | 0.044434 | P | 606.00   | 0.000732 | P | 358.60   | 2.46 | 0.000167 | Sor1                                                                                                                  | sortilin-related receptor, LDLR class A repeats-containing                             |
| 1427485_at   | 590.30  | 0.046143 | P | 1294.60  | 0.001221 | P | 704.30   | 2.46 | 0.000046 | Lmod1                                                                                                                 | leiomodulin 1 (smooth muscle)                                                          |
| 1427510_at   | 81.50   | 0.303711 | A | 281.20   | 0.014160 | P | 199.70   | 2.46 | 0.001486 | Gnai1                                                                                                                 | guanine nucleotide binding protein, alpha inhibiting 1                                 |
| 1427932_s_at | 8218.20 | 0.000244 | P | 18137.10 | 0.000244 | P | 9918.90  | 2.46 | 0.000020 | 1200003110R<br>ik ///<br>1200015M12<br>Rik ///<br>1200016E24<br>Rik ///<br>A130040M12<br>Rik ///<br>E430024C06<br>Rik |                                                                                        |
| 1428065_at   | 122.80  | 0.334473 | A | 366.60   | 0.046143 | P | 243.80   | 2.46 | 0.003355 | Slc44a2                                                                                                               | RIKEN cDNA 1110028E10 gene                                                             |
| 1431105_a_at | 53.10   | 0.601074 | A | 158.80   | 0.010742 | P | 105.70   | 2.46 | 0.001336 | Tmem33                                                                                                                | RIKEN cDNA 1600019D15 gene                                                             |
| 1434745_at   | 337.30  | 0.046143 | P | 1116.20  | 0.000244 | P | 778.90   | 2.46 | 0.000023 | Ccnd2                                                                                                                 | RIKEN cDNA 2600016F06 gene                                                             |
| 1436372_a_at | 109.90  | 0.274117 | A | 416.40   | 0.002930 | P | 306.50   | 2.46 | 0.000130 | Pdxcd1                                                                                                                | expressed sequence AA415817                                                            |
| 1436665_a_at | 647.00  | 0.000244 | P | 1737.20  | 0.000244 | P | 1090.20  | 2.46 | 0.000020 | Ltbp4                                                                                                                 | RIKEN cDNA 2310046A13 gene                                                             |
| 1437401_at   | 226.80  | 0.095215 | A | 604.50   | 0.001953 | P | 377.70   | 2.46 | 0.001832 | ---                                                                                                                   | RIKEN cDNA C730016P09 gene                                                             |
| 1437513_a_at | 505.70  | 0.010742 | P | 945.50   | 0.000244 | P | 439.80   | 2.46 | 0.000346 | Serinc1                                                                                                               | tumor differentially expressed 1, like                                                 |
| 1448123_s_at | 588.30  | 0.000244 | P | 1654.50  | 0.000244 | P | 1066.20  | 2.46 | 0.000346 | Tgfb1                                                                                                                 | transforming growth factor, beta induced, 68 kDa                                       |
| 1448183_a_at | 101.10  | 0.366211 | A | 268.90   | 0.001953 | P | 167.80   | 2.46 | 0.001336 | Hif1a                                                                                                                 | hypoxia inducible factor 1, alpha subunit                                              |
| 1449249_at   | 164.20  | 0.018555 | P | 417.90   | 0.000732 | P | 253.70   | 2.46 | 0.001201 | Pcdh7                                                                                                                 | protocadherin 7                                                                        |
| 1449635_at   | 315.50  | 0.095215 | A | 726.10   | 0.000244 | P | 410.60   | 2.46 | 0.001201 | Prpf19                                                                                                                | DNA segment, Chr 19, Wayne State University 55, expressed                              |
| 1451978_at   | 783.60  | 0.014160 | P | 1992.60  | 0.000244 | P | 1209.00  | 2.46 | 0.000020 | Loxl1                                                                                                                 | lysyl oxidase-like                                                                     |
| 1455956_x_at | 270.40  | 0.080566 | A | 519.70   | 0.000244 | P | 249.30   | 2.46 | 0.000552 | Ccnd2                                                                                                                 | cyclin D2                                                                              |
| 1456133_x_at | 654.60  | 0.001953 | P | 1606.00  | 0.000244 | P | 951.40   | 2.46 | 0.000027 | Itgb5                                                                                                                 | integrin beta 5                                                                        |
| 1460180_at   | 319.10  | 0.004150 | P | 733.20   | 0.001221 | P | 414.10   | 2.46 | 0.000167 | Hexb                                                                                                                  | hexosaminidase B                                                                       |
| 1415919_at   | 85.50   | 0.219482 | A | 457.40   | 0.004150 | P | 371.90   | 2.30 | 0.000865 | Npdc1                                                                                                                 | neural proliferation, differentiation and control gene 1                               |
| 1416092_a_at | 141.90  | 0.366211 | A | 298.50   | 0.010742 | P | 156.60   | 2.30 | 0.000774 | Mtap4                                                                                                                 | microtubule-associated protein 4                                                       |
| 1416405_at   | 4532.90 | 0.000244 | P | 14758.10 | 0.000244 | P | 10225.20 | 2.30 | 0.000020 | Bgn                                                                                                                   | biglycan                                                                               |
| 1416441_at   | 162.00  | 0.246094 | A | 645.20   | 0.000732 | P | 483.20   | 2.30 | 0.000020 | Pgcp                                                                                                                  | plasma glutamate carboxypeptidase                                                      |
| 1416554_at   | 706.00  | 0.000244 | P | 1510.00  | 0.000244 | P | 804.00   | 2.30 | 0.000020 | Pdlim1                                                                                                                | PDZ and LIM domain 1 (elfin)                                                           |
| 1416740_at   | 1031.40 | 0.000732 | P | 2660.80  | 0.000244 | P | 1629.40  | 2.30 | 0.000046 | Col5a1                                                                                                                | procollagen, type V, alpha 1                                                           |
| 1416815_s_at | 262.70  | 0.014160 | P | 748.00   | 0.001953 | P | 485.30   | 2.30 | 0.003041 | Bub3                                                                                                                  | budding uninhibited by benzimidazoles 3 homolog (S. cerevisiae)                        |
| 1417015_at   | 74.30   | 0.780518 | A | 187.10   | 0.008057 | P | 112.80   | 2.30 | 0.000692 | Rassf3                                                                                                                | Ras association (RalGDS/AF-6) domain family 3                                          |
| 1417634_at   | 404.80  | 0.171387 | A | 786.70   | 0.023926 | P | 381.90   | 2.30 | 0.000035 | Sod3                                                                                                                  | superoxide dismutase 3, extracellular                                                  |
| 1418570_at   | 145.20  | 0.194584 | A | 381.50   | 0.000244 | P | 236.30   | 2.30 | 0.000552 | Ncstrn                                                                                                                | nicastrin                                                                              |
| 1418745_at   | 218.80  | 0.046143 | P | 461.80   | 0.023926 | P | 243.00   | 2.30 | 0.001832 | Omd                                                                                                                   | osteomodulin                                                                           |
| 1418912_at   | 369.40  | 0.008057 | P | 991.40   | 0.000244 | P | 622.00   | 2.30 | 0.000147 | Plxcd2                                                                                                                | RIKEN cDNA 1200007L24 gene                                                             |
| 1419114_at   | 140.90  | 0.111572 | A | 550.40   | 0.001953 | P | 409.50   | 2.30 | 0.000130 | Alg14                                                                                                                 | RIKEN cDNA 5430428G01 gene                                                             |
| 1420479_a_at | 161.50  | 0.219482 | A | 335.20   | 0.004150 | P | 173.70   | 2.30 | 0.001336 | Nap111                                                                                                                | nucleosome assembly protein 1-like 1                                                   |
| 1420693_at   | 336.60  | 0.030273 | P | 744.30   | 0.002930 | P | 407.70   | 2.30 | 0.003699 | Myom1                                                                                                                 | myomesin 1                                                                             |
| 1420696_at   | 381.00  | 0.000732 | P | 690.30   | 0.000244 | P | 309.30   | 2.30 | 0.000167 | Sema3c                                                                                                                | sema domain, immunoglobulin domain (Ig), short basic domain, secreted, (semaphorin) 3C |
| 1420895_at   | 168.40  | 0.129639 | A | 444.10   | 0.001953 | P | 275.70   | 2.30 | 0.001077 | Tgfb1                                                                                                                 | transforming growth factor, beta receptor I                                            |

|                     |               |                   |  |                |                   |  |                |             |                 |                          |                                                                                                   |
|---------------------|---------------|-------------------|--|----------------|-------------------|--|----------------|-------------|-----------------|--------------------------|---------------------------------------------------------------------------------------------------|
| 1421400_at          | 206.10        | 0.095215 A        |  | 413.20         | 0.002930 P        |  | 207.10         | 2.30        | 0.000214        | Kcnmb1                   | potassium large conductance calcium-activated channel, subfamily M, beta member 1                 |
| 1421832_at          | 157.10        | 0.466064 A        |  | 583.40         | 0.002930 P        |  | 426.30         | 2.30        | 0.000189        | Twsg1                    | twisted gastrulation protein                                                                      |
| 1422340_a_at        | 751.30        | 0.01416 P         |  | 1200.70        | 0.002930 P        |  | 449.40         | 2.30        | 0.000130        | Actg2                    | actin, gamma 2, smooth muscle, enteric                                                            |
| 1422905_s_at        | 1389.80       | 0.000732 P        |  | 2458.10        | 0.000244 P        |  | 1068.30        | 2.30        | 0.000966        | Fmo2                     | flavin containing monooxygenase 2                                                                 |
| 1423025_a_at        | 201.40        | 0.111572 A        |  | 412.50         | 0.001221 P        |  | 211.10         | 2.30        | 0.000774        | Schp1                    | schwannomin interacting protein 1                                                                 |
| 1423263_at          | 1180.50       | 0.000244 P        |  | 2522.00        | 0.000244 P        |  | 1341.50        | 2.30        | 0.000020        | H3f3a                    | H3 histone, family 3A                                                                             |
| 1423345_at          | 539.50        | 0.000732 P        |  | 1197.40        | 0.000244 P        |  | 657.90         | 2.30        | 0.000167        | Degs1                    | degenerative spermatocyte homolog (Drosophila)                                                    |
| 1423472_at          | 1010.30       | 0.001953 P        |  | 3156.80        | 0.000732 P        |  | 2146.50        | 2.30        | 0.000030        | Sept2                    | septin 2                                                                                          |
| 1423585_at          | 206.90        | 0.095215 A        |  | 380.30         | 0.008057 P        |  | 173.40         | 2.30        | 0.003699        | Igfbp7 ///<br>LOC621527  | hypothetical protein MGC47046                                                                     |
| 1423607_at          | 397.60        | 0.001221 P        |  | 1259.70        | 0.000244 P        |  | 862.10         | 2.30        | 0.000214        | Lum                      | lumican                                                                                           |
| 1423824_at          | 184.30        | 0.091553 A        |  | 363.50         | 0.000244 P        |  | 179.20         | 2.30        | 0.001832        | Gpr177                   | RIKEN cDNA 5031439A09 gene                                                                        |
| 1423915_at          | 555.80        | 0.023926 P        |  | 1824.50        | 0.000244 P        |  | 1268.70        | 2.30        | 0.000020        | Olfml2b                  | RIKEN cDNA 4832415H08 gene                                                                        |
| 1425464_at          | 250.40        | 0.095215 A        |  | 629.90         | 0.000732 P        |  | 379.50         | 2.30        | 0.000241        | Gata6                    | GATA binding protein 6                                                                            |
| 1425529_s_at        | 196.50        | 0.023926 P        |  | 543.40         | 0.000732 P        |  | 346.90         | 2.30        | 0.004073        | D19Wsu162e               | DNA segment, Chr 19, Wayne State University 162, expressed                                        |
| 1426457_at          | 1877.70       | 0.000244 P        |  | 3866.50        | 0.000244 P        |  | 1988.80        | 2.30        | 0.000023        | Slimap                   | sarcolemma associated protein                                                                     |
| 1426710_at          | 873.10        | 0.001953 P        |  | 2569.70        | 0.000244 P        |  | 1696.60        | 2.30        | 0.000027        | Calm3                    | calmodulin 3                                                                                      |
| 1426743_at          | 171.80        | 0.046143 P        |  | 460.20         | 0.001221 P        |  | 288.40         | 2.30        | 0.003041        | Appl2                    | DIP13 beta                                                                                        |
| 1426992_at          | 299.80        | 0.01416 P         |  | 892.90         | 0.001953 P        |  | 593.10         | 2.30        | 0.004481        | Xpr1                     | xenotropic and polytropic retrovirus receptor 1                                                   |
| 1427831_s_at        | 76.60         | 0.303711 A        |  | 300.00         | 0.001953 P        |  | 223.40         | 2.30        | 0.000774        | /// Zfp260               | zinc finger protein 63                                                                            |
| 1432436_a_at        | 253.80        | 0.219482 A        |  | 857.20         | 0.030273 P        |  | 603.40         | 2.30        | 0.002032        | Ak3                      | adenylate kinase 3 alpha-like                                                                     |
| 1433953_at          | 290.10        | 0.046143 P        |  | 511.50         | 0.002930 P        |  | 221.40         | 2.30        | 0.000020        | Zfp277                   | RIKEN cDNA 2410017E24 gene                                                                        |
| 1448590_at          | 1080.30       | 0.000244 P        |  | 3313.30        | 0.000244 P        |  | 2233.00        | 2.30        | 0.000027        | Col6a1                   | procollagen, type VI, alpha 1                                                                     |
| 1448816_at          | 2580.30       | 0.005859 P        |  | 5193.90        | 0.001953 P        |  | 2613.60        | 2.30        | 0.000130        | Ptgis                    | prostaglandin I2 (prostaglycine) synthase                                                         |
| 1448883_at          | 69.00         | 0.398926 A        |  | 235.60         | 0.005859 P        |  | 166.60         | 2.30        | 0.001336        | Lgmn                     | legumain                                                                                          |
| 1449341_a_at        | 615.60        | 0.000732 P        |  | 1860.80        | 0.000732 P        |  | 1245.20        | 2.30        | 0.000027        | Stom                     | erythrocyte protein band 7.2                                                                      |
| 1449410_a_at        | 632.30        | 0.00415 P         |  | 1706.60        | 0.000244 P        |  | 1074.30        | 2.30        | 0.000020        | Gas5                     | growth arrest specific 5                                                                          |
| 1450008_a_at        | 564.60        | 0.001953 P        |  | 1304.20        | 0.000244 P        |  | 739.60         | 2.30        | 0.000552        | Cttnb1                   | catenin beta                                                                                      |
| 1450648_s_at        | 138.00        | 0.432373 A        |  | 310.10         | 0.030273 P        |  | 172.10         | 2.30        | 0.000088        | H2-Ab1                   | histocompatibility 2, class II antigen A, beta 1                                                  |
| 1450898_at          | 76.50         | 0.72583 A         |  | 183.00         | 0.080057 P        |  | 106.50         | 2.30        | 0.002490        | Hiat1                    | hippocampus abundant gene transcript 1                                                            |
| 1451446_at          | 302.90        | 0.030273 P        |  | 638.70         | 0.000244 P        |  | 335.80         | 2.30        | 0.000030        | Antxr1                   | RIKEN cDNA 2310008J16 gene                                                                        |
| 1452346_at          | 177.20        | 0.144043 A        |  | 338.70         | 0.018555 P        |  | 161.50         | 2.30        | 0.004481        | B3gnt1                   | RIKEN cDNA 1500032M01 gene                                                                        |
| 1452545_a_at        | 1225.40       | 0.00415 P         |  | 4379.80        | 0.001953 P        |  | 3154.40        | 2.30        | 0.000068        | Itgb1                    | integrin beta 1 (fibronectin receptor beta)                                                       |
| 1454373_x_at        | 752.40        | 0.000244 P        |  | 1151.30        | 0.000244 P        |  | 398.90         | 2.30        | 0.001486        | Ubc                      | ubiquitin C                                                                                       |
| 1456005_a_at        | 83.90         | 0.533936 A        |  | 269.00         | 0.023926 P        |  | 185.10         | 2.30        | 0.000865        | Bcl2l11                  | BCL2-like 11 (apoptosis facilitator)                                                              |
| 1460351_at          | 1430.00       | 0.000244 P        |  | 3086.40        | 0.000244 P        |  | 1656.40        | 2.30        | 0.000030        | S100a11                  | S100 calcium binding protein A11 (calizzarin)                                                     |
| 1415741_at          | 461.00        | 0.01416 P         |  | 958.10         | 0.000732 P        |  | 497.10         | 2.14        | 0.000040        | Tmem165                  | TPA regulated locus                                                                               |
| 1415961_at          | 548.50        | 0.00293 P         |  | 1328.80        | 0.000732 P        |  | 780.30         | 2.14        | 0.000030        | Itm2c                    | integral membrane protein 2C                                                                      |
| 1416225_at          | 939.50        | 0.00415 P         |  | 2144.60        | 0.000244 P        |  | 1205.10        | 2.14        | 0.000020        | Adh1                     | alcohol dehydrogenase 1 (class I)                                                                 |
| 1416321_s_at        | 1170.90       | 0.001221 P        |  | 2873.30        | 0.000244 P        |  | 1702.40        | 2.14        | 0.000030        | Prelp                    | proline arginine-rich end leucine-rich repeat                                                     |
| 1416612_at          | 826.50        | 0.00293 P         |  | 1421.90        | 0.000244 P        |  | 595.40         | 2.14        | 0.000030        | Cyp1b1                   | cytochrome P450, 1b1, benz[a]anthracene inducible                                                 |
| 1416660_at          | 311.70        | 0.219482 A        |  | 867.40         | 0.046143 P        |  | 555.70         | 2.14        | 0.000241        | Eif3s10                  | eukaryotic translation initiation factor 3                                                        |
| 1416721_s_at        | 229.40        | 0.095215 A        |  | 994.30         | 0.000244 P        |  | 764.90         | 2.14        | 0.000865        | Sfrs6                    | RIKEN cDNA 1210001E11 gene                                                                        |
| 1416768_at          | 622.30        | 0.000244 P        |  | 1457.60        | 0.000732 P        |  | 835.30         | 2.14        | 0.000346        | Rik                      | RIKEN cDNA 1110003E01 gene                                                                        |
| 1417124_at          | 4308.00       | 0.000732 P        |  | 10644.40       | 0.000244 P        |  | 6336.40        | 2.14        | 0.000020        | Dstn                     | desmin                                                                                            |
| 1417259_a_at        | 606.90        | 0.001221 P        |  | 1957.90        | 0.000244 P        |  | 1351.00        | 2.14        | 0.000020        | Capzb                    | capping protein (actin filament) muscle Z-line, beta                                              |
| 1417307_at          | 307.20        | 0.001221 P        |  | 494.30         | 0.000244 P        |  | 187.10         | 2.14        | 0.002032        | Dmd                      | dystrophin, muscular dystrophy                                                                    |
| 1417560_at          | 220.30        | 0.00293 P         |  | 766.90         | 0.001221 P        |  | 546.60         | 2.14        | 0.001832        | Sfxn1                    | sideroflexin 1                                                                                    |
| 1417614_at          | 122.20        | 0.432373 A        |  | 417.40         | 0.005859 P        |  | 295.20         | 2.14        | 0.000438        | Ckm                      | creatine kinase, muscle                                                                           |
| 1417633_at          | 1294.20       | 0.001221 P        |  | 3119.10        | 0.000244 P        |  | 1824.90        | 2.14        | 0.000060        | Sod3                     | superoxide dismutase 3, extracellular                                                             |
| 1417693_a_at        | 447.80        | 0.056152 M        |  | 610.00         | 0.030273 P        |  | 162.20         | 2.14        | 0.001832        | Gab1                     | growth factor receptor bound protein 2-associated protein 1                                       |
| 1417917_at          | 2577.30       | 0.000244 P        |  | 6373.00        | 0.000244 P        |  | 3795.70        | 2.14        | 0.000020        | Cnn1                     | calponin 1                                                                                        |
| 1418136_at          | 653.40        | 0.023926 P        |  | 1365.90        | 0.000244 P        |  | 712.50         | 2.14        | 0.000020        | Tgfb11                   | transforming growth factor beta 1 induced transcript 1                                            |
| 1418584_at          | 200.00        | 0.046143 P        |  | 580.70         | 0.001953 P        |  | 380.70         | 2.14        | 0.000167        | Ccnh ///<br>LOC672655    | cyclin H                                                                                          |
| 1419196_at          | 183.80        | 0.067627 A        |  | 325.60         | 0.014160 P        |  | 141.80         | 2.14        | 0.000692        | Hamp1                    | hepcidin antimicrobial peptide                                                                    |
| 1419302_at          | 345.10        | 0.030273 P        |  | 751.30         | 0.000244 P        |  | 406.20         | 2.14        | 0.000023        | Heyl                     | hairly/enhancer-of-split related with YRPW motif-like                                             |
| 1419376_at          | 333.30        | 0.037598 P        |  | 859.70         | 0.000244 P        |  | 526.40         | 2.14        | 0.000346        | Rik                      | RIKEN cDNA 1110018M03 gene                                                                        |
| 1419741_at          | 714.40        | 0.001953 P        |  | 935.70         | 0.001221 P        |  | 221.30         | 2.14        | 0.002753        | Supt16h                  | suppressor of Ty 16 homolog (S. cerevisiae)                                                       |
| 1420607_at          | 67.30         | 0.27417 A         |  | 178.40         | 0.010742 P        |  | 111.10         | 2.14        | 0.000307        | Rbm18                    | RIKEN cDNA 2010004P11 gene                                                                        |
| 1420688_a_at        | 571.70        | 0.010742 P        |  | 1412.90        | 0.000244 P        |  | 841.20         | 2.14        | 0.000020        | Sgce                     | sarcoglycan, epsilon                                                                              |
| 1420867_at          | 446.20        | 0.018555 P        |  | 809.80         | 0.001953 P        |  | 363.60         | 2.14        | 0.000552        | Tmed2                    | coated vesicle membrane protein                                                                   |
| <b>1421425_a_at</b> | <b>847.30</b> | <b>0.000244 P</b> |  | <b>1912.40</b> | <b>0.000732 P</b> |  | <b>1065.10</b> | <b>2.14</b> | <b>0.000088</b> | <b>Dscr111</b>           | <b>Down syndrome critical region gene 1-like 1</b>                                                |
| 1421895_at          | 337.50        | 0.001953 P        |  | 503.90         | 0.000732 P        |  | 166.40         | 2.14        | 0.000966        | Eif2s3x ///<br>LOC673373 | eukaryotic translation initiation factor 2, subunit 3, structural gene X-linked                   |
| 1422675_at          | 279.00        | 0.018555 P        |  | 518.30         | 0.001953 P        |  | 239.30         | 2.14        | 0.001201        | Smarce1                  | SWI/SNF related, matrix associated, actin dependent regulator of chromatin, subfamily e, member 1 |
| 1423657_at          | 235.40        | 0.27417 A         |  | 417.50         | 0.005859 P        |  | 182.10         | 2.14        | 0.001486        | Cdipt                    | DNA segment, Chr 7, Brigham & Women's Genetics 0575 expressed                                     |
| 1423782_at          | 173.50        | 0.018555 P        |  | 335.50         | 0.000244 P        |  | 162.00         | 2.14        | 0.002032        | Mobk1b                   | similar to CG4946 gene product                                                                    |
| 1423946_at          | 197.10        | 0.246094 A        |  | 449.00         | 0.000244 P        |  | 251.90         | 2.14        | 0.000307        | Pdlim2                   | hypothetical protein MGC37634                                                                     |
| 1424002_at          | 584.90        | 0.001953 P        |  | 1411.90        | 0.000244 P        |  | 827.00         | 2.14        | 0.000692        | Pdcl3                    | RIKEN cDNA 1110061A19 gene                                                                        |
| 1424438_a_at        | 289.50        | 0.095215 A        |  | 779.60         | 0.000244 P        |  | 490.10         | 2.14        | 0.000167        | Leprot                   | hypothetical protein MGC6694                                                                      |
| 1424596_s_at        | 848.70        | 0.001221 P        |  | 1673.50        | 0.000244 P        |  | 824.80         | 2.14        | 0.000046        | Lmcd1                    | LIM and cysteine-rich domains 1                                                                   |
| 1425528_at          | 297.70        | 0.00415 P         |  | 690.50         | 0.001221 P        |  | 392.80         | 2.14        | 0.000088        | Prrx1                    | paired related homeobox 1                                                                         |
| 1425627_x_at        | 164.90        | 0.27417 A         |  | 451.80         | 0.037598 P        |  | 286.90         | 2.14        | 0.000774        | Gstm1 ///<br>LOC433943   | glutathione S-transferase, mu 1                                                                   |
| 1425929_a_at        | 181.30        | 0.303711 A        |  | 372.10         | 0.010742 P        |  | 190.80         | 2.14        | 0.001832        | Rnf14                    | ring finger protein 14                                                                            |
| 1426642_at          | 1557.00       | 0.000244 P        |  | 3410.70        | 0.000244 P        |  | 1853.70        | 2.14        | 0.000020        | Fn1                      | fibronectin 1                                                                                     |
| 1426918_at          | 786.30        | 0.00293 P         |  | 2578.90        | 0.000244 P        |  | 1792.60        | 2.14        | 0.000020        | Itgb1                    | integrin beta 1 (fibronectin receptor beta)                                                       |
| 1433575_at          | 115.70        | 0.056152 M        |  | 312.40         | 0.001953 P        |  | 196.70         | 2.14        | 0.001201        | LOC672274                | SRY-box containing gene 4                                                                         |
| 1434832_at          | 245.60        | 0.018555 P        |  | 545.50         | 0.004150 P        |  | 299.90         | 2.14        | 0.000865        | Foxo3a                   | RIKEN cDNA 1110048B16 gene                                                                        |
| 1434944_at          | 363.80        | 0.023926 P        |  | 650.90         | 0.000244 P        |  | 287.10         | 2.14        | 0.000865        | Dmpk                     | dystrophia myotonica kinase, B15                                                                  |
| 1435362_at          | 285.20        | 0.000732 P        |  | 690.40         | 0.001221 P        |  | 405.20         | 2.14        | 0.000307        | Foxj3                    | RIKEN cDNA C330039G02 gene                                                                        |
| 1438092_x_at        | 195.90        | 0.19458 A         |  | 332.20         | 0.010742 P        |  | 136.30         | 2.14        | 0.001201        | LOC675899                | H2A histone family, member Z                                                                      |
| 1438251_x_at        | 1871.20       | 0.001221 P        |  | 3645.60        | 0.001953 P        |  | 1774.40        | 2.14        | 0.000114        | Htra1                    | protease, serine, 11 (lgf binding)                                                                |
| 1448213_at          | 970.00        | 0.001953 P        |  | 1955.70        | 0.000732 P        |  | 985.70         | 2.14        | 0.000130        | Anxa1                    | annexin A1                                                                                        |

|              |          |            |          |            |          |      |          |           |                                                                                                                                        |
|--------------|----------|------------|----------|------------|----------|------|----------|-----------|----------------------------------------------------------------------------------------------------------------------------------------|
| 1448330_at   | 1492.60  | 0.000244 P | 3082.00  | 0.000244 P | 1589.40  | 2.14 | 0.000020 | Gstm1     | glutathione S-transferase, mu 1                                                                                                        |
| 1448416_at   | 13509.90 | 0.000244 P | 31115.20 | 0.000244 P | 17605.30 | 2.14 | 0.000020 | Mgp       | matrix gamma-carboxyglutamate (gla) protein                                                                                            |
| 1448538_a_at | 305.40   | 0.008057 P | 816.70   | 0.001221 P | 511.30   | 2.14 | 0.000552 | D4Wsu53e  | DNA segment, Chr 4, Wayne State University 53, expressed                                                                               |
| 1448669_at   | 194.50   | 0.056152 M | 528.30   | 0.018555 P | 333.80   | 2.14 | 0.002753 | Dkk3      | dickkopf homolog 3 (Xenopus laevis)                                                                                                    |
| 1450380_at   | 195.10   | 0.046143 P | 468.20   | 0.008057 P | 273.10   | 2.14 | 0.003355 | Epdr1     | expressed sequence AU040950                                                                                                            |
| 1450410_a_at | 195.70   | 0.149658 A | 489.70   | 0.001953 P | 294.00   | 2.14 | 0.000167 | Rik       | 4930570C03                                                                                                                             |
| 1450637_a_at | 692.90   | 0.01416 P  | 1500.80  | 0.000244 P | 807.90   | 2.14 | 0.000023 | Aebp1     | RIKEN cDNA 4930570C03 gene                                                                                                             |
| 1451031_at   | 322.30   | 0.030273 P | 792.90   | 0.005859 P | 470.60   | 2.14 | 0.001486 | Sfrp4     | AE binding protein 1                                                                                                                   |
| 1451109_a_at | 1335.20  | 0.000244 P | 2810.70  | 0.000244 P | 1475.50  | 2.14 | 0.000020 | Nedd4     | secreted frizzled-related sequence protein 4                                                                                           |
| 1452670_at   | 10732.00 | 0.000732 P | 20365.80 | 0.000244 P | 9633.80  | 2.14 | 0.000020 | Myl9      | neural precursor cell expressed, developmentally down-regulated gene 4                                                                 |
| 1453556_x_at | 527.40   | 0.171387 A | 1018.00  | 0.014160 P | 490.60   | 2.14 | 0.000023 | Cd99      | myosin, light polypeptide 9, regulatory                                                                                                |
| 1453960_a_at | 695.90   | 0.008057 P | 1290.30  | 0.000244 P | 594.40   | 2.14 | 0.000027 | Capzb     | RIKEN cDNA 2410026K10 gene                                                                                                             |
| 1454268_a_at | 337.40   | 0.008057 P | 676.50   | 0.000244 P | 339.10   | 2.14 | 0.000552 | Cyba      | cytochrome b-245, alpha polypeptide                                                                                                    |
| 1455556_at   | 335.80   | 0.008057 P | 1237.00  | 0.000732 P | 901.20   | 2.14 | 0.000046 | Notch2    | RIKEN cDNA 9530072E15 gene                                                                                                             |
| 1455725_a_at | 2266.20  | 0.000244 P | 4673.80  | 0.000244 P | 2407.60  | 2.14 | 0.000020 | H3f3b     | H3 histone, family 3B                                                                                                                  |
| 1455908_a_at | 132.00   | 0.149658 A | 302.50   | 0.000732 P | 170.50   | 2.14 | 0.001336 | Scepp1    | retinoid-inducible serine carboxypeptidase                                                                                             |
| 1460287_at   | 1374.40  | 0.005859 P | 2183.10  | 0.000732 P | 808.70   | 2.14 | 0.000023 | Timp2     | tissue inhibitor of metalloproteinase 2                                                                                                |
| 1415935_at   | 221.90   | 0.067627 A | 677.90   | 0.001953 P | 456.00   | 2.00 | 0.000307 | Smoc2     | SPARC related modular calcium binding 2                                                                                                |
| 1416221_at   | 5038.90  | 0.000244 P | 6497.60  | 0.000244 P | 1458.70  | 2.00 | 0.000046 | Fstl1     | folliculin-like                                                                                                                        |
| 1416625_at   | 1279.30  | 0.001953 P | 2378.10  | 0.000732 P | 1098.80  | 2.00 | 0.000046 | Serp1     | serine (or cysteine) proteinase inhibitor, clade G, member 1                                                                           |
| 1417011_at   | 143.50   | 0.056152 M | 282.10   | 0.036133 P | 138.60   | 2.00 | 0.004481 | Sdc2      | syndecan 2                                                                                                                             |
| 1417240_at   | 1012.00  | 0.000732 P | 2061.50  | 0.000244 P | 1049.50  | 2.00 | 0.000060 | Zyx       | zyxin                                                                                                                                  |
| 1417505_s_at | 594.40   | 0.000244 P | 1204.40  | 0.000244 P | 610.00   | 2.00 | 0.000078 | LOC621887 | IL11ra1 ///                                                                                                                            |
| 1417626_at   | 304.20   | 0.00415 P  | 685.20   | 0.000244 P | 381.00   | 2.00 | 0.000346 | Pde4dip   | IL11ra2 ///                                                                                                                            |
| 1418255_s_at | 140.20   | 0.171387 A | 283.60   | 0.004150 P | 143.40   | 2.00 | 0.003699 | Srf       | interleukin 11 receptor, alpha chain 1                                                                                                 |
| 1418467_at   | 578.80   | 0.000244 P | 1043.90  | 0.000732 P | 465.10   | 2.00 | 0.002753 | Smarcd3   | upregulated during skeletal muscle growth 4                                                                                            |
| 1418758_a_at | 219.70   | 0.00415 P  | 936.60   | 0.000732 P | 716.90   | 2.00 | 0.000167 | Pscd3     | serum response factor                                                                                                                  |
| 1419291_x_at | 393.20   | 0.023926 P | 1203.80  | 0.000244 P | 810.60   | 2.00 | 0.000060 | Gas5      | SWI/SNF related, matrix associated, actin dependent regulator of chromatin, subfamily d, member 3                                      |
| 1419584_at   | 524.20   | 0.000244 P | 1553.10  | 0.001953 P | 1028.90  | 2.00 | 0.000966 | Ttc28     | pleckstrin homology, Sec7 and coiled/coiled domains 3                                                                                  |
| 1420578_at   | 160.40   | 0.27417 A  | 470.20   | 0.000244 P | 309.80   | 2.00 | 0.000020 | Optc      | growth arrest specific 5                                                                                                               |
| 1420871_at   | 422.80   | 0.000732 P | 1299.70  | 0.001953 P | 876.90   | 2.00 | 0.001077 | Gucy1b3   | cDNA sequence BC002262                                                                                                                 |
| 1420896_at   | 222.80   | 0.056152 M | 429.50   | 0.001221 P | 206.70   | 2.00 | 0.000114 | Snap23    | opticin                                                                                                                                |
| 1420897_at   | 88.90    | 0.246094 A | 298.60   | 0.004150 P | 209.70   | 2.00 | 0.000492 | Snap23    | guanylate cyclase 1, soluble, beta 3                                                                                                   |
| 1421375_a_at | 832.30   | 0.000732 P | 1721.70  | 0.000244 P | 889.40   | 2.00 | 0.000020 | S100a6    | synaptosomal-associated protein, 23kD                                                                                                  |
| 1421471_at   | 167.00   | 0.171387 A | 372.50   | 0.001953 P | 205.50   | 2.00 | 0.001832 | Npy1r     | synaptosomal-associated protein, 23kD                                                                                                  |
| 1421889_a_at | 1254.10  | 0.000732 P | 3248.90  | 0.000244 P | 1994.80  | 2.00 | 0.000060 | Aplp2     | S100 calcium binding protein A6 (calyculin)                                                                                            |
| 1422514_at   | 626.10   | 0.056152 M | 1157.70  | 0.000732 P | 531.60   | 2.00 | 0.000020 | Aebp1     | neuropeptide Y receptor Y1                                                                                                             |
| 1422562_at   | 205.10   | 0.219482 A | 459.90   | 0.023926 P | 254.80   | 2.00 | 0.002032 | Rrad      | amyloid beta (A4) precursor-like protein 2                                                                                             |
| 1422847_a_at | 277.60   | 0.067627 A | 455.90   | 0.000732 P | 178.30   | 2.00 | 0.001486 | Prkcd     | AE binding protein 1                                                                                                                   |
| 1423457_at   | 97.00    | 0.366211 A | 239.30   | 0.001221 P | 142.30   | 2.00 | 0.004073 | Slc35a5   | Ras-related associated with diabetes                                                                                                   |
| 1423505_at   | 9881.30  | 0.000244 P | 22326.00 | 0.000244 P | 12444.70 | 2.00 | 0.000020 | Tagln     | protein kinase C, delta                                                                                                                |
| 1424133_at   | 234.90   | 0.303711 A | 430.00   | 0.005859 P | 195.10   | 2.00 | 0.000068 | Tmem98    | RIKEN cDNA 1010001J06 gene                                                                                                             |
| 1424365_at   | 695.60   | 0.000244 P | 1666.80  | 0.000244 P | 971.20   | 2.00 | 0.000023 | ik        | transgelin                                                                                                                             |
| 1424382_at   | 502.10   | 0.005859 P | 1904.40  | 0.000244 P | 1402.30  | 2.00 | 0.000020 | Rcn3      | RIKEN cDNA 6530411B15 gene                                                                                                             |
| 1424394_at   | 568.20   | 0.001221 P | 1055.90  | 0.000732 P | 487.70   | 2.00 | 0.000273 | Selm      | 1810037117R                                                                                                                            |
| 1425339_at   | 279.40   | 0.005859 P | 769.90   | 0.000732 P | 490.50   | 2.00 | 0.000023 | Picb4     | RIKEN cDNA 1810037117 gene                                                                                                             |
| 1425462_at   | 560.00   | 0.00293 P  | 790.00   | 0.000732 P | 230.00   | 2.00 | 0.000307 | Fbxw11    | DNA segment, Chr 7, ERATO Doi 671, expressed                                                                                           |
| 1426285_at   | 298.20   | 0.11572 A  | 722.10   | 0.001221 P | 423.90   | 2.00 | 0.001651 | Lama2     | selenoprotein M                                                                                                                        |
| 1426394_at   | 280.40   | 0.018555 P | 620.50   | 0.002930 P | 340.10   | 2.00 | 0.001486 | Eif3s1    | phospholipase C, beta 4                                                                                                                |
| 1426724_at   | 561.80   | 0.00415 P  | 1228.60  | 0.000244 P | 666.80   | 2.00 | 0.000020 | Cnn3      | F-box and WD-40 domain protein 1B                                                                                                      |
| 1426794_at   | 268.20   | 0.018555 P | 604.60   | 0.001221 P | 336.40   | 2.00 | 0.000030 | Ptprs     | calponin 3, acidic                                                                                                                     |
| 1426853_at   | 850.90   | 0.001221 P | 2469.50  | 0.000244 P | 1618.60  | 2.00 | 0.000030 | Set       | protein tyrosine phosphatase, receptor type, S                                                                                         |
| 1427457_a_at | 83.70    | 0.533936 A | 225.40   | 0.004150 P | 141.70   | 2.00 | 0.000068 | Bmp1      | SET translocation                                                                                                                      |
| 1427762_x_at | 263.10   | 0.067627 A | 480.00   | 0.018555 P | 216.90   | 2.00 | 0.002490 | Hist1h2bp | bone morphogenetic protein 1                                                                                                           |
| 1430514_a_at | 352.30   | 0.018555 P | 771.00   | 0.010742 P | 418.70   | 2.00 | 0.000618 | Cd99      | histone 1, H2bc                                                                                                                        |
| 1432416_a_at | 1823.20  | 0.000732 P | 2564.80  | 0.000244 P | 741.60   | 2.00 | 0.000020 | Npm1      | RIKEN cDNA 2410026K10 gene                                                                                                             |
| 1433543_at   | 166.80   | 0.129639 A | 399.40   | 0.010742 P | 232.60   | 2.00 | 0.000966 | Anln      | RIKEN cDNA 1110037A17 gene                                                                                                             |
| 1433670_at   | 445.10   | 0.046143 P | 1142.30  | 0.000244 P | 697.20   | 2.00 | 0.000060 | Emp2      | epithelial membrane protein 2                                                                                                          |
| 1433693_x_at | 142.90   | 0.246094 A | 270.20   | 0.014160 P | 127.30   | 2.00 | 0.004481 | Vamp3     | RIKEN cDNA D130027G05 gene                                                                                                             |
| 1434180_at   | 1449.10  | 0.001953 P | 2503.70  | 0.000244 P | 1054.60  | 2.00 | 0.000114 | Plekhc1   | hypothetical protein MGC36305                                                                                                          |
| 1434555_at   | 476.70   | 0.095215 A | 1080.60  | 0.010742 P | 603.90   | 2.00 | 0.002490 | Anp32a    | acidic (leucine-rich) nuclear phosphoprotein 32 family, member A                                                                       |
| 1434643_at   | 312.10   | 0.023926 P | 731.10   | 0.000732 P | 419.00   | 2.00 | 0.000101 | Tbl1x     | transducin (beta)-like 1 X-linked                                                                                                      |
| 1434998_at   | 1398.70  | 0.000244 P | 2890.70  | 0.000732 P | 1492.00  | 2.00 | 0.000147 | Iggap1    | Mus musculus 11 days embryo head cDNA, RIKEN full-length enriched library, clone:6230409N14 product:unknown EST, full insert sequence. |
| 1436836_x_at | 1093.60  | 0.00415 P  | 1842.10  | 0.000244 P | 748.50   | 2.00 | 0.000020 | Cnn3      | calponin 3, acidic                                                                                                                     |
| 1438966_x_at | 165.00   | 0.5 A      | 286.20   | 0.005859 P | 121.20   | 2.00 | 0.003041 | Fmod      | fibromodulin                                                                                                                           |
| 1439364_a_at | 325.80   | 0.010742 P | 667.80   | 0.001953 P | 342.00   | 2.00 | 0.000130 | Mmp2      | matrix metalloproteinase 2                                                                                                             |
| 1448196_at   | 129.70   | 0.466064 A | 312.10   | 0.001953 P | 182.40   | 2.00 | 0.000214 | Mat2b     | expressed sequence AI182287                                                                                                            |
| 1448487_at   | 411.00   | 0.018555 P | 1157.40  | 0.004150 P | 746.40   | 2.00 | 0.000618 | Lrrfp1    | leucine rich repeat (in FLII) interacting protein 1                                                                                    |
| 1448755_at   | 298.90   | 0.067627 A | 452.50   | 0.001953 P | 153.60   | 2.00 | 0.000088 | Col15a1   | procollagen, type XV                                                                                                                   |
| 1448770_a_at | 163.10   | 0.129639 A | 303.40   | 0.004150 P | 140.30   | 2.00 | 0.000552 | Atp1f1    | ATPase inhibitor                                                                                                                       |
| 1449015_at   | 504.30   | 0.005859 P | 1074.10  | 0.004150 P | 569.80   | 2.00 | 0.000167 | Retnla    | resistin like alpha                                                                                                                    |
| 1449368_at   | 3276.50  | 0.000244 P | 7394.40  | 0.000244 P | 4117.90  | 2.00 | 0.000020 | Dcn       | decorin                                                                                                                                |
| 1451350_a_at | 251.20   | 0.005859 P | 693.00   | 0.001953 P | 441.80   | 2.00 | 0.000865 | Leprot    | hypothetical protein MGC6694                                                                                                           |
| 1452309_at   | 500.50   | 0.018555 P | 841.30   | 0.000732 P | 340.80   | 2.00 | 0.002250 | LOC677485 | Cgn1 ///                                                                                                                               |
| 1453572_a_at | 831.90   | 0.000732 P | 1829.10  | 0.000244 P | 997.20   | 2.00 | 0.000068 | Pip2      | RIKEN cDNA 4933421H10 gene                                                                                                             |
| 1454613_at   | 564.90   | 0.00415 P  | 1171.90  | 0.000244 P | 607.00   | 2.00 | 0.000130 | Dpys13    | proteolipid protein 2                                                                                                                  |
| 1457285_at   | 255.40   | 0.080566 A | 467.90   | 0.000732 P | 212.50   | 2.00 | 0.000273 | Zfp187    | lymphocyte antigen 6 complex, locus A                                                                                                  |
| 1416136_at   | 389.70   | 0.005859 P | 814.60   | 0.000732 P | 424.90   | 1.87 | 0.000692 | Mmp2      | ESTs                                                                                                                                   |
| 1416210_at   | 327.90   | 0.037598 P | 555.90   | 0.001953 P | 228.00   | 1.87 | 0.000692 | Imp3      | matrix metalloproteinase 2                                                                                                             |
| 1416322_at   | 473.00   | 0.000732 P | 850.90   | 0.002930 P | 377.90   | 1.87 | 0.001336 | Prelp     | RIKEN cDNA 1190002L16 gene                                                                                                             |
| 1416735_at   | 495.00   | 0.037598 P | 1012.90  | 0.004150 P | 517.90   | 1.87 | 0.000147 | Asah1     | proline arginine-rich end leucine-rich repeat                                                                                          |
| 1416741_at   | 145.30   | 0.27417 A  | 417.90   | 0.004150 P | 272.60   | 1.87 | 0.000692 | Col5a1    | N-acylsphingosine amidohydrolase 1                                                                                                     |
| 1416846_a_at | 230.20   | 0.056152 M | 419.80   | 0.000732 P | 189.60   | 1.87 | 0.003699 | Pdzrn3    | procollagen, type V, alpha 1                                                                                                           |
| 1416927_at   | 227.00   | 0.19458 A  | 445.30   | 0.000732 P | 218.30   | 1.87 | 0.001832 | Trp53inp1 | semaF cytoplasmic domain associated protein 3                                                                                          |
| 1417126_a_at | 437.10   | 0.008057 P | 1437.70  | 0.004150 P | 1000.60  | 1.87 | 0.000492 | Rpl22i1   | stress induced protein                                                                                                                 |
| 1417204_at   | 2219.60  | 0.000244 P | 4717.40  | 0.000732 P | 2497.80  | 1.87 | 0.000060 | Kdelr2    | RIKEN cDNA 3110001N18 gene                                                                                                             |
| 1417311_at   | 1218.30  | 0.000244 P | 2156.40  | 0.000244 P | 938.10   | 1.87 | 0.000189 | Crip2     | RIKEN cDNA 1110007A14 gene                                                                                                             |
| 1417872_at   | 5795.40  | 0.000244 P | 9732.80  | 0.000244 P | 3937.40  | 1.87 | 0.000020 | Fhl1      | RIKEN cDNA 1110007A14 gene                                                                                                             |
| 1417879_at   | 175.90   | 0.149658 A | 565.60   | 0.000244 P | 389.70   | 1.87 | 0.000307 | Nenf      | cysteine rich protein 2                                                                                                                |
| 1418021_at   | 248.60   | 0.037598 P | 655.90   | 0.000244 P | 407.30   | 1.87 | 0.000101 | LOC675521 | four and a half LIM domains 1                                                                                                          |

|              |          |          |   |          |          |   |         |      |          |                                                       |                                                                                                                                                                                        |
|--------------|----------|----------|---|----------|----------|---|---------|------|----------|-------------------------------------------------------|----------------------------------------------------------------------------------------------------------------------------------------------------------------------------------------|
| 1418448_at   | 1655.90  | 0.000732 | P | 2442.90  | 0.000244 | P | 787.00  | 1.87 | 0.000046 | Rras                                                  | Harvey rat sarcoma oncogene, subgroup R                                                                                                                                                |
| 1418888_a_at | 1210.00  | 0.000732 | P | 1857.60  | 0.000244 | P | 647.60  | 1.87 | 0.000030 | Sepr1                                                 | selenoprotein R                                                                                                                                                                        |
| 1419554_at   | 349.80   | 0.046143 | P | 710.50   | 0.001953 | P | 360.70  | 1.87 | 0.000189 | Cd47                                                  | CD47 antigen (Rh-related antigen, integrin-associated signal transducer)                                                                                                               |
| 1420376_a_at | 1144.30  | 0.000244 | P | 2143.80  | 0.000244 | P | 999.50  | 1.87 | 0.000035 | H3f3b                                                 | H3 histone, family 3B                                                                                                                                                                  |
| 1420900_a_at | 987.10   | 0.000244 | P | 1527.30  | 0.000244 | P | 540.20  | 1.87 | 0.000020 | Rab18                                                 | RAB18, member RAS oncogene family                                                                                                                                                      |
| 1421321_a_at | 344.20   | 0.00415  | P | 748.20   | 0.000732 | P | 404.00  | 1.87 | 0.000307 | Net1                                                  | neuroepithelial cell transforming gene 1                                                                                                                                               |
| 1421374_a_at | 2764.70  | 0.000732 | P | 4112.00  | 0.000244 | P | 1347.30 | 1.87 | 0.000189 | Fxyd1                                                 | FXYP domain-containing ion transport regulator 1                                                                                                                                       |
| 1422495_a_at | 1508.90  | 0.001221 | P | 3130.10  | 0.000732 | P | 1621.20 | 1.87 | 0.000030 | Hmgn1                                                 | high mobility group nucleosomal binding domain 1                                                                                                                                       |
| 1422576_at   | 525.70   | 0.001953 | P | 909.80   | 0.000244 | P | 384.10  | 1.87 | 0.000078 | Atxn10                                                | spinocerebellar ataxia 10 homolog (human)                                                                                                                                              |
| 1423100_at   | 510.60   | 0.000244 | P | 1501.80  | 0.000732 | P | 991.20  | 1.87 | 0.000241 | Fos                                                   | FBJ osteosarcoma oncogene                                                                                                                                                              |
| 1423335_at   | 536.50   | 0.001953 | P | 1005.20  | 0.000244 | P | 468.70  | 1.87 | 0.000147 | Rik                                                   | 1110004F10<br>small acidic protein                                                                                                                                                     |
| 1423368_at   | 3673.70  | 0.000244 | P | 7002.10  | 0.000244 | P | 3328.40 | 1.87 | 0.000027 | Laptn4a                                               | lysosomal-associated protein transmembrane 4A                                                                                                                                          |
| 1423398_at   | 114.50   | 0.366211 | A | 358.60   | 0.010742 | P | 244.10  | 1.87 | 0.002250 | Taf12                                                 | TAF12 RNA polymerase II, TATA box binding protein (TBP)-associated factor, 20 kDa                                                                                                      |
| 1423721_at   | 2123.30  | 0.000244 | P | 3968.70  | 0.000732 | P | 1845.40 | 1.87 | 0.000027 | Tpm1                                                  | tropomyosin 1, alpha                                                                                                                                                                   |
| 1423725_at   | 511.20   | 0.018555 | P | 890.00   | 0.008057 | P | 378.80  | 1.87 | 0.000389 | Pls3                                                  | expressed sequence A1115446                                                                                                                                                            |
| 1424269_a_at | 14081.60 | 0.000244 | P | 20613.10 | 0.000244 | P | 6531.50 | 1.87 | 0.000020 | EG433297 ///<br>EG667952 ///<br>LOC671953<br>/// Myl6 | myosin light chain, alkali, nonmuscle                                                                                                                                                  |
| 1424407_s_at | 249.10   | 0.008057 | P | 567.50   | 0.000732 | P | 318.40  | 1.87 | 0.003699 | Cbx6                                                  | RIKEN cDNA 120009K17 gene                                                                                                                                                              |
| 1424562_a_at | 3917.00  | 0.000244 | P | 7585.90  | 0.000244 | P | 3668.90 | 1.87 | 0.000189 | Slc25a4                                               | solute carrier family 25 (mitochondrial carrier; adenine nucleotide translocator), member 4                                                                                            |
| 1424670_s_at | 294.40   | 0.008057 | P | 701.10   | 0.001221 | P | 406.70  | 1.87 | 0.000214 | Zfyve21                                               | RIKEN cDNA 1110013H04 gene                                                                                                                                                             |
| 1424769_s_at | 2556.30  | 0.00293  | P | 4142.80  | 0.000244 | P | 1586.50 | 1.87 | 0.000030 | Cald1                                                 | Mus musculus 0 day neonate head cDNA, RIKEN full-length enriched library, clone:4833423D12 product:unknown EST, full insert sequence.                                                  |
| 1424955_at   | 173.00   | 0.219482 | A | 346.40   | 0.000732 | P | 173.40  | 1.87 | 0.002250 | Ccdc5                                                 | hypothetical protein MGC36238                                                                                                                                                          |
| 1425493_at   | 201.50   | 0.129639 | A | 324.00   | 0.000244 | P | 122.50  | 1.87 | 0.000492 | Bmpr1a                                                | bone morphogenetic protein receptor, type 1A                                                                                                                                           |
| 1425506_at   | 1853.40  | 0.000244 | P | 3955.50  | 0.000732 | P | 2102.10 | 1.87 | 0.000088 | Mylk                                                  | RIKEN cDNA 9530072E15 gene                                                                                                                                                             |
| 1425542_a_at | 247.80   | 0.023926 | P | 550.10   | 0.000244 | P | 302.30  | 1.87 | 0.001336 | Ppp2r5c                                               | protein phosphatase 2, regulatory subunit B (B56), gamma isoform                                                                                                                       |
| 1426248_at   | 351.50   | 0.111572 | A | 516.30   | 0.000732 | P | 164.80  | 1.87 | 0.000101 | Stk24                                                 | FERMRhoGEF (Arhgef) and pleckstrin domain protein 1 (chondrocyte-derived)                                                                                                              |
| 1426373_at   | 338.60   | 0.008057 | P | 695.90   | 0.000244 | P | 357.30  | 1.87 | 0.000101 | Ski                                                   | Sloan-Kettering viral oncogene homolog                                                                                                                                                 |
| 1426758_s_at | 294.00   | 0.00415  | P | 467.90   | 0.000732 | P | 173.90  | 1.87 | 0.000307 | Gti2                                                  | maternally expressed gene 3                                                                                                                                                            |
| 1426855_at   | 261.00   | 0.149658 | A | 450.40   | 0.014160 | P | 189.40  | 1.87 | 0.002032 | D10Ert610e                                            | DNA segment, Chr 10, ERATO Doi 610, expressed                                                                                                                                          |
| 1426955_at   | 1020.90  | 0.000244 | P | 1933.70  | 0.000244 | P | 912.80  | 1.87 | 0.000052 | Col18a1                                               | procollagen, type XVIII, alpha 1                                                                                                                                                       |
| 1426976_at   | 337.20   | 0.008057 | P | 709.00   | 0.001953 | P | 371.80  | 1.87 | 0.002490 | Usp47                                                 | RIKEN cDNA 4930502N04 gene                                                                                                                                                             |
| 1427020_at   | 256.40   | 0.046143 | P | 433.90   | 0.000244 | P | 177.50  | 1.87 | 0.000088 | Scara3                                                | RIKEN cDNA C130058N24 gene                                                                                                                                                             |
| 1427108_at   | 850.50   | 0.001953 | P | 1688.10  | 0.001953 | P | 837.60  | 1.87 | 0.000027 | Rik                                                   | 9530068E07<br>hypothetical protein MGC28751                                                                                                                                            |
| 1428257_s_at | 674.50   | 0.001953 | P | 1640.60  | 0.000732 | P | 966.10  | 1.87 | 0.000309 | Dynlrb1                                               | dynein, cytoplasmic, light chain 2A                                                                                                                                                    |
| 1428311_at   | 421.90   | 0.00415  | P | 997.00   | 0.000732 | P | 575.10  | 1.87 | 0.000052 | Ccdc6                                                 | RIKEN cDNA 2810012H18 gene                                                                                                                                                             |
| 1428621_a_at | 640.20   | 0.018555 | P | 1065.80  | 0.001221 | P | 425.60  | 1.87 | 0.000189 | Vps25                                                 | DNA segment, Chr 11, Wayne State University 68, expressed                                                                                                                              |
| 1428850_x_at | 635.70   | 0.005859 | P | 1211.60  | 0.000244 | P | 575.90  | 1.87 | 0.000023 | Cd99                                                  | RIKEN cDNA 2410026K10 gene                                                                                                                                                             |
| 1430020_x_at | 333.60   | 0.00293  | P | 925.00   | 0.001221 | P | 591.40  | 1.87 | 0.003699 | Hnrpa1                                                | heterogeneous nuclear ribonucleoprotein A1                                                                                                                                             |
| 1432417_a_at | 303.10   | 0.023926 | P | 455.60   | 0.000732 | P | 152.50  | 1.87 | 0.000046 | Tspan2                                                | RIKEN cDNA 6330415F13 gene                                                                                                                                                             |
| 1433507_a_at | 165.30   | 0.067627 | A | 421.20   | 0.000732 | P | 255.90  | 1.87 | 0.000273 | Hmgn2                                                 | high mobility group nucleosomal binding domain 2                                                                                                                                       |
| 1433662_s_at | 1258.30  | 0.000244 | P | 2532.30  | 0.000244 | P | 1274.00 | 1.87 | 0.000020 | Timp2                                                 | tissue inhibitor of metalloproteinase 2                                                                                                                                                |
| 1434205_at   | 166.00   | 0.166016 | A | 373.70   | 0.008057 | P | 207.70  | 1.87 | 0.000389 | Ppp2r5c                                               | RIKEN cDNA 2610043M05 gene                                                                                                                                                             |
| 1436316_at   | 1618.50  | 0.000732 | P | 2614.00  | 0.000244 | P | 995.50  | 1.87 | 0.000046 | Rik                                                   | 9430029L20<br>RIKEN cDNA 9430029L20 gene                                                                                                                                               |
| 1437465_a_at | 1272.10  | 0.000244 | P | 2110.30  | 0.000244 | P | 838.20  | 1.87 | 0.000189 | P4hb                                                  | prolyl 4-hydroxylase, beta polypeptide                                                                                                                                                 |
| 1439380_x_at | 1181.10  | 0.000244 | P | 1612.60  | 0.000244 | P | 431.50  | 1.87 | 0.000052 | Gti2                                                  | Mus musculus, clone IMAGE:5357967, mRNA                                                                                                                                                |
| 1439381_x_at | 1112.20  | 0.095215 | A | 1516.30  | 0.018555 | P | 404.10  | 1.87 | 0.000618 | Marveld1                                              | Mus musculus adult male corpus striatum cDNA, RIKEN full-length enriched library, clone:C030005I21 product:HYPOTHETICAL 18.9 KDA PROTEIN homolog [Homo sapiens], full insert sequence. |
| 1448361_at   | 415.40   | 0.046143 | P | 741.70   | 0.000244 | P | 326.30  | 1.87 | 0.000052 | Ttc3                                                  | tetratricopeptide repeat domain                                                                                                                                                        |
| 1448507_at   | 531.00   | 0.000732 | P | 1613.40  | 0.000244 | P | 1082.40 | 1.87 | 0.000214 | Efh1                                                  | RIKEN cDNA 4931430I01 gene                                                                                                                                                             |
| 1448536_at   | 564.80   | 0.00293  | P | 691.50   | 0.000244 | P | 126.70  | 1.87 | 0.001651 | Lsm3                                                  | RIKEN cDNA 1010001J12 gene                                                                                                                                                             |
| 1448682_at   | 814.90   | 0.000244 | P | 1736.50  | 0.000244 | P | 921.60  | 1.87 | 0.000389 | Dynl1                                                 | dynein, cytoplasmic, light chain 1                                                                                                                                                     |
| 1449437_at   | 127.30   | 0.095215 | A | 283.30   | 0.000732 | P | 156.00  | 1.87 | 0.000438 | D6Wsu163e                                             | DNA segment, Chr 6, Wayne State University 163, expressed                                                                                                                              |
| 1449632_s_at | 205.00   | 0.080566 | A | 379.50   | 0.004150 | P | 174.50  | 1.87 | 0.003355 | Fkbp10                                                | FK506 binding protein 10                                                                                                                                                               |
| 1450388_s_at | 626.50   | 0.008057 | P | 1461.90  | 0.000244 | P | 835.40  | 1.87 | 0.000027 | Twsg1                                                 | twisted gastrulation protein                                                                                                                                                           |
| 1450431_a_at | 3568.90  | 0.000244 | P | 8568.90  | 0.000244 | P | 5000.00 | 1.87 | 0.000020 | Nedd4                                                 | neural precursor cell expressed, developmentally down-regulated gene 4                                                                                                                 |
| 1450768_at   | 81.10    | 0.303711 | A | 260.70   | 0.002930 | P | 179.60  | 1.87 | 0.003355 | Dlg1                                                  | discs, large homolog 1 (Drosophila)                                                                                                                                                    |
| 1451006_at   | 170.30   | 0.246094 | A | 306.80   | 0.002930 | P | 136.50  | 1.87 | 0.002753 | Xdh                                                   | xanthine dehydrogenase                                                                                                                                                                 |
| 1451204_at   | 356.90   | 0.010742 | P | 901.10   | 0.001953 | P | 544.20  | 1.87 | 0.000307 | Scara5                                                | RIKEN cDNA 4933425F03 gene                                                                                                                                                             |
| 1452381_at   | 256.20   | 0.005615 | P | 582.80   | 0.001953 | P | 326.60  | 1.87 | 0.004481 | Creb3l2                                               | Mus musculus 3 days neonate thymus cDNA, RIKEN full-length enriched library, clone:A630029B16 product:unknown EST, full insert sequence.                                               |
| 1452401_at   | 463.20   | 0.091553 | A | 640.90   | 0.002930 | P | 177.70  | 1.87 | 0.000241 | Wtap                                                  | Wilms' tumour 1-associating protein                                                                                                                                                    |
| 1452587_at   | 1749.50  | 0.000244 | P | 2440.30  | 0.000244 | P | 690.80  | 1.87 | 0.000492 | Actr2                                                 | ARP2 actin-related protein 2 homolog (yeast)                                                                                                                                           |
| 1452659_at   | 360.00   | 0.008057 | P | 926.20   | 0.000244 | P | 566.20  | 1.87 | 0.000027 | Dek                                                   | RIKEN cDNA 1810019E15 gene                                                                                                                                                             |
| 1453839_a_at | 562.10   | 0.067627 | A | 1124.20  | 0.008057 | P | 562.10  | 1.87 | 0.000438 | Pi16                                                  | RIKEN cDNA 1200009H11 gene                                                                                                                                                             |
| 1454610_at   | 550.70   | 0.000732 | P | 1041.00  | 0.000244 | P | 490.30  | 1.87 | 0.000273 | Sept7                                                 | septin 7                                                                                                                                                                               |
| 1455792_x_at | 244.80   | 0.037598 | P | 437.20   | 0.000244 | P | 192.40  | 1.87 | 0.000618 | Ndn                                                   | neclidin                                                                                                                                                                               |
| 1455826_a_at | 202.00   | 0.111572 | A | 336.40   | 0.002930 | P | 134.40  | 1.87 | 0.001486 | Bace1                                                 | beta-site APP cleaving enzyme                                                                                                                                                          |
| 1456080_a_at | 353.50   | 0.008057 | P | 694.30   | 0.000244 | P | 340.80  | 1.87 | 0.000438 | Serinc3                                               | tumor differentially expressed 1                                                                                                                                                       |
| 1456380_x_at | 420.30   | 0.056152 | M | 781.60   | 0.005859 | P | 361.30  | 1.87 | 0.000438 | Cnn3                                                  | calponin 3, acidic                                                                                                                                                                     |
| 1460182_at   | 199.80   | 0.001221 | P | 473.50   | 0.002930 | P | 273.70  | 1.87 | 0.003355 | Snx4                                                  | sorting nexin 4                                                                                                                                                                        |
| 1415915_at   | 525.20   | 0.000244 | P | 692.00   | 0.000244 | P | 166.80  | 1.74 | 0.000774 | Ddx1                                                  | DEAD/H (Asp-Glu-Ala-Asp/His) box polypeptide 1                                                                                                                                         |
| 1416165_at   | 202.80   | 0.266846 | A | 351.90   | 0.001953 | P | 149.10  | 1.74 | 0.000492 | Rab31                                                 | RIKEN cDNA 1700093E07 gene                                                                                                                                                             |
| 1416256_a_at | 1291.80  | 0.000732 | P | 2339.70  | 0.000244 | P | 1047.90 | 1.74 | 0.000492 | Tubb5                                                 | tubulin, beta 5                                                                                                                                                                        |
| 1416525_at   | 388.30   | 0.001953 | P | 947.10   | 0.000244 | P | 558.80  | 1.74 | 0.000020 | Spop                                                  | speckle-type POZ protein                                                                                                                                                               |
| 1416630_at   | 1159.40  | 0.001221 | P | 2288.50  | 0.000732 | P | 1129.10 | 1.74 | 0.000167 | Id3                                                   | inhibitor of DNA binding 3                                                                                                                                                             |
| 1416884_at   | 277.90   | 0.030273 | P | 845.00   | 0.002930 | P | 567.10  | 1.74 | 0.000692 | EG629578<br>Cbx3 ///                                  | chromobox homolog 3 (Drosophila HP1 gamma)                                                                                                                                             |
| 1417013_at   | 280.50   | 0.001953 | P | 405.10   | 0.000244 | P | 124.60  | 1.74 | 0.003699 | Hspb8                                                 | crystallin, alpha C                                                                                                                                                                    |
| 1417133_at   | 1802.10  | 0.000244 | P | 3484.60  | 0.000244 | P | 1682.50 | 1.74 | 0.000030 | Pmp22                                                 | peripheral myelin protein, 22 kDa                                                                                                                                                      |



|              |         |          |   |         |          |   |         |      |          |                                                                         |                                                                                                                                                                  |
|--------------|---------|----------|---|---------|----------|---|---------|------|----------|-------------------------------------------------------------------------|------------------------------------------------------------------------------------------------------------------------------------------------------------------|
| 1417339_a_at | 1068.70 | 0.000732 | P | 1618.60 | 0.000244 | P | 549.90  | 1.74 | 0.000189 | Dynl1 /// EG627788 /// LOC672375                                        | dynein, cytoplasmic, light chain 1                                                                                                                               |
| 1417399_at   | 734.50  | 0.000244 | P | 1306.00 | 0.000244 | P | 571.50  | 1.74 | 0.000346 | Gas6                                                                    | growth arrest specific 6                                                                                                                                         |
| 1417836_at   | 234.70  | 0.303711 | A | 400.70  | 0.001953 | P | 166.00  | 1.74 | 0.000492 | Gpx7                                                                    | RIKEN cDNA 3110050F08 gene                                                                                                                                       |
| 1418181_at   | 242.70  | 0.018555 | P | 515.90  | 0.000244 | P | 273.20  | 1.74 | 0.000865 | pTtp4a3                                                                 | protein tyrosine phosphatase 4a3                                                                                                                                 |
| 1418455_at   | 294.10  | 0.046143 | P | 420.70  | 0.002930 | P | 126.60  | 1.74 | 0.001201 | Copz2                                                                   | coatamer protein complex, subunit zeta 2                                                                                                                         |
| 1418621_at   | 1008.30 | 0.000244 | P | 2065.80 | 0.001221 | P | 1057.50 | 1.74 | 0.002032 | Rab2                                                                    | RAB2, member RAS oncogene family                                                                                                                                 |
| 1418841_s_at | 319.90  | 0.219482 | A | 594.00  | 0.037598 | P | 274.10  | 1.74 | 0.000307 | Cdc21                                                                   | cell division cycle 2 homolog (S. pombe)-like 2                                                                                                                  |
| 1418884_x_at | 1069.10 | 0.00293  | P | 1719.10 | 0.000732 | P | 650.00  | 1.74 | 0.000078 | Tuba1a                                                                  | tubulin, alpha 1                                                                                                                                                 |
| 1419470_at   | 470.50  | 0.001221 | P | 852.30  | 0.000244 | P | 381.80  | 1.74 | 0.001336 | Gnb4                                                                    | guanine nucleotide binding protein, beta 4                                                                                                                       |
| 1420811_a_at | 3672.70 | 0.000732 | P | 5347.70 | 0.000244 | P | 1675.00 | 1.74 | 0.000346 | Ctnnb1                                                                  | catenin beta                                                                                                                                                     |
| 1420828_s_at | 1440.20 | 0.00293  | P | 3643.90 | 0.000244 | P | 2203.70 | 1.74 | 0.000023 | Ywhaq                                                                   | tyrosine 3-monooxygenase/tryptophan 5-monooxygenase activation protein, theta polypeptide                                                                        |
| 1420829_a_at | 361.70  | 0.00415  | P | 656.00  | 0.000244 | P | 294.30  | 1.74 | 0.001077 | Ywhaq                                                                   | tyrosine 3-monooxygenase/tryptophan 5-monooxygenase activation protein, theta polypeptide                                                                        |
| 1420832_at   | 721.90  | 0.067627 | A | 1387.00 | 0.005859 | P | 665.10  | 1.74 | 0.000774 | Qscn6                                                                   | quiescin Q6                                                                                                                                                      |
| 1421027_a_at | 89.00   | 0.398926 | A | 291.20  | 0.014160 | P | 202.20  | 1.74 | 0.004073 | Mef2c                                                                   | myocyte enhancer factor 2C                                                                                                                                       |
| 1421290_at   | 236.10  | 0.046143 | P | 527.50  | 0.000244 | P | 291.40  | 1.74 | 0.000023 | Hspb7                                                                   | heat shock protein family, member 7 (cardiovascular)                                                                                                             |
| 1422245_a_at | 118.20  | 0.303711 | A | 254.80  | 0.000244 | P | 136.60  | 1.74 | 0.000389 | Mvri1                                                                   | MRV integration site 1                                                                                                                                           |
| 1422642_at   | 364.60  | 0.005859 | P | 616.50  | 0.001221 | P | 251.90  | 1.74 | 0.001486 | Cdc42ep3                                                                | CDC42 effector protein (Rho GTPase binding) 3                                                                                                                    |
| 1423132_a_at | 343.10  | 0.005859 | P | 686.40  | 0.000732 | P | 343.30  | 1.74 | 0.001832 | 5730427N09 Rik /// EG433230 /// LOC636306                               | RIKEN cDNA 5730427N09 gene                                                                                                                                       |
| 1423262_a_at | 1078.10 | 0.001953 | P | 1690.20 | 0.000732 | P | 612.10  | 1.74 | 0.000101 | LOC670535                                                               | H3 histone, family 3A                                                                                                                                            |
| 1423392_at   | 1147.30 | 0.005859 | P | 1816.10 | 0.000244 | P | 668.80  | 1.74 | 0.000020 | Clic4                                                                   | chloride intracellular channel 4 (mitochondrial)                                                                                                                 |
| 1423490_at   | 211.60  | 0.01416  | P | 548.50  | 0.004150 | P | 336.90  | 1.74 | 0.002250 | Fbxo3                                                                   | F-box only protein 3                                                                                                                                             |
| 1423493_a_at | 346.20  | 0.005859 | P | 837.40  | 0.001953 | P | 491.20  | 1.74 | 0.004481 | Nfix                                                                    | nuclear factor I/X                                                                                                                                               |
| 1423771_at   | 506.90  | 0.00293  | P | 939.40  | 0.000244 | P | 432.50  | 1.74 | 0.000078 | Prkcdpb                                                                 | RIKEN cDNA 6330514M23 gene                                                                                                                                       |
| 1424130_a_at | 3020.60 | 0.000732 | P | 6963.30 | 0.000244 | P | 3942.70 | 1.74 | 0.000020 | Ptrf                                                                    |                                                                                                                                                                  |
| 1424567_at   | 277.40  | 0.018555 | P | 717.00  | 0.002930 | P | 439.60  | 1.74 | 0.001336 | Tspan2                                                                  | RIKEN cDNA 6330415F13 gene                                                                                                                                       |
| 1425299_s_at | 719.20  | 0.000732 | P | 1065.30 | 0.000732 | P | 346.10  | 1.74 | 0.004481 | 0610038D11 Rik /// EG665860 /// LOC623390                               | Mus musculus, Similar to RIKEN cDNA 0610038D11 gene, clone MGC:30341 IMAGE:4162006, mRNA, complete cds                                                           |
| 1425491_at   | 208.50  | 0.080566 | A | 418.90  | 0.001221 | P | 210.40  | 1.74 | 0.000438 | Bmpr1a                                                                  | bone morphogenetic protein receptor, type 1A                                                                                                                     |
| 1425567_a_at | 1458.10 | 0.001221 | P | 2999.20 | 0.000244 | P | 1541.10 | 1.74 | 0.000030 | Anxa5                                                                   | annexin A5                                                                                                                                                       |
| 1425652_s_at | 163.30  | 0.067627 | A | 347.60  | 0.010742 | P | 184.30  | 1.74 | 0.002032 | Rbpms                                                                   | RNA binding protein gene with multiple splicing transforming, acidic coiled-coil containing protein 2                                                            |
| 1425745_a_at | 778.20  | 0.000244 | P | 1561.20 | 0.000244 | P | 783.00  | 1.74 | 0.000189 | Tacc2                                                                   |                                                                                                                                                                  |
| 1426380_at   | 694.60  | 0.000732 | P | 1391.40 | 0.000244 | P | 696.80  | 1.74 | 0.000167 | Eif4b                                                                   | RIKEN cDNA 2310046H11 gene                                                                                                                                       |
| 1426481_at   | 243.10  | 0.046143 | P | 442.00  | 0.000244 | P | 198.90  | 1.74 | 0.000865 | Kihl22                                                                  | RIKEN cDNA 2610318I18 gene                                                                                                                                       |
| 1426987_at   | 152.10  | 0.466064 | A | 385.20  | 0.023926 | P | 233.10  | 1.74 | 0.003699 | Rik                                                                     | RIKEN cDNA 5430417L22 gene                                                                                                                                       |
| 1427177_at   | 490.30  | 0.010742 | P | 688.10  | 0.001953 | P | 197.80  | 1.74 | 0.000438 | Fyco1                                                                   | FYVE and coiled-coil domain containing 1                                                                                                                         |
| 1427894_at   | 216.60  | 0.219482 | A | 496.70  | 0.000244 | P | 280.10  | 1.74 | 0.000023 | Vasn                                                                    | Slit-like 2 (Drosophila)                                                                                                                                         |
| 1428538_s_at | 1093.90 | 0.000244 | P | 2034.70 | 0.000244 | P | 940.80  | 1.74 | 0.000147 | Rarres2                                                                 | RIKEN cDNA 0610007L05 gene                                                                                                                                       |
| 1433476_at   | 701.70  | 0.001953 | P | 1261.50 | 0.000244 | P | 559.80  | 1.74 | 0.000552 | C78339                                                                  | Mus musculus cDNA, RIKEN full-length enriched library, clone:G630067C08 product:AUTOSOMAL HIGHLY CONSERVED PROTEIN homolog [Homo sapiens], full insert sequence. |
| 1434181_at   | 1172.60 | 0.000244 | P | 2012.40 | 0.000244 | P | 839.80  | 1.74 | 0.000167 | Plekhc1                                                                 | hypothetical protein MGC36305                                                                                                                                    |
| 1435494_s_at | 237.20  | 0.001953 | P | 344.80  | 0.000244 | P | 107.60  | 1.74 | 0.000307 | Dsp                                                                     | expressed sequence AA407887                                                                                                                                      |
| 1437161_x_at | 836.60  | 0.00415  | P | 2165.50 | 0.000244 | P | 1328.90 | 1.74 | 0.000027 | Rbpms                                                                   | RNA binding protein gene with multiple splicing                                                                                                                  |
| 1437458_x_at | 1879.90 | 0.00293  | P | 3063.80 | 0.000732 | P | 1183.90 | 1.74 | 0.000068 | Clu                                                                     | clusterin                                                                                                                                                        |
| 1437689_x_at | 1033.50 | 0.001953 | P | 1953.00 | 0.000244 | P | 919.50  | 1.74 | 0.001077 | Clu                                                                     | clusterin                                                                                                                                                        |
| 1438000_x_at | 431.60  | 0.00293  | P | 859.80  | 0.000244 | P | 428.20  | 1.74 | 0.000020 | Zfp622                                                                  | DNA segment, Chr 15, ERATO Doi 806, expressed                                                                                                                    |
| 1448231_at   | 115.10  | 0.533936 | A | 327.70  | 0.000244 | P | 212.60  | 1.74 | 0.000130 | Fkbp5                                                                   | FK506 binding protein 5                                                                                                                                          |
| 1448300_at   | 575.50  | 0.000732 | P | 929.90  | 0.000244 | P | 354.40  | 1.74 | 0.000114 | Mgst3                                                                   | microsomal glutathione S-transferase 3                                                                                                                           |
| 1448433_a_at | 229.80  | 0.037598 | P | 386.90  | 0.000732 | P | 157.10  | 1.74 | 0.000966 | Pcolce                                                                  | procollagen C-proteinase enhancer protein                                                                                                                        |
| 1448613_at   | 679.80  | 0.008057 | P | 1267.00 | 0.000732 | P | 587.20  | 1.74 | 0.000189 | Ecm1                                                                    | extracellular matrix protein 1                                                                                                                                   |
| 1449396_at   | 1338.00 | 0.000732 | P | 2183.10 | 0.001221 | P | 845.10  | 1.74 | 0.002490 | Aoc3                                                                    | amine oxidase, copper containing 3                                                                                                                               |
| 1450376_at   | 241.40  | 0.067627 | A | 493.00  | 0.000732 | P | 251.60  | 1.74 | 0.002490 | Mxi1                                                                    | Max interacting protein 1                                                                                                                                        |
| 1450409_a_at | 431.50  | 0.018555 | P | 747.10  | 0.000732 | P | 315.60  | 1.74 | 0.003355 | Rik                                                                     | RIKEN cDNA 4930570C03 gene                                                                                                                                       |
| 1451162_at   | 1573.00 | 0.000244 | P | 2131.30 | 0.000244 | P | 558.30  | 1.74 | 0.002490 | Hsbp1                                                                   |                                                                                                                                                                  |
| 1453238_s_at | 2704.70 | 0.000732 | P | 3993.00 | 0.000732 | P | 1288.30 | 1.74 | 0.000147 | 1200016E24 Rik /// 3930401B19 Rik /// A130040M12 Rik /// E430024C06 Rik |                                                                                                                                                                  |
| 1454967_at   | 392.80  | 0.00415  | P | 565.80  | 0.000244 | P | 173.00  | 1.74 | 0.000966 | ---                                                                     | ESTs, Weakly similar to A61208 chondroitin sulfate proteoglycan NG2 - rat [R.norvegicus]                                                                         |
| 1454974_at   | 468.20  | 0.001953 | P | 787.60  | 0.000244 | P | 319.40  | 1.74 | 0.000214 | Ntn1                                                                    | Mus musculus, clone IMAGE:3670705, mRNA                                                                                                                          |
| 1455069_x_at | 2724.40 | 0.000244 | P | 4980.90 | 0.000244 | P | 2256.50 | 1.74 | 0.000147 | Slc25a4                                                                 | solute carrier family 25 (mitochondrial carrier; adenine nucleotide translocator), member 4                                                                      |
| 1455090_at   | 760.70  | 0.056152 | M | 1009.10 | 0.001953 | P | 248.40  | 1.74 | 0.000214 | Angptl2                                                                 | angiopoietin-like 2                                                                                                                                              |
| 1456292_a_at | 2438.00 | 0.000244 | P | 3789.80 | 0.000244 | P | 1351.80 | 1.74 | 0.000078 | Vim                                                                     | vimentin                                                                                                                                                         |
| 1415751_at   | 485.40  | 0.00415  | P | 699.30  | 0.000244 | P | 213.90  | 1.62 | 0.000147 | Hp1bp3                                                                  | heterochromatin protein 1, binding protein 3                                                                                                                     |
| 1415812_at   | 5393.50 | 0.000244 | P | 7887.90 | 0.000244 | P | 2494.40 | 1.62 | 0.000214 | Gsn                                                                     | gelsolin                                                                                                                                                         |
| 1415838_at   | 716.70  | 0.00415  | P | 1685.90 | 0.000244 | P | 969.20  | 1.62 | 0.000078 | Serinc1                                                                 | tumor differentially expressed 1, like                                                                                                                           |
| 1415852_at   | 241.80  | 0.010742 | P | 406.80  | 0.000244 | P | 165.00  | 1.62 | 0.004073 | Impdh2                                                                  | inosine 5'-phosphate dehydrogenase 2                                                                                                                             |

|              |          |            |          |            |         |      |          |           |                                                                                                                                                          |
|--------------|----------|------------|----------|------------|---------|------|----------|-----------|----------------------------------------------------------------------------------------------------------------------------------------------------------|
| 1416156_at   | 1278.60  | 0.000244 P | 2653.40  | 0.000244 P | 1374.80 | 1.62 | 0.000020 | Vcl       | vinculin                                                                                                                                                 |
| 1416191_at   | 269.80   | 0.19458 A  | 588.80   | 0.030273 P | 319.00  | 1.62 | 0.003355 | Sec61a1   | SEC61, alpha subunit (S. cerevisiae)                                                                                                                     |
| 1416687_at   | 433.00   | 0.000244 P | 747.30   | 0.000244 P | 314.30  | 1.62 | 0.000027 | Plod2     | procollagen lysine, 2-oxoglutarate 5-dioxygenase 2                                                                                                       |
| 1417183_at   | 340.00   | 0.124512 A | 695.50   | 0.002930 P | 355.50  | 1.62 | 0.000492 | Dnaja2    | DnaJ (Hsp40) homolog, subfamily A, member 2                                                                                                              |
| 1417225_at   | 537.10   | 0.000732 P | 930.30   | 0.010742 P | 393.20  | 1.62 | 0.000618 | Arl6ip5   | ADP-ribosylation-like factor 6 interacting protein 5                                                                                                     |
| 1417981_at   | 233.90   | 0.023926 P | 585.80   | 0.001221 P | 351.90  | 1.62 | 0.000114 | Insig2    | RIKEN cDNA 2900053111 gene                                                                                                                               |
| 1418626_a_at | 546.80   | 0.000244 P | 940.10   | 0.000732 P | 393.30  | 1.62 | 0.001077 | Clu       | clusterin                                                                                                                                                |
| 1418669_at   | 419.50   | 0.008057 P | 872.50   | 0.000244 P | 453.00  | 1.62 | 0.001336 | Hspg2     | perlecan (heparan sulfate proteoglycan 2)                                                                                                                |
| 1419445_s_at | 655.90   | 0.00415 P  | 889.50   | 0.000244 P | 233.60  | 1.62 | 0.002032 | Sap18     | Sin3-associated polypeptide 18                                                                                                                           |
| 1419484_a_at | 1783.00  | 0.001221 P | 2592.90  | 0.000244 P | 809.90  | 1.62 | 0.000088 | Gbas      | glioblastoma amplified sequence                                                                                                                          |
| 1419573_a_at | 6951.80  | 0.000244 P | 10762.00 | 0.000244 P | 3810.20 | 1.62 | 0.000060 | Lgals1    | lectin, galactose binding, soluble 1                                                                                                                     |
| 1419637_s_at | 230.70   | 0.149658 A | 570.10   | 0.010742 P | 339.40  | 1.62 | 0.003041 | Rik       | RIKEN cDNA 4833420G17 gene                                                                                                                               |
| 1422185_a_at | 613.20   | 0.000244 P | 1396.40  | 0.000244 P | 783.20  | 1.62 | 0.000052 | Cyb5r3    | diaphorase 1 (NADH)                                                                                                                                      |
| 1422438_at   | 601.70   | 0.000732 P | 998.00   | 0.000244 P | 396.30  | 1.62 | 0.000865 | Ephx1     | epoxide hydrolase 1, microsomal                                                                                                                          |
| 1422479_at   | 269.80   | 0.171387 A | 511.20   | 0.000244 P | 241.40  | 1.62 | 0.001201 | Acss2     | acetyl-Coenzyme A synthetase 2 (ADP forming)                                                                                                             |
| 1422879_at   | 728.60   | 0.000732 P | 1157.30  | 0.000244 P | 428.70  | 1.62 | 0.000130 | Sypl      | synaptophysin-like protein                                                                                                                               |
| 1423130_a_at | 2989.70  | 0.000244 P | 4899.60  | 0.000244 P | 1909.90 | 1.62 | 0.000167 | Sfrs5     | splicing factor, arginine/serine-rich 5 (SRp40, HRS)                                                                                                     |
| 1423215_at   | 223.20   | 0.171387 A | 514.40   | 0.001953 P | 291.20  | 1.62 | 0.001486 | Spcs2     | RIKEN cDNA 573040615 gene                                                                                                                                |
| 1423423_at   | 1198.00  | 0.000244 P | 2001.30  | 0.000244 P | 803.30  | 1.62 | 0.000130 | Pdia3     | glucose regulated protein                                                                                                                                |
| 1423451_at   | 1218.30  | 0.000244 P | 1787.60  | 0.000244 P | 569.30  | 1.62 | 0.003355 | Pgrmc1    | progesterone receptor membrane component 1                                                                                                               |
| 1423727_at   | 450.20   | 0.080566 A | 1015.30  | 0.002930 P | 565.10  | 1.62 | 0.003699 | Cnih      | cornichon homolog (Drosophila)                                                                                                                           |
| 1423734_at   | 1503.30  | 0.000732 P | 2513.90  | 0.000244 P | 1010.60 | 1.62 | 0.000035 | Rac1      | RAS-related C3 botulinum substrate 1                                                                                                                     |
| 1423987_at   | 291.10   | 0.080566 A | 567.10   | 0.014160 P | 276.00  | 1.62 | 0.000147 | Cdc26     | RIKEN cDNA 2010012C09 gene                                                                                                                               |
| 1424801_at   | 444.90   | 0.030273 P | 858.00   | 0.014160 P | 413.10  | 1.62 | 0.001832 | Enah      | enabled homolog (Drosophila)                                                                                                                             |
| 1425028_a_at | 2520.70  | 0.000244 P | 4030.50  | 0.000244 P | 1509.80 | 1.62 | 0.000307 | Tpm2      | tropomyosin 2, beta                                                                                                                                      |
| 1425505_at   | 704.10   | 0.00415 P  | 1032.30  | 0.000732 P | 328.20  | 1.62 | 0.000027 | Myk       | myosin, light polypeptide kinase                                                                                                                         |
| 1425810_a_at | 1007.10  | 0.001953 P | 1991.70  | 0.000732 P | 984.60  | 1.62 | 0.000068 | Csrp1     | cysteine rich protein 1                                                                                                                                  |
| 1425811_a_at | 1393.90  | 0.000732 P | 2729.70  | 0.000732 P | 1335.80 | 1.62 | 0.000052 | Csrp1     | cysteine rich protein 1                                                                                                                                  |
| 1426434_at   | 256.20   | 0.023926 P | 410.00   | 0.008057 P | 153.80  | 1.62 | 0.002250 | Tmem43    | RIKEN cDNA 1200015A22 gene                                                                                                                               |
| 1426480_at   | 734.30   | 0.000732 P | 1539.20  | 0.000244 P | 804.90  | 1.62 | 0.000147 | Sbds      | RIKEN cDNA 4733401P19 gene                                                                                                                               |
| 1426677_at   | 2537.10  | 0.000244 P | 3594.60  | 0.000244 P | 1057.50 | 1.62 | 0.001832 | Flna      | filamin-like protein                                                                                                                                     |
| 1426776_at   | 334.40   | 0.149658 A | 561.30   | 0.008057 P | 226.90  | 1.62 | 0.004073 | Wasl      | RIKEN cDNA 2900021112 gene                                                                                                                               |
| 1427201_at   | 999.90   | 0.001953 P | 1602.20  | 0.000732 P | 602.30  | 1.62 | 0.003041 | Mustn1    | RIKEN cDNA 1110028G01 gene                                                                                                                               |
| 1427250_at   | 1227.70  | 0.000244 P | 2567.60  | 0.000244 P | 1339.90 | 1.62 | 0.000088 | Atp2a2    | ATPase, Ca++ transporting, cardiac muscle, slow twitch 2                                                                                                 |
| 1428406_s_at | 965.80   | 0.001953 P | 1347.00  | 0.000732 P | 381.20  | 1.62 | 0.000088 | Hcfc1r1   | tumor necrosis factor receptor superfamily, member 12a                                                                                                   |
| 1428871_at   | 410.60   | 0.00415 P  | 643.10   | 0.001221 P | 232.50  | 1.62 | 0.001832 | Rik       | Mus musculus adult male medulla oblongata cDNA, RIKEN full-length enriched library, clone:6330442G23 product:hypothetical protein, full insert sequence. |
| 1430307_a_at | 876.90   | 0.000244 P | 1150.50  | 0.000244 P | 273.60  | 1.62 | 0.000865 | LOC677317 | malic enzyme, supernatant                                                                                                                                |
| 1433442_at   | 133.40   | 0.171387 A | 311.60   | 0.013184 P | 178.20  | 1.62 | 0.002490 | Kihl9     | RIKEN cDNA C530500C22 gene                                                                                                                               |
| 1433913_at   | 157.90   | 0.303711 A | 345.10   | 0.005859 P | 187.20  | 1.62 | 0.002250 | C80913    | RPB5-mediated protein                                                                                                                                    |
| 1434540_a_at | 346.00   | 0.00293 P  | 619.90   | 0.000244 P | 273.90  | 1.62 | 0.000346 | Cita      | clathrin, light polypeptide (Lca)                                                                                                                        |
| 1435137_s_at | 3968.40  | 0.000244 P | 9838.80  | 0.000732 P | 5870.40 | 1.62 | 0.000040 | Rik       | 1200015M12                                                                                                                                               |
| 1436363_a_at | 892.30   | 0.005859 P | 1378.30  | 0.000244 P | 486.00  | 1.62 | 0.000078 | Nfix      | nuclear factor I/X                                                                                                                                       |
| 1436902_x_at | 1080.00  | 0.000244 P | 1879.70  | 0.000244 P | 799.70  | 1.62 | 0.000552 | Tmsb10    | thymosin, beta 10                                                                                                                                        |
| 1436995_a_at | 10918.30 | 0.000244 P | 15708.50 | 0.000244 P | 4790.20 | 1.62 | 0.000618 | Rpl26     | ribosomal protein L26                                                                                                                                    |
| 1437687_x_at | 2043.60  | 0.000244 P | 2626.70  | 0.000244 P | 583.10  | 1.62 | 0.001486 | Fkbp9     | FK506 binding protein 9                                                                                                                                  |
| 1437902_s_at | 831.90   | 0.005859 P | 1873.90  | 0.001221 P | 1042.00 | 1.62 | 0.000068 | Rarres2   | RIKEN cDNA 0610007L05 gene                                                                                                                               |
| 1438680_at   | 210.30   | 0.129639 A | 377.30   | 0.014160 P | 167.00  | 1.62 | 0.000966 | Auts2     | RIKEN cDNA 2700063G02 gene                                                                                                                               |
| 1448241_at   | 1911.30  | 0.000732 P | 2902.20  | 0.000732 P | 990.90  | 1.62 | 0.000438 | Gm2a      | GM2 ganglioside activator protein                                                                                                                        |
| 1448425_at   | 906.70   | 0.001221 P | 1608.10  | 0.000732 P | 701.40  | 1.62 | 0.000346 | Eif3s10   | eukaryotic translation initiation factor 3                                                                                                               |
| 1448545_at   | 273.90   | 0.046143 P | 612.40   | 0.005859 P | 338.50  | 1.62 | 0.001651 | Sdc2      | syndecan 2                                                                                                                                               |
| 1448605_at   | 207.10   | 0.067627 A | 356.70   | 0.002930 P | 149.60  | 1.62 | 0.000692 | Rhoc      | ras homolog gene family, member C                                                                                                                        |
| 1448823_at   | 567.60   | 0.005859 P | 1024.10  | 0.000244 P | 456.50  | 1.62 | 0.000020 | Cxcl12    | chemokine (C-X-C motif) ligand 12                                                                                                                        |
| 1448962_at   | 5820.80  | 0.000732 P | 10177.60 | 0.001221 P | 4356.80 | 1.62 | 0.000307 | Myh11     | myosin heavy chain 11, smooth muscle                                                                                                                     |
| 1450641_at   | 17387.20 | 0.000244 P | 24765.40 | 0.000244 P | 7378.20 | 1.62 | 0.000020 | Vim       | vimentin                                                                                                                                                 |
| 1450841_at   | 396.40   | 0.00293 P  | 734.40   | 0.001953 P | 338.00  | 1.62 | 0.001832 | Stt3a     | integral membrane protein 1                                                                                                                              |
| 1450878_at   | 386.30   | 0.018555 P | 560.40   | 0.000244 P | 174.10  | 1.62 | 0.000241 | Sri       | RIKEN cDNA 2210417006 gene                                                                                                                               |
| 1450894_a_at | 630.90   | 0.001953 P | 1201.40  | 0.000244 P | 570.50  | 1.62 | 0.003041 | Ap2m1     | adaptor protein complex AP-2, mu1                                                                                                                        |
| 1450957_a_at | 1916.00  | 0.000244 P | 3587.00  | 0.000244 P | 1671.00 | 1.62 | 0.000389 | Sqstm1    | sequestosome 1                                                                                                                                           |
| 1451075_s_at | 2554.00  | 0.000732 P | 3363.70  | 0.000244 P | 809.70  | 1.62 | 0.000046 | Ctdsp2    | DNA segment, Chr 10, ERATO Doi 73, expressed                                                                                                             |
| 1451126_at   | 613.00   | 0.000244 P | 1387.70  | 0.000732 P | 774.70  | 1.62 | 0.000492 | Maf1      | RIKEN cDNA 1110068E11 gene                                                                                                                               |
| 1451132_at   | 1737.80  | 0.000732 P | 2902.60  | 0.000244 P | 1164.80 | 1.62 | 0.002032 | Pbxip1    | RIKEN cDNA 4732463H20 gene                                                                                                                               |
| 1451159_at   | 1266.10  | 0.005859 P | 1980.10  | 0.001953 P | 714.00  | 1.62 | 0.000147 | Arhgef12  |                                                                                                                                                          |
| 1451310_a_at | 1454.50  | 0.000244 P | 2387.20  | 0.000244 P | 932.70  | 1.62 | 0.000078 | Ctsl      | cathepsin L                                                                                                                                              |
| 1452439_s_at | 567.70   | 0.00415 P  | 1049.60  | 0.001953 P | 481.90  | 1.62 | 0.000020 | Sfrs2     | splicing factor, arginine/serine-rich 2 (SC-35)                                                                                                          |
| 1452469_a_at | 957.60   | 0.001221 P | 1338.40  | 0.000244 P | 380.80  | 1.62 | 0.000241 | Smtln     | smoothenin                                                                                                                                               |
| 1454849_x_at | 5126.00  | 0.000244 P | 6836.50  | 0.000244 P | 1710.50 | 1.62 | 0.001832 | Clu       | clusterin                                                                                                                                                |
| 1455439_a_at | 8047.20  | 0.000244 P | 10603.60 | 0.000244 P | 2556.40 | 1.62 | 0.000040 | Lgals1    | lectin, galactose binding, soluble 1                                                                                                                     |
| 1455897_x_at | 864.10   | 0.000244 P | 1374.80  | 0.000244 P | 510.70  | 1.62 | 0.001201 | Hmgn1     | high mobility group nucleosomal binding domain 1                                                                                                         |
| 1456312_x_at | 3079.90  | 0.010742 P | 7205.30  | 0.001221 P | 4125.40 | 1.62 | 0.000040 | Gsn       | gelsolin                                                                                                                                                 |
| 1460694_s_at | 293.20   | 0.129639 A | 822.70   | 0.000732 P | 529.50  | 1.62 | 0.000023 | Svil      | supervillin                                                                                                                                              |
| 145775_at    | 763.10   | 0.000244 P | 1710.80  | 0.000244 P | 947.70  | 1.52 | 0.000088 | Rbbp7     | retinoblastoma binding protein 7                                                                                                                         |
| 145839_a_at  | 1115.80  | 0.005859 P | 1716.30  | 0.004150 P | 600.50  | 1.52 | 0.000030 | Npm1      | nucleophosmin 1                                                                                                                                          |
| 145870_at    | 1299.70  | 0.000732 P | 1827.70  | 0.000244 P | 528.00  | 1.52 | 0.001201 | Calu      | calumenin                                                                                                                                                |
| 145887_at    | 997.90   | 0.00293 P  | 1384.70  | 0.000244 P | 386.80  | 1.52 | 0.004481 | Tfg       | Trk-fused gene                                                                                                                                           |
| 1461653_at   | 1005.50  | 0.000244 P | 1507.70  | 0.000244 P | 502.20  | 1.52 | 0.000130 | Srp54     | signal recognition particle 54 kDa                                                                                                                       |
| 1461693_at   | 614.70   | 0.000732 P | 955.10   | 0.000244 P | 340.40  | 1.52 | 0.000492 | Emg1      | gene rich cluster, C2f gene                                                                                                                              |
| 1461726_s_at | 562.10   | 0.008057 P | 709.10   | 0.000244 P | 147.00  | 1.52 | 0.000167 | Ube2s     | RIKEN cDNA 6720465F12 gene                                                                                                                               |
| 1417063_at   | 178.80   | 0.19458 A  | 345.30   | 0.008057 P | 166.50  | 1.52 | 0.001651 | C1qb      | complement component 1, q subcomponent, beta polypeptide                                                                                                 |
| 1417219_s_at | 276.40   | 0.01416 P  | 483.10   | 0.002930 P | 206.70  | 1.52 | 0.001336 | Tmsb10    | thymosin, beta 10                                                                                                                                        |
| 1417598_a_at | 482.80   | 0.010742 P | 887.60   | 0.004150 P | 404.80  | 1.52 | 0.000088 | Fxr1h     | fragile X mental retardation gene 1, autosomal homolog                                                                                                   |
| 1417818_at   | 978.10   | 0.000244 P | 1500.50  | 0.000732 P | 522.40  | 1.52 | 0.002490 | Wwtr1     | Mus musculus, clone IMAGE:5011849, mRNA                                                                                                                  |
| 1417947_at   | 776.00   | 0.000244 P | 1240.20  | 0.000244 P | 464.20  | 1.52 | 0.002032 | Pcna      | proliferating cell nuclear antigen                                                                                                                       |
| 1417951_at   | 253.20   | 0.046143 P | 417.20   | 0.000732 P | 164.00  | 1.52 | 0.004073 | Eno3      | enolase 3, beta muscle                                                                                                                                   |

|              |          |          |   |          |          |   |          |       |          |                                                                                                                                                               |                                                                                                                                       |
|--------------|----------|----------|---|----------|----------|---|----------|-------|----------|---------------------------------------------------------------------------------------------------------------------------------------------------------------|---------------------------------------------------------------------------------------------------------------------------------------|
| 1418067_at   | 834.00   | 0.001221 | P | 1573.20  | 0.000244 | P | 739.20   | 1.52  | 0.002250 | Cf12                                                                                                                                                          | cofilin 2, muscle                                                                                                                     |
| 1418892_at   | 1323.80  | 0.000244 | P | 1926.60  | 0.000244 | P | 602.80   | 1.52  | 0.000214 | Rhoj                                                                                                                                                          | ras homolog gene family, member J                                                                                                     |
| 1418926_at   | 876.50   | 0.001953 | P | 1392.10  | 0.000244 | P | 515.60   | 1.52  | 0.000552 | Zeb1                                                                                                                                                          | zinc finger homeobox 1a                                                                                                               |
| 1420621_a_at | 1472.10  | 0.000244 | P | 2123.40  | 0.000244 | P | 651.30   | 1.52  | 0.000214 | App                                                                                                                                                           | amyloid beta (A4) precursor protein                                                                                                   |
| 1420745_a_at | 353.00   | 0.115722 | A | 502.40   | 0.002930 | P | 149.40   | 1.52  | 0.001336 | Ccndbp1                                                                                                                                                       | maternal inhibition of differentiation                                                                                                |
| 1421254_a_at | 637.60   | 0.00415  | P | 1020.10  | 0.000732 | P | 382.50   | 1.52  | 0.001336 | Sgcg                                                                                                                                                          | sarcoglycan, gamma (35kD dystrophin-associated glycoprotein)                                                                          |
| 1422186_s_at | 668.20   | 0.008057 | P | 1040.80  | 0.002930 | P | 372.60   | 1.52  | 0.000966 | Cyb5r3                                                                                                                                                        | diaphorase 1 (NADH)                                                                                                                   |
| 1422465_a_at | 244.50   | 0.056152 | M | 453.10   | 0.030273 | P | 208.60   | 1.52  | 0.001651 | Nxn                                                                                                                                                           | nucleoredoxin                                                                                                                         |
| 1422712_a_at | 644.50   | 0.067627 | A | 1025.00  | 0.008057 | P | 380.50   | 1.52  | 0.000552 | Ube2i                                                                                                                                                         | ubiquitin-conjugating enzyme E2I                                                                                                      |
| 1423058_at   | 698.00   | 0.000732 | P | 945.20   | 0.000244 | P | 247.20   | 1.52  | 0.000389 | Capza2                                                                                                                                                        | capping protein (actin filament) muscle Z-line, alpha 2                                                                               |
| 1423326_at   | 346.90   | 0.095215 | A | 549.10   | 0.000732 | P | 202.20   | 1.52  | 0.001077 | Entpd1                                                                                                                                                        | ectonucleoside triphosphate diphosphohydrolase 1                                                                                      |
| 1424176_a_at | 224.60   | 0.046143 | P | 376.40   | 0.000732 | P | 151.80   | 1.52  | 0.002490 | Anxa4                                                                                                                                                         | annexin A4                                                                                                                            |
| 1424185_a_at | 2311.50  | 0.000244 | P | 3786.50  | 0.000732 | P | 1475.00  | 1.52  | 0.000088 | A730098P11<br>Rik ///<br>EG627352 ///<br>LOC433955<br>///<br>LOC626309<br>/// Morf411                                                                         | testis expressed gene 189                                                                                                             |
| 1424318_at   | 569.30   | 0.001953 | P | 1005.10  | 0.000244 | P | 435.80   | 1.52  | 0.004481 | Rik                                                                                                                                                           | RIKEN cDNA 1110067D22 gene                                                                                                            |
| 1424770_at   | 1124.90  | 0.000732 | P | 2505.10  | 0.000732 | P | 1380.20  | 1.52  | 0.003699 | Cald1                                                                                                                                                         | Mus musculus 0 day neonate head cDNA, RIKEN full-length enriched library, clone:4833423D12 product:unknown EST, full insert sequence. |
| 1425550_a_at | 1057.30  | 0.000244 | P | 1937.70  | 0.000244 | P | 880.40   | 1.52  | 0.004073 | Prkar1a                                                                                                                                                       | protein kinase, cAMP dependent regulatory, type I, alpha                                                                              |
| 1425665_a_at | 456.50   | 0.030273 | P | 777.20   | 0.008057 | P | 320.70   | 1.52  | 0.001832 | LOC665155<br>/// Srp54                                                                                                                                        | signal recognition particle 54 kDa                                                                                                    |
| 1425993_a_at | 362.90   | 0.008057 | P | 742.00   | 0.001953 | P | 379.10   | 1.52  | 0.000774 | Hsp110                                                                                                                                                        | heat shock protein                                                                                                                    |
| 1426162_a_at | 3375.10  | 0.000244 | P | 4538.00  | 0.000244 | P | 1162.90  | 1.52  | 0.000552 | Rpl7                                                                                                                                                          | ribosomal protein L7                                                                                                                  |
| 1426163_x_at | 607.60   | 0.030273 | P | 822.60   | 0.010742 | P | 215.00   | 1.52  | 0.000552 | Rpl7                                                                                                                                                          | ribosomal protein L7                                                                                                                  |
| 1426378_at   | 655.30   | 0.000732 | P | 1132.40  | 0.000244 | P | 477.10   | 1.52  | 0.001336 | Eif4b                                                                                                                                                         | RIKEN cDNA 2310046H11 gene                                                                                                            |
| 1426812_a_at | 349.50   | 0.095215 | A | 778.90   | 0.000732 | P | 429.40   | 1.52  | 0.000438 | Rik                                                                                                                                                           | RIKEN cDNA 9130404D14 gene                                                                                                            |
| 1427074_at   | 239.70   | 0.010742 | P | 421.00   | 0.001221 | P | 181.30   | 1.52  | 0.000552 | Pcmdt2                                                                                                                                                        | RIKEN cDNA 5330414D10 gene                                                                                                            |
| 1427773_a_at | 1080.30  | 0.000244 | P | 2310.10  | 0.001953 | P | 1229.80  | 1.52  | 0.000552 | Rabac1                                                                                                                                                        | Rab acceptor 1 (prenylated)                                                                                                           |
| 1427918_a_at | 1981.40  | 0.000244 | P | 3018.40  | 0.000732 | P | 1037.00  | 1.52  | 0.000438 | Rhoq                                                                                                                                                          | ras-like protein                                                                                                                      |
| 1428112_at   | 362.40   | 0.037598 | P | 793.40   | 0.001221 | P | 431.00   | 1.52  | 0.002490 | Armet                                                                                                                                                         | arginine-rich, mutated in early stage tumors                                                                                          |
| 1433855_at   | 84.60    | 0.432373 | A | 244.90   | 0.010742 | P | 160.30   | 1.52  | 0.003699 | Abat                                                                                                                                                          | hypothetical protein, I54                                                                                                             |
| 1434396_a_at | 7290.20  | 0.001953 | P | 9964.80  | 0.000732 | P | 2674.60  | 1.52  | 0.000273 | EG433297 ///<br>EG667952 ///<br>LOC671953<br>/// Myf6                                                                                                         | myosin light chain, alkali, nonmuscle                                                                                                 |
| 1435643_x_at | 14712.40 | 0.000244 | P | 17137.40 | 0.000244 | P | 2425.00  | 1.52  | 0.001201 | Gm1821 ///<br>Ubb                                                                                                                                             | ubiquitin B                                                                                                                           |
| 1436714_at   | 1800.30  | 0.000244 | P | 3561.80  | 0.000732 | P | 1761.50  | 1.52  | 0.000774 | Lpp                                                                                                                                                           | RIKEN cDNA B130055L10 gene                                                                                                            |
| 1439463_x_at | 986.80   | 0.000244 | P | 1167.60  | 0.000244 | P | 180.80   | 1.52  | 0.003699 | EG434174 ///<br>EG545555 ///<br>EG666836 ///<br>Hmgb1 ///<br>LOC623634<br>///<br>LOC625467<br>///<br>LOC637733<br>///<br>LOC669546<br>///<br>LOC669692<br>/// | high mobility group box 1                                                                                                             |
| 1448343_a_at | 352.70   | 0.023926 | P | 617.30   | 0.000732 | P | 264.60   | 1.52  | 0.002250 | Nbr1                                                                                                                                                          | next to the Brca1                                                                                                                     |
| 1448402_at   | 643.50   | 0.010742 | P | 1217.40  | 0.001953 | P | 573.90   | 1.52  | 0.000035 | Tln1                                                                                                                                                          | talin                                                                                                                                 |
| 1448788_at   | 415.40   | 0.030273 | P | 671.90   | 0.000244 | P | 256.50   | 1.52  | 0.000492 | Cd200                                                                                                                                                         | antigen identified by monoclonal antibody MRC OX-2                                                                                    |
| 1449643_s_at | 1824.10  | 0.008057 | P | 2155.30  | 0.000244 | P | 331.20   | 1.52  | 0.000492 | Btf3                                                                                                                                                          | similar to Transcription factor BTF3 (RNA polymerase B transcription factor 3)                                                        |
| 1449815_a_at | 471.30   | 0.001953 | P | 590.00   | 0.000244 | P | 118.70   | 1.52  | 0.001651 | Ssbp2                                                                                                                                                         | single-stranded DNA binding protein 2                                                                                                 |
| 1449942_a_at | 1349.60  | 0.000244 | P | 2766.70  | 0.000244 | P | 1417.10  | 1.52  | 0.000068 | Ilk                                                                                                                                                           | integrin linked kinase                                                                                                                |
| 1450007_at   | 599.20   | 0.005859 | P | 1114.00  | 0.000244 | P | 514.80   | 1.52  | 0.000214 | 1500003O03<br>Rik                                                                                                                                             | calcium binding protein P22                                                                                                           |
| 1450522_a_at | 216.80   | 0.129639 | A | 373.60   | 0.005859 | P | 156.80   | 1.52  | 0.004073 | H1f0                                                                                                                                                          | H1 histone family, member 0                                                                                                           |
| 1451125_at   | 271.50   | 0.056152 | M | 443.60   | 0.010742 | P | 172.10   | 1.52  | 0.002250 | Paip2b                                                                                                                                                        | hypothetical protein MGC27648                                                                                                         |
| 1451196_at   | 480.00   | 0.00293  | P | 1052.40  | 0.000732 | P | 572.40   | 1.52  | 0.000130 | Ypel5                                                                                                                                                         | RIKEN cDNA 2310076K21 gene                                                                                                            |
| 1451827_a_at | 356.20   | 0.01416  | P | 457.70   | 0.000244 | P | 101.50   | 1.52  | 0.003355 | Nox4                                                                                                                                                          | NADPH oxidase 4                                                                                                                       |
| 1452683_at   | 1227.00  | 0.001953 | P | 1758.90  | 0.001221 | P | 531.90   | 1.52  | 0.000618 | Dnajc8 ///<br>LOC669266                                                                                                                                       | DnaJ (Hsp40) homolog, subfamily C, member 8                                                                                           |
| 1452843_at   | 1413.70  | 0.001221 | P | 1723.70  | 0.000244 | P | 310.00   | 1.52  | 0.004481 | Il6st                                                                                                                                                         | RIKEN cDNA 5133400A03 gene                                                                                                            |
| 1453723_x_at | 8101.50  | 0.000244 | P | 13738.60 | 0.000244 | P | 5637.10  | 1.52  | 0.000060 | Gm1821 ///<br>Ubb                                                                                                                                             | ubiquitin B                                                                                                                           |
| 1454758_a_at | 1315.00  | 0.001221 | P | 2236.00  | 0.001221 | P | 921.00   | 1.52  | 0.000552 | Tsc22d1                                                                                                                                                       | transforming growth factor beta 1 induced transcript 4                                                                                |
| 1454811_a_at | 968.10   | 0.001953 | P | 1586.10  | 0.001221 | P | 618.00   | 1.52  | 0.001486 | Serinc1                                                                                                                                                       | tumor differentially expressed 1, like expressed sequence AW538196                                                                    |
| 1455912_x_at | 192.40   | 0.149658 | A | 435.20   | 0.002930 | P | 242.80   | 1.52  | 0.001486 | Unc45a                                                                                                                                                        | 2310002J21                                                                                                                            |
| 1456393_at   | 2396.30  | 0.000244 | P | 3562.30  | 0.000244 | P | 1166.00  | 1.52  | 0.000167 | Rik                                                                                                                                                           | programmed cell death 4                                                                                                               |
| 1456567_x_at | 713.50   | 0.00293  | P | 1653.90  | 0.001221 | P | 940.40   | 1.52  | 0.000389 | Gm                                                                                                                                                            | granulin                                                                                                                              |
| 1460367_at   | 1100.50  | 0.000244 | P | 2270.00  | 0.000244 | P | 1169.50  | 1.52  | 0.001651 | Hbp1                                                                                                                                                          | RIKEN cDNA 1700058O05 gene                                                                                                            |
| 1415984_at   | 12513.40 | 0.000244 | P | 10061.80 | 0.000244 | P | -2451.60 | -1.52 | 0.000389 | Acadm                                                                                                                                                         | acetyl-Coenzyme A dehydrogenase, medium chain                                                                                         |
| 1416140_a_at | 496.90   | 0.00293  | P | 294.40   | 0.080566 | A | -202.50  | -1.52 | 0.000492 | Dhx30                                                                                                                                                         | RIKEN cDNA 2810477H02 gene                                                                                                            |
| 1416203_at   | 5129.60  | 0.000244 | P | 3938.20  | 0.000244 | P | -1191.40 | -1.52 | 0.003355 | Aqp1                                                                                                                                                          | aquaporin 1                                                                                                                           |
| 1416303_at   | 1240.10  | 0.000244 | P | 962.40   | 0.001953 | P | -277.70  | -1.52 | 0.000089 | Litaf                                                                                                                                                         | LPS-induced TN factor                                                                                                                 |
| 1416494_at   | 5790.20  | 0.001953 | P | 3465.90  | 0.000732 | P | -2324.30 | -1.52 | 0.001336 | Ndufs5                                                                                                                                                        | NADH dehydrogenase (ubiquinone) Fe-S protein 5                                                                                        |
| 1416609_at   | 1562.70  | 0.001221 | P | 984.40   | 0.000244 | P | -578.30  | -1.52 | 0.004073 | BC004004                                                                                                                                                      | cDNA sequence BC004004                                                                                                                |
| 1416647_at   | 1178.60  | 0.000244 | P | 865.40   | 0.001221 | P | -313.20  | -1.52 | 0.003699 | Bckdha                                                                                                                                                        | branched chain ketoacid dehydrogenase E1, alpha polypeptide                                                                           |
| 1416921_x_at | 16818.50 | 0.000244 | P | 11072.90 | 0.000244 | P | -5745.60 | -1.52 | 0.000307 | Aldoa                                                                                                                                                         | aldolase 1, A isoform                                                                                                                 |

|              |          |          |   |          |          |   |           |       |          |                                        |                                                                                   |
|--------------|----------|----------|---|----------|----------|---|-----------|-------|----------|----------------------------------------|-----------------------------------------------------------------------------------|
| 1417417_a_at | 30763.40 | 0.000244 | P | 21613.50 | 0.000244 | P | -9149.90  | -1.52 | 0.000966 | Cox6a1                                 | cytochrome c oxidase, subunit VI a, polypeptide 1                                 |
| 1417870_x_at | 3762.20  | 0.000244 | P | 2246.70  | 0.000732 | P | -1515.50  | -1.52 | 0.000101 | Ctsz                                   | cathepsin Z                                                                       |
| 1417972_s_at | 934.50   | 0.000244 | P | 446.20   | 0.000244 | P | -488.30   | -1.52 | 0.001651 | Pop5                                   | RIKEN cDNA 1500019J17 gene                                                        |
| 1418005_at   | 22551.30 | 0.000244 | P | 14122.10 | 0.000244 | P | -8429.20  | -1.52 | 0.000214 | Sdhd                                   | RIKEN cDNA 0710008H11 gene                                                        |
| 1418183_a_at | 472.90   | 0.001221 | P | 260.90   | 0.008057 | P | -212.00   | -1.52 | 0.004481 | Pscd1                                  | pleckstrin homology, Sec7 and coiled/coiled domains 1                             |
| 1418444_a_at | 1866.00  | 0.000244 | P | 1415.30  | 0.002930 | P | -450.70   | -1.52 | 0.000214 | Mir16                                  | membrane interacting protein of RGS16                                             |
| 1418886_s_at | 7438.30  | 0.000244 | P | 4693.30  | 0.000244 | P | -2745.00  | -1.52 | 0.000241 | ldh3b                                  | isocitrate dehydrogenase 3 (NAD+) beta                                            |
| 1419367_at   | 7467.10  | 0.000244 | P | 4762.00  | 0.000244 | P | -2705.10  | -1.52 | 0.003699 | Decr1                                  | 2,4-dienoyl CoA reductase 1, mitochondrial                                        |
| 1419687_at   | 895.80   | 0.000244 | P | 441.90   | 0.010742 | P | -453.90   | -1.52 | 0.000046 | Rik                                    | expressed sequence AI604841                                                       |
| 1419737_a_at | 10142.60 | 0.000244 | P | 6282.00  | 0.000732 | P | -3860.60  | -1.52 | 0.000389 | Ldha                                   | lactate dehydrogenase 1, A chain                                                  |
| 1420997_a_at | 6224.80  | 0.000244 | P | 4229.10  | 0.000244 | P | -1995.70  | -1.52 | 0.000273 | Gpi1 ///<br>LOC676596<br>Cycc ///      | glucose phosphate isomerase 1                                                     |
| 1422483_a_at | 8048.80  | 0.000244 | P | 5380.20  | 0.000244 | P | -2668.60  | -1.52 | 0.000078 | LOC672195                              | cytochrome c, somatic                                                             |
| 1422577_at   | 2745.00  | 0.000244 | P | 2006.40  | 0.000244 | P | -738.60   | -1.52 | 0.003041 | Cs                                     | citrate synthase                                                                  |
| 1422767_at   | 346.00   | 0.00293  | P | 207.30   | 0.095215 | A | -138.70   | -1.52 | 0.000865 | Bysl                                   | bystin-like                                                                       |
| 1423242_at   | 1556.10  | 0.000244 | P | 1114.90  | 0.002930 | P | -441.20   | -1.52 | 0.000307 | Mrops36                                | RIKEN cDNA 1110018B13 gene                                                        |
| 1423449_a_at | 1588.40  | 0.001953 | P | 1056.20  | 0.000732 | P | -532.20   | -1.52 | 0.000774 | Actn4                                  | actinin alpha 4                                                                   |
| 1423651_at   | 2443.70  | 0.000244 | P | 1448.90  | 0.000244 | P | -994.80   | -1.52 | 0.000114 | Isca1                                  | RIKEN cDNA 1810010A06 gene                                                        |
| 1423907_a_at | 4701.30  | 0.000244 | P | 3126.10  | 0.000244 | P | -1575.20  | -1.52 | 0.000307 | Ndufs8                                 | hypothetical protein MGC37950                                                     |
| 1424364_a_at | 11633.90 | 0.000244 | P | 9009.40  | 0.000244 | P | -2624.50  | -1.52 | 0.001077 | Rik                                    | RIKEN cDNA 1110020P15 gene                                                        |
| 1424638_at   | 1616.50  | 0.000244 | P | 1044.40  | 0.000244 | P | -572.10   | -1.52 | 0.000618 | Cdkn1a                                 | cyclin-dependent kinase inhibitor 1A (P21)                                        |
| 1424828_a_at | 4430.10  | 0.000244 | P | 2675.50  | 0.000244 | P | -1754.60  | -1.52 | 0.000346 | Fh1                                    | fumarate hydratase 1                                                              |
| 1425559_a_at | 2016.10  | 0.000244 | P | 894.50   | 0.000244 | P | -1121.60  | -1.52 | 0.000068 | Acsm3                                  | SA rat hypertension-associated homolog                                            |
| 1425826_a_at | 2199.60  | 0.000244 | P | 1315.80  | 0.000732 | P | -883.80   | -1.52 | 0.000089 | Sorbs1                                 | sorbin and SH3 domain containing 1                                                |
| 1425895_a_at | 2443.10  | 0.000244 | P | 1939.60  | 0.000732 | P | -503.50   | -1.52 | 0.000865 | Id1                                    | inhibitor of DNA binding 1                                                        |
| 1426088_at   | 38267.00 | 0.000732 | P | 39676.40 | 0.001221 | P | 1409.40   | -1.52 | 0.002490 | ---                                    | ---                                                                               |
| 1426435_at   | 1054.30  | 0.005859 | P | 609.20   | 0.004150 | P | -445.10   | -1.52 | 0.003699 | Tmem135                                | RIKEN cDNA 2810439K08 gene                                                        |
| 1426735_at   | 363.90   | 0.008057 | P | 188.60   | 0.194580 | A | -175.30   | -1.52 | 0.003699 | lars2                                  | RIKEN cDNA 2010002H18 gene                                                        |
| 1426742_at   | 4227.40  | 0.000244 | P | 2653.00  | 0.000244 | P | -1574.40  | -1.52 | 0.000046 | Atp5f1<br>2610507B11                   | ATP synthase, H+ transporting, mitochondrial F0 complex, subunit b, isoform 1     |
| 1426820_at   | 1723.50  | 0.000244 | P | 1212.10  | 0.002930 | P | -511.40   | -1.52 | 0.000189 | Rik                                    | RIKEN cDNA 2610507B11 gene                                                        |
| 1426830_a_at | 5935.80  | 0.000244 | P | 4126.50  | 0.000244 | P | -1809.30  | -1.52 | 0.000307 | Ahcy1                                  | RIKEN cDNA 1110034F20 gene                                                        |
| 1428161_a_at | 8704.70  | 0.000244 | P | 5720.10  | 0.000244 | P | -2984.60  | -1.52 | 0.000023 | Chchd2                                 | ethanol induced 6                                                                 |
| 1428526_at   | 1122.60  | 0.000244 | P | 892.20   | 0.005859 | P | -230.40   | -1.52 | 0.001336 | Lsmad1                                 | RIKEN cDNA 1500034E06 gene                                                        |
| 1428631_a_at | 5692.40  | 0.000244 | P | 3787.80  | 0.000732 | P | -1904.60  | -1.52 | 0.003355 | Uqcrc2                                 | RIKEN cDNA 1500004O06 gene                                                        |
| 1428843_at   | 2456.40  | 0.000244 | P | 1633.70  | 0.000244 | P | -822.70   | -1.52 | 0.001832 | March5                                 | RIKEN cDNA 1810015H18 gene                                                        |
| 1429159_at   | 737.20   | 0.000732 | P | 541.20   | 0.000732 | P | -196.00   | -1.52 | 0.001651 | Iih5                                   | RIKEN cDNA 4631408O11 gene                                                        |
| 1431012_a_at | 1231.00  | 0.000732 | P | 777.70   | 0.001953 | P | -453.30   | -1.52 | 0.002250 | Peci                                   | peroxisomal delta3, delta2-enoyl-Coenzyme A isomerase                             |
| 1433562_s_at | 2907.40  | 0.000244 | P | 1959.60  | 0.000244 | P | -947.80   | -1.52 | 0.000147 | Atp5f1                                 | ATP synthase, H+ transporting, mitochondrial F0 complex, subunit b, isoform 1     |
| 1434057_at   | 1918.60  | 0.000732 | P | 1210.50  | 0.001221 | P | -708.10   | -1.52 | 0.003699 | Ndufb6                                 | RIKEN cDNA 2010003O02 gene                                                        |
| 1434155_a_at | 665.90   | 0.005859 | P | 461.70   | 0.001953 | P | -204.20   | -1.52 | 0.001486 | ik                                     | RIKEN cDNA 2310061I04 gene                                                        |
| 1434814_x_at | 4913.40  | 0.000244 | P | 3328.60  | 0.000244 | P | -1584.80  | -1.52 | 0.000692 | Gpi1                                   | glucose phosphate isomerase 1                                                     |
| 1435129_at   | 2091.70  | 0.000244 | P | 1240.50  | 0.000244 | P | -851.20   | -1.52 | 0.001651 | Ptp4a2                                 | protein tyrosine phosphatase 4a2                                                  |
| 1435659_a_at | 680.50   | 0.001221 | P | 339.60   | 0.001953 | P | -340.90   | -1.52 | 0.000774 | Tpi1                                   | triosephosphate isomerase                                                         |
| 1436027_at   | 360.90   | 0.037598 | P | 190.20   | 0.037598 | P | -170.70   | -1.52 | 0.004073 | Osblp11                                | expressed sequence AU019795                                                       |
| 1437172_x_at | 2666.50  | 0.001221 | P | 1615.60  | 0.002930 | P | -1050.90  | -1.52 | 0.001077 | Hadhb                                  | RIKEN cDNA 4930479F15 gene                                                        |
| 1437336_x_at | 1320.70  | 0.000244 | P | 965.20   | 0.008057 | P | -355.50   | -1.52 | 0.000966 | Rik                                    | RIKEN cDNA 1110002E23 gene                                                        |
| 1438221_at   | 474.70   | 0.001953 | P | 305.60   | 0.018555 | P | -169.10   | -1.52 | 0.000147 | Rik<br>C130065N10                      | RIKEN cDNA C130065N10 gene                                                        |
| 1439375_x_at | 5179.10  | 0.000732 | P | 3675.30  | 0.001221 | P | -1503.80  | -1.52 | 0.000078 | Aldoa ///<br>EG667483 ///<br>LOC671023 | aldolase 1, A isoform                                                             |
| 1448279_at   | 2068.00  | 0.000244 | P | 1773.40  | 0.000244 | P | -294.60   | -1.52 | 0.004073 | Arcp3                                  | actin related protein 2/3 complex, subunit 3                                      |
| 1448483_a_at | 3156.50  | 0.000244 | P | 1758.20  | 0.000244 | P | -1398.30  | -1.52 | 0.002032 | Ndufb2                                 | RIKEN cDNA 1810011O01 gene                                                        |
| 1448499_a_at | 3700.80  | 0.000244 | P | 2382.60  | 0.000244 | P | -1318.20  | -1.52 | 0.000020 | Ephx2                                  | epoxide hydrolase 2, cytoplasmic                                                  |
| 1448513_a_at | 2403.80  | 0.000244 | P | 1568.40  | 0.000244 | P | -835.40   | -1.52 | 0.000189 | Npc2                                   | Niemann Pick type C2                                                              |
| 1448685_at   | 1961.60  | 0.000244 | P | 1139.50  | 0.000244 | P | -822.10   | -1.52 | 0.003041 | Rik                                    | RIKEN cDNA 2900010M23 gene                                                        |
| 1449106_at   | 12419.40 | 0.000244 | P | 8643.80  | 0.000244 | P | -3775.60  | -1.52 | 0.000167 | Gpx3                                   | glutathione peroxidase 3                                                          |
| 1449131_s_at | 882.00   | 0.000244 | P | 523.80   | 0.001953 | P | -358.20   | -1.52 | 0.000865 | Cd1d1                                  | CD1d1 antigen                                                                     |
| 1449710_s_at | 6577.50  | 0.000244 | P | 5035.70  | 0.000244 | P | -1541.80  | -1.52 | 0.000068 | Atp5a1                                 | ATP synthase, H+ transporting, mitochondrial F1 complex, alpha subunit, isoform 1 |
| 1450968_at   | 8645.80  | 0.000244 | P | 5510.00  | 0.000244 | P | -3135.80  | -1.52 | 0.000027 | Uqcrcs1                                | RIKEN cDNA 4430402G14 gene                                                        |
| 1451084_at   | 4372.60  | 0.000244 | P | 1961.60  | 0.000244 | P | -2411.00  | -1.52 | 0.000089 | Etfhd                                  | RIKEN cDNA 0610010I20 gene                                                        |
| 1454149_a_at | 727.30   | 0.000732 | P | 401.00   | 0.018555 | P | -326.30   | -1.52 | 0.002032 | Ccnl2                                  | Paneth cell enhanced expression                                                   |
| 1455821_x_at | 6960.50  | 0.000244 | P | 3987.70  | 0.000244 | P | -2972.80  | -1.52 | 0.000046 | C1qbp                                  | complement component 1, q subcomponent                                            |
| 1455997_a_at | 38040.70 | 0.000244 | P | 20537.00 | 0.000244 | P | -17503.70 | -1.52 | 0.000273 | Uqcrb                                  | binding protein<br>RIKEN cDNA 2210415M14 gene                                     |
| 1460216_at   | 2343.40  | 0.000244 | P | 1201.60  | 0.000732 | P | -1141.80  | -1.52 | 0.000241 | Acads                                  | acetyl-Coenzyme A dehydrogenase, short chain                                      |
| 1415807_s_at | 738.50   | 0.005859 | P | 394.30   | 0.030273 | P | -344.20   | -1.62 | 0.002753 | Sfrs2                                  | splicing factor, arginine/serine-rich 2 (SC-35)                                   |
| 1415880_a_at | 4952.60  | 0.000244 | P | 3067.60  | 0.000732 | P | -1885.00  | -1.62 | 0.000214 | Lamp1                                  | lysosomal membrane glycoprotein 1                                                 |
| 1416202_at   | 1949.10  | 0.000244 | P | 1128.40  | 0.000732 | P | -820.70   | -1.62 | 0.000167 | Phb2                                   | B-cell receptor-associated protein 37                                             |
| 1416204_at   | 5126.20  | 0.000732 | P | 2894.60  | 0.000732 | P | -2231.60  | -1.62 | 0.000023 | Gpd1                                   | glycerol-3-phosphate dehydrogenase 1 (soluble)                                    |
| 1416269_at   | 9272.80  | 0.000244 | P | 5905.00  | 0.000244 | P | -3367.80  | -1.62 | 0.000078 | Atp5j2                                 | ATP synthase, H+ transporting, mitochondrial F0 complex, subunit f, isoform 2     |
| 1416479_a_at | 2287.10  | 0.000244 | P | 1293.00  | 0.000244 | P | -994.10   | -1.62 | 0.000692 | Tmem14c                                | RIKEN cDNA 1110021D01 gene                                                        |
| 1416547_at   | 3669.80  | 0.000244 | P | 2932.20  | 0.000732 | P | -737.60   | -1.62 | 0.000078 | Ndufb3                                 | RIKEN cDNA 2700033I16 gene                                                        |
| 1416604_at   | 11321.10 | 0.000244 | P | 7867.20  | 0.000244 | P | -3453.90  | -1.62 | 0.000865 | Cyc1                                   | cytochrome c-1                                                                    |
| 1416779_at   | 879.50   | 0.000732 | P | 551.10   | 0.001221 | P | -328.40   | -1.62 | 0.003699 | Sdpr                                   | serum deprivation response                                                        |
| 1416850_s_at | 3073.90  | 0.000244 | P | 2149.70  | 0.000244 | P | -924.20   | -1.62 | 0.000189 | Zcd1                                   | DNA segment, Chr 10, ERATO Doi 214, expressed                                     |
| 1416971_at   | 11400.20 | 0.000244 | P | 7542.20  | 0.000244 | P | -3858.00  | -1.62 | 0.000030 | Cox7a2                                 | cytochrome c oxidase, subunit VIIa 2                                              |
| 1417023_a_at | 39424.70 | 0.000244 | P | 23772.60 | 0.000732 | P | -15652.10 | -1.62 | 0.000023 | Fabp4                                  | fatty acid binding protein 4, adipocyte                                           |
| 1417373_a_at | 1062.60  | 0.000244 | P | 527.80   | 0.001221 | P | -534.80   | -1.62 | 0.000046 | Tuba4a                                 | tubulin, alpha 4                                                                  |
| 1417654_at   | 9162.10  | 0.000244 | P | 6376.50  | 0.000244 | P | -2785.60  | -1.62 | 0.000241 | Sdc4                                   | syndecan 4                                                                        |
| 1417864_at   | 4041.00  | 0.000244 | P | 2754.30  | 0.000244 | P | -1286.70  | -1.62 | 0.000189 | Pgk1<br>EG433594 ///<br>EG668435 ///   | phosphoglycerate kinase 1                                                         |
| 1418190_at   | 631.50   | 0.001221 | P | 421.00   | 0.030273 | P | -210.50   | -1.62 | 0.000774 | Pon1                                   | paraoxonase 1                                                                     |
| 1418658_at   | 780.40   | 0.000244 | P | 395.50   | 0.001221 | P | -384.90   | -1.62 | 0.000346 | Rik                                    | RIKEN cDNA 2410005O16 gene                                                        |
| 1419137_at   | 574.20   | 0.00415  | P | 402.80   | 0.014160 | P | -171.40   | -1.62 | 0.003041 | Shank3                                 | SH3/ankyrin domain gene 3                                                         |
| 1419814_s_at | 2979.00  | 0.000244 | P | 2053.90  | 0.000244 | P | -925.10   | -1.62 | 0.000966 | S100a1                                 | S100 calcium binding protein A1                                                   |
| 1420089_at   | 1017.00  | 0.000244 | P | 556.40   | 0.008057 | P | -460.60   | -1.62 | 0.000241 | Nfkbia                                 | nuclear factor of kappa light chain gene enhancer in B-cells inhibitor, alpha     |

|              |          |          |   |  |          |          |   |  |          |       |          |         |                                                                                                               |
|--------------|----------|----------|---|--|----------|----------|---|--|----------|-------|----------|---------|---------------------------------------------------------------------------------------------------------------|
| 1420890_at   | 449.30   | 0.008057 | P |  | 218.50   | 0.111572 | A |  | -230.80  | -1.62 | 0.001486 | Hccs    | holocytochrome c synthetase                                                                                   |
| 1421323_a_at | 742.70   | 0.000244 | P |  | 439.30   | 0.000732 | P |  | -303.40  | -1.62 | 0.002490 | G3bp2   | Ras-GTPase-activating protein (GAP<120>) SH3-domain binding protein 2                                         |
| 1421657_a_at | 551.60   | 0.000244 | P |  | 346.80   | 0.046143 | P |  | -204.80  | -1.62 | 0.000492 | Sox17   | SRY-box containing gene 17                                                                                    |
| 1422241_a_at | 7941.80  | 0.000244 | P |  | 5231.90  | 0.000244 | P |  | -2709.90 | -1.62 | 0.000865 | Ndufa1  | NADH dehydrogenase (ubiquinone) 1 alpha subcomplex, 1                                                         |
| 1422471_at   | 2227.60  | 0.000244 | P |  | 1132.70  | 0.001221 | P |  | -1094.90 | -1.62 | 0.000307 | Pex13   | peroxisomal biogenesis factor 13 monocyte to macrophage differentiation-associated                            |
| 1423489_at   | 816.90   | 0.001953 | P |  | 464.70   | 0.010742 | P |  | -352.20  | -1.62 | 0.001077 | Mmd     | RIKEN cDNA 0610033L03 gene                                                                                    |
| 1423692_at   | 5507.30  | 0.000244 | P |  | 3443.00  | 0.000244 | P |  | -2064.30 | -1.62 | 0.000114 | Ndufa8  | kinesin family member 1B                                                                                      |
| 1423994_at   | 866.50   | 0.000244 | P |  | 502.90   | 0.000244 | P |  | -363.60  | -1.62 | 0.000101 | Kif1b   | NADH dehydrogenase (ubiquinone) 1 alpha subcomplex, 4                                                         |
| 1424085_at   | 11281.00 | 0.000244 | P |  | 6934.20  | 0.000244 | P |  | -4346.80 | -1.62 | 0.000027 | Ndufa4  | thymotroph embryonic factor                                                                                   |
| 1424175_at   | 899.40   | 0.010742 | P |  | 381.40   | 0.018555 | P |  | -518.00  | -1.62 | 0.001336 | Tef     | RIKEN cDNA 1010001M04 gene                                                                                    |
| 1424313_a_at | 8544.30  | 0.000244 | P |  | 5305.10  | 0.000244 | P |  | -3239.20 | -1.62 | 0.000040 | Ndufs7  |                                                                                                               |
| 1426114_at   | 4330.40  | 0.000732 | P |  | 2930.80  | 0.000732 | P |  | -1399.60 | -1.62 | 0.000046 | Hnrpab  | dihydrolipamide S-acetyltransferase (E2 component of pyruvate dehydrogenase complex)                          |
| 1426264_at   | 857.50   | 0.00293  | P |  | 1024.40  | 0.004150 | P |  | 166.90   | -1.62 | 0.000692 | Dlat    | RIKEN cDNA 1110030L07 gene                                                                                    |
| 1428068_at   | 4481.40  | 0.000244 | P |  | 2513.70  | 0.000244 | P |  | -1967.70 | -1.62 | 0.000078 | Samm50  | DNA segment, Chr 18, ERATO Doi 240, expressed                                                                 |
| 1428145_at   | 4166.50  | 0.000244 | P |  | 2036.00  | 0.000244 | P |  | -2130.50 | -1.62 | 0.000023 | Acaa2   | RIKEN cDNA 2610003B19 gene                                                                                    |
| 1428159_s_at | 3781.40  | 0.000732 | P |  | 2355.80  | 0.000244 | P |  | -1425.60 | -1.62 | 0.001486 | Ndufab1 |                                                                                                               |
| 1431619_a_at | 618.00   | 0.00293  | P |  | 464.40   | 0.002930 | P |  | -153.60  | -1.62 | 0.003699 | Dtnbp1  | expressed sequence AI267078                                                                                   |
| 1433720_s_at | 11065.60 | 0.000244 | P |  | 7615.00  | 0.000244 | P |  | -3450.60 | -1.62 | 0.000046 | Ndg2    | malate dehydrogenase, mitochondrial                                                                           |
| 1433984_a_at | 7078.20  | 0.000244 | P |  | 3979.10  | 0.000244 | P |  | -3099.10 | -1.62 | 0.000020 | Mdh2    | hypothetical protein MGC37950                                                                                 |
| 1434213_x_at | 2474.10  | 0.018555 | P |  | 1540.20  | 0.018555 | P |  | -933.90  | -1.62 | 0.002032 | Ndufs8  | hypothetical protein MGC37950                                                                                 |
| 1434579_x_at | 5811.90  | 0.000244 | P |  | 3456.00  | 0.000244 | P |  | -2355.90 | -1.62 | 0.000273 | Ndufs8  | proteasome (prosome, macropain) subunit, alpha type 6                                                         |
| 1435317_x_at | 477.10   | 0.018555 | P |  | 296.70   | 0.056152 | M |  | -180.40  | -1.62 | 0.001832 | Psma6   | RIKEN cDNA 1500004O06 gene                                                                                    |
| 1435757_a_at | 9481.50  | 0.005859 | P |  | 4476.20  | 0.000732 | P |  | -5005.30 | -1.62 | 0.001201 | Uqcrc2  | bromodomain containing 2                                                                                      |
| 1437210_a_at | 1030.40  | 0.000732 | P |  | 771.80   | 0.005859 | P |  | -258.60  | -1.62 | 0.001077 | Brd2    | diazepam binding inhibitor                                                                                    |
| 1438093_x_at | 797.60   | 0.00293  | P |  | 627.00   | 0.067627 | A |  | -170.60  | -1.62 | 0.004073 | Dbi     | cytochrome c oxidase, subunit Va                                                                              |
| 1448153_at   | 9856.10  | 0.000244 | P |  | 5461.00  | 0.000244 | P |  | -4395.10 | -1.62 | 0.000020 | Cox5a   | upregulated during skeletal muscle growth 5                                                                   |
| 1448179_at   | 2268.10  | 0.005859 | P |  | 1134.80  | 0.018555 | P |  | -1133.30 | -1.62 | 0.000214 | Usmg5   | RIKEN cDNA 2900010I05 gene                                                                                    |
| 1448198_a_at | 3925.00  | 0.000244 | P |  | 2378.20  | 0.000244 | P |  | -1546.80 | -1.62 | 0.003699 | Ndufb8  | lactate dehydrogenase 2, B chain                                                                              |
| 1448237_x_at | 5610.70  | 0.000244 | P |  | 3557.10  | 0.000244 | P |  | -2053.60 | -1.62 | 0.000078 | Ldhb    | laminin receptor 1 (ribosomal protein SA)                                                                     |
| 1448245_at   | 10383.60 | 0.000244 | P |  | 6211.20  | 0.000244 | P |  | -4172.40 | -1.62 | 0.000060 | Rpsa    | NADH dehydrogenase (ubiquinone) 1, subcomplex unknown, 1                                                      |
| 1448284_a_at | 6340.10  | 0.000732 | P |  | 3478.10  | 0.000732 | P |  | -2862.00 | -1.62 | 0.000130 | Ndufc1  | cytochrome c oxidase, subunit IVa                                                                             |
| 1448322_a_at | 18910.80 | 0.000244 | P |  | 10582.80 | 0.000244 | P |  | -8328.00 | -1.62 | 0.000101 | Cox4i1  | GPI-anchored membrane protein 1                                                                               |
| 1448347_a_at | 637.30   | 0.000244 | P |  | 448.60   | 0.014160 | P |  | -188.70  | -1.62 | 0.001077 | Caprin1 | RIKEN cDNA 1210001E11 gene                                                                                    |
| 1448454_at   | 1105.50  | 0.001221 | P |  | 626.60   | 0.000244 | P |  | -478.90  | -1.62 | 0.002250 | Sfrs6   | sphingomyelin phosphodiesterase 1, acid lysosomal                                                             |
| 1448621_a_at | 740.10   | 0.000244 | P |  | 404.70   | 0.000244 | P |  | -335.40  | -1.62 | 0.001651 | Smpd1   | eukaryotic translation initiation factor 2, subunit 2 (beta)                                                  |
| 1448820_a_at | 459.70   | 0.01416  | P |  | 346.40   | 0.023926 | P |  | -113.30  | -1.62 | 0.001077 | Erf2s2  | mitochondrial ribosomal protein L39                                                                           |
| 1448909_a_at | 3416.20  | 0.000244 | P |  | 1685.20  | 0.000732 | P |  | -1731.00 | -1.62 | 0.000089 | Mrpl39  | RIKEN cDNA 2900053E13 gene                                                                                    |
| 1448934_at   | 6432.60  | 0.000244 | P |  | 4726.10  | 0.000244 | P |  | -1706.50 | -1.62 | 0.001651 | Ndufa10 | neuroilin                                                                                                     |
| 1448943_at   | 918.10   | 0.001221 | P |  | 408.50   | 0.005859 | P |  | -509.60  | -1.62 | 0.000167 | Nrp1    | hydroxysteroid 11-beta dehydrogenase 1                                                                        |
| 1449038_at   | 2084.80  | 0.000244 | P |  | 912.70   | 0.000244 | P |  | -1172.10 | -1.62 | 0.004481 | Hsd11b1 | tissue inhibitor of metalloproteinase 3                                                                       |
| 1449335_at   | 6915.90  | 0.000244 | P |  | 3972.00  | 0.000244 | P |  | -2943.90 | -1.62 | 0.000492 | Timp3   | cancer related gene-liver 1                                                                                   |
| 1451355_at   | 568.00   | 0.000244 | P |  | 334.20   | 0.014160 | P |  | -233.80  | -1.62 | 0.000552 | Asah3l  | HRAS like suppressor 3                                                                                        |
| 1451611_at   | 872.10   | 0.000244 | P |  | 649.50   | 0.000732 | P |  | -222.60  | -1.62 | 0.000030 | Hrasls3 | DNA segment, Chr 18, ERATO Doi 240, expressed                                                                 |
| 1455061_a_at | 2564.20  | 0.000244 | P |  | 1626.20  | 0.000244 | P |  | -938.00  | -1.62 | 0.002753 | Acaa2   | lactate dehydrogenase 2, B chain                                                                              |
| 1455235_x_at | 7107.00  | 0.000244 | P |  | 3495.00  | 0.000244 | P |  | -3612.00 | -1.62 | 0.001336 | Ldhb    | expressed sequence C77892                                                                                     |
| 1456112_at   | 423.20   | 0.00415  | P |  | 248.40   | 0.018555 | P |  | -174.80  | -1.62 | 0.000346 | Tpr     | TOB3                                                                                                          |
| 1456541_x_at | 246.40   | 0.030273 | P |  | 89.70    | 0.171387 | A |  | -156.70  | -1.62 | 0.003699 | Atad3a  | mitochondrial ribosomal protein L52                                                                           |
| 1460701_a_at | 1356.80  | 0.056152 | M |  | 531.50   | 0.080566 | A |  | -825.30  | -1.62 | 0.001651 | Mrpl52  |                                                                                                               |
| 1415966_a_at | 8461.30  | 0.000488 | P |  | 4568.00  | 0.000488 | P |  | -3893.30 | -1.74 | 0.000044 | Ndufv1  | NADH dehydrogenase (ubiquinone) flavoprotein 1                                                                |
| 1416093_a_at | 1003.60  | 0.000732 | P |  | 551.30   | 0.005859 | P |  | -452.30  | -1.74 | 0.000774 | Mrpl20  | mitochondrial ribosomal protein L20                                                                           |
| 1416194_at   | 960.30   | 0.000244 | P |  | 405.60   | 0.004150 | P |  | -554.70  | -1.74 | 0.004481 | Cyp4b1  | cytochrome P450, subfamily IV B, polypeptide 1 translocase of inner mitochondrial membrane 23 homolog (yeast) |
| 1416485_at   | 5103.10  | 0.000244 | P |  | 3212.00  | 0.000244 | P |  | -1891.10 | -1.74 | 0.000167 | Timm23  | NADH dehydrogenase (ubiquinone) Fe-S protein 5                                                                |
| 1416495_s_at | 1970.50  | 0.000244 | P |  | 1233.30  | 0.001221 | P |  | -737.20  | -1.74 | 0.000147 | Ndufs5  | RIKEN cDNA 2410043G19 gene                                                                                    |
| 1416567_s_at | 7287.10  | 0.000244 | P |  | 3725.50  | 0.000244 | P |  | -3561.60 | -1.74 | 0.000020 | Atp5e   | acetyl-Coenzyme A synthetase 2 (AMP forming)-like                                                             |
| 1416617_at   | 836.80   | 0.000244 | P |  | 433.30   | 0.005859 | P |  | -403.50  | -1.74 | 0.000101 | Accs1   | carntine palmitoyltransferase 2                                                                               |
| 1416772_at   | 1971.70  | 0.000244 | P |  | 1093.20  | 0.000244 | P |  | -878.50  | -1.74 | 0.000101 | Cpt2    | DNA segment, Chr 10, ERATO Doi 214, expressed                                                                 |
| 1416849_at   | 863.10   | 0.000732 | P |  | 552.50   | 0.001953 | P |  | -310.60  | -1.74 | 0.000966 | Zcd1    | RIKEN cDNA 2010317E03 gene                                                                                    |
| 1416939_at   | 4005.10  | 0.000732 | P |  | 2513.60  | 0.000244 | P |  | -1491.50 | -1.74 | 0.000147 | Ppa1    | cytochrome c oxidase, subunit VIIa 2                                                                          |
| 1416970_a_at | 20133.30 | 0.000244 | P |  | 11925.40 | 0.000244 | P |  | -8207.90 | -1.74 | 0.000035 | Cox7a2  | EG665511 ///                                                                                                  |
| 1417053_at   | 2440.30  | 0.000244 | P |  | 1123.80  | 0.000244 | P |  | -1316.50 | -1.74 | 0.000089 | Phb     | prohibitin                                                                                                    |
| 1417102_a_at | 1521.90  | 0.005859 | P |  | 453.20   | 0.008057 | P |  | -1068.70 | -1.74 | 0.000130 | Ndufb5  | NADH dehydrogenase (ubiquinone) 1 beta subcomplex, 5                                                          |
| 1417220_at   | 1235.80  | 0.000732 | P |  | 691.20   | 0.004150 | P |  | -544.60  | -1.74 | 0.000027 | Fah     | fumarylacetoacetate hydrolase                                                                                 |
| 1417591_at   | 660.70   | 0.001953 | P |  | 296.60   | 0.046143 | P |  | -364.10  | -1.74 | 0.000040 | Ptgs2   | prostaglandin E synthase 2                                                                                    |
| 1417625_s_at | 530.50   | 0.001953 | P |  | 292.60   | 0.008057 | P |  | -237.90  | -1.74 | 0.000214 | Cxcr7   | chemokine orphan receptor 1                                                                                   |
| 1417722_at   | 1312.40  | 0.000244 | P |  | 737.60   | 0.000244 | P |  | -574.80  | -1.74 | 0.004073 | Pgls    | 6-phosphogluconolactonase                                                                                     |
| 1417892_a_at | 532.30   | 0.000732 | P |  | 179.80   | 0.194580 | A |  | -352.50  | -1.74 | 0.004073 | Sirt3   | sirtuin 3 (silent mating type information regulation 2, homolog) 3 (S. cerevisiae)                            |
| 1418321_at   | 8623.30  | 0.000244 | P |  | 4747.20  | 0.000244 | P |  | -3876.10 | -1.74 | 0.000241 | Dci     | dodecenoyl-Coenzyme A delta isomerase (3,2 trans-enoyl-Coenzyme A isomerase)                                  |
| 1418982_at   | 1395.40  | 0.001221 | P |  | 756.50   | 0.001953 | P |  | -638.90  | -1.74 | 0.001832 | Cebpa   | CCAAT/enhancer binding protein (C/EBP), alpha                                                                 |
| 1421025_at   | 740.20   | 0.005859 | P |  | 267.10   | 0.067627 | A |  | -473.10  | -1.74 | 0.000030 | Agpat1  | 1-acylglycerol-3-phosphate O-acyltransferase 1 (lysophosphatidic acid acyltransferase, alpha)                 |
| 1422470_at   | 4236.40  | 0.000244 | P |  | 2587.90  | 0.000244 | P |  | -1648.50 | -1.74 | 0.000046 | Bnip3   | BCL2/adenovirus E1B 19 kDa-interacting protein 1, NIP3                                                        |
| 1422484_at   | 3143.60  | 0.000244 | P |  | 2097.80  | 0.000732 | P |  | -1045.80 | -1.74 | 0.001336 | Cyca    | cytochrome c, somatic                                                                                         |
| 1422605_at   | 473.20   | 0.001221 | P |  | 197.00   | 0.194580 | A |  | -276.20  | -1.74 | 0.000966 | Ppp1r1a | protein phosphatase 1, regulatory (inhibitor) subunit 1A                                                      |
| 1422677_at   | 5020.10  | 0.000244 | P |  | 3839.40  | 0.000244 | P |  | -1180.70 | -1.74 | 0.000068 | Dgat2   | diacylglycerol O-acyltransferase 2                                                                            |
| 1423043_s_at | 2932.10  | 0.000244 | P |  | 1914.00  | 0.000244 | P |  | -1018.10 | -1.74 | 0.000346 | Ddx3x   | DEAD/H (Asp-Glu-Ala-Asp/His) box polypeptide 3                                                                |
| 1423239_at   | 713.10   | 0.005859 | P |  | 345.00   | 0.129639 | A |  | -368.10  | -1.74 | 0.000060 | Impdh1  | RIKEN cDNA B930086D20 gene                                                                                    |
| 1423475_at   | 584.30   | 0.000244 | P |  | 211.30   | 0.056152 | M |  | -373.00  | -1.74 | 0.001486 | Cnm2    | cyclin M2                                                                                                     |
| 1423766_at   | 636.20   | 0.018555 | P |  | 383.00   | 0.046143 | P |  | -253.20  | -1.74 | 0.000438 |         |                                                                                                               |

|              |          |            |          |            |           |       |          |                                                  |                                                                                                                                                    |
|--------------|----------|------------|----------|------------|-----------|-------|----------|--------------------------------------------------|----------------------------------------------------------------------------------------------------------------------------------------------------|
| 1426351_at   | 2149.30  | 0.000244 P | 1393.60  | 0.000244 P | -755.70   | -1.74 | 0.000030 | Hspd1                                            | heat shock protein 1 (chaperonin)                                                                                                                  |
| 1428116_a_at | 2156.10  | 0.000244 P | 1137.70  | 0.000244 P | -1018.40  | -1.74 | 0.000492 | Dynl1                                            | t-complex testis expressed 1                                                                                                                       |
| 1428689_at   | 448.50   | 0.000244 P | 280.10   | 0.095215 A | -168.40   | -1.74 | 0.000966 | Tysnd1                                           | RIKEN cDNA 1300019N10 gene                                                                                                                         |
| 1428690_at   | 271.00   | 0.005859 P | 121.90   | 0.334473 A | -149.10   | -1.74 | 0.003355 | Tysnd1                                           | RIKEN cDNA 1300019N10 gene                                                                                                                         |
| 1434177_at   | 1051.80  | 0.00293 P  | 682.30   | 0.008057 P | -369.50   | -1.74 | 0.000865 | Ece1                                             | Mus musculus, clone IMAGE:4196918, mRNA                                                                                                            |
| 1434768_at   | 545.90   | 0.00415 P  | 331.00   | 0.037598 P | -214.90   | -1.74 | 0.003699 | Tpp1                                             | ceroid-lipofuscinosis, neuronal 2                                                                                                                  |
| 1434799_x_at | 11220.90 | 0.000244 P | 6222.40  | 0.000244 P | -4998.50  | -1.74 | 0.000023 | Aldoa                                            | aldolase 1, A isoform                                                                                                                              |
| 1434923_at   | 673.50   | 0.00415 P  | 497.10   | 0.056152 M | -176.40   | -1.74 | 0.001201 | Cox19                                            | RIKEN cDNA 2810437L13 gene                                                                                                                         |
| 1435112_a_at | 8370.80  | 0.000244 P | 4533.20  | 0.000244 P | -3837.60  | -1.74 | 0.000020 | Atp5h                                            | RIKEN cDNA 0610009D10 gene                                                                                                                         |
| 1435376_at   | 2087.90  | 0.000244 P | 1042.30  | 0.000732 P | -1045.60  | -1.74 | 0.000101 | Dhdh2                                            | ESTs, Weakly similar to RIKEN cDNA 5730493B19 [Mus musculus] [M. musculus]                                                                         |
| 1435613_x_at | 31379.30 | 0.000244 P | 17888.60 | 0.000244 P | -13490.70 | -1.74 | 0.000023 | Cox5b                                            | cytochrome c oxidase, subunit Vb                                                                                                                   |
| 1436946_s_at | 758.10   | 0.001953 P | 475.60   | 0.004150 P | -282.50   | -1.74 | 0.001486 | Gng5                                             | guanine nucleotide binding protein (G protein), gamma 5 subunit                                                                                    |
| 1437100_x_at | 2573.00  | 0.000732 P | 1505.40  | 0.001221 P | -1067.60  | -1.74 | 0.000147 | Pim3                                             | similar to Serine/threonine-protein kinase pim-3                                                                                                   |
| 1437301_a_at | 722.60   | 0.001953 P | 240.60   | 0.046143 P | -482.00   | -1.74 | 0.003041 | Dvl1                                             | dishevelled, dsh homolog 1 (Drosophila)                                                                                                            |
| 1437832_x_at | 435.70   | 0.001221 P | 167.00   | 0.171387 A | -268.70   | -1.74 | 0.000438 | Wars                                             | tryptophanyl-tRNA synthetase                                                                                                                       |
| 1438630_x_at | 728.80   | 0.001953 P | 284.40   | 0.001953 P | -444.40   | -1.74 | 0.001486 | Mat2a                                            | methionine adenosyltransferase II, alpha                                                                                                           |
| 1439267_x_at | 1237.20  | 0.001221 P | 623.60   | 0.000732 P | -613.60   | -1.74 | 0.002250 | Cox5a                                            | cytochrome c oxidase, subunit Va                                                                                                                   |
| 1447919_x_at | 1574.90  | 0.000244 P | 897.90   | 0.000244 P | -677.00   | -1.74 | 0.001651 | Ndufab1                                          | RIKEN cDNA 2610003B19 gene                                                                                                                         |
| 1448292_at   | 8088.30  | 0.000244 P | 4995.30  | 0.000244 P | -3093.00  | -1.74 | 0.000020 | Uqcrr                                            | RIKEN cDNA 0710008D09 gene                                                                                                                         |
| 1448610_a_at | 7254.40  | 0.000244 P | 3984.20  | 0.000244 P | -3270.20  | -1.74 | 0.000046 | Sod2                                             | superoxide dismutase 2, mitochondrial                                                                                                              |
| 1449081_at   | 7479.40  | 0.000732 P | 3569.50  | 0.000732 P | -3909.90  | -1.74 | 0.000101 | Ces3                                             | carboxylesterase 3                                                                                                                                 |
| 1449182_at   | 452.40   | 0.005859 P | 268.90   | 0.000244 P | -183.50   | -1.74 | 0.004073 | Retn                                             | resistin                                                                                                                                           |
| 1449218_at   | 32841.90 | 0.000244 P | 19130.60 | 0.000244 P | -13711.30 | -1.74 | 0.000307 | Cox8b                                            | cytochrome c oxidase, subunit VIIIb                                                                                                                |
| 1450011_at   | 2309.90  | 0.00293 P  | 1406.60  | 0.000244 P | -903.30   | -1.74 | 0.002250 | Hsd17b12                                         | hydroxysteroid (17-beta) dehydrogenase 12                                                                                                          |
| 1450668_s_at | 1011.90  | 0.000732 P | 553.50   | 0.018555 P | -458.40   | -1.74 | 0.001651 | Hspe1                                            | heat shock protein 1 (chaperonin 10)                                                                                                               |
| 1450727_a_at | 979.60   | 0.000244 P | 580.30   | 0.000732 P | -399.30   | -1.74 | 0.000068 | Poldip2                                          | RIKEN cDNA 1300003F06 gene                                                                                                                         |
| 1451067_at   | 1060.20  | 0.000244 P | 584.00   | 0.000244 P | -476.20   | -1.74 | 0.000189 | Sgta                                             | small glutamine-rich tetratricopeptide repeat (TPR)-containing                                                                                     |
| 1451149_at   | 893.80   | 0.001953 P | 470.70   | 0.005859 P | -423.10   | -1.74 | 0.000865 | Pgm2                                             | RIKEN cDNA 2610020G18 gene                                                                                                                         |
| 1452782_a_at | 996.20   | 0.000244 P | 598.40   | 0.010742 P | -397.80   | -1.74 | 0.001077 | Txn2                                             | thioredoxin 2                                                                                                                                      |
|              |          |            |          |            |           |       |          | LOC545044<br>///<br>LOC667034                    |                                                                                                                                                    |
| 1453299_a_at | 893.40   | 0.000244 P | 488.60   | 0.000244 P | -404.80   | -1.74 | 0.000068 | Pnp                                              | purine-nucleoside phosphorylase                                                                                                                    |
| 1453836_a_at | 1674.90  | 0.000244 P | 1044.80  | 0.000732 P | -630.10   | -1.74 | 0.000147 | Mgll                                             | monoglyceride lipase                                                                                                                               |
| 1454716_x_at | 14201.90 | 0.000244 P | 8662.90  | 0.000244 P | -5539.00  | -1.74 | 0.000023 | Cox5b                                            | cytochrome c oxidase, subunit Vb                                                                                                                   |
| 1455789_x_at | 3511.60  | 0.001953 P | 1878.00  | 0.005859 P | -1633.60  | -1.74 | 0.004481 | Hspa8                                            | heat shock protein 8                                                                                                                               |
| 1455911_x_at | 7017.00  | 0.000244 P | 4403.40  | 0.000732 P | -2613.60  | -1.74 | 0.000273 | Ndufb11                                          | nuclear protein 15.6                                                                                                                               |
| 1455972_x_at | 37499.80 | 0.000244 P | 21492.00 | 0.000244 P | -16007.80 | -1.74 | 0.000020 | Hadh                                             | L-3-hydroxyacyl-Coenzyme A dehydrogenase, short chain                                                                                              |
| 1456015_x_at | 7509.80  | 0.000244 P | 3767.40  | 0.000244 P | -3742.40  | -1.74 | 0.000346 | Ndufv1                                           | NADH dehydrogenase (ubiquinone) flavoprotein 1                                                                                                     |
|              |          |            |          |            |           |       |          | Gpx4<br>///                                      |                                                                                                                                                    |
| 1456193_x_at | 6359.40  | 0.000732 P | 2986.20  | 0.000244 P | -3373.20  | -1.74 | 0.000492 | LOC671271                                        | glutathione peroxidase 4                                                                                                                           |
| 1456580_s_at | 17685.30 | 0.000244 P | 8930.00  | 0.000244 P | -8755.30  | -1.74 | 0.000052 | Atp5d                                            | RIKEN cDNA 0610008F14 gene                                                                                                                         |
| 1460184_at   | 8080.40  | 0.000732 P | 4715.80  | 0.000732 P | -3364.60  | -1.74 | 0.000061 | Hadh                                             | L-3-hydroxyacyl-Coenzyme A dehydrogenase, short chain                                                                                              |
|              |          |            |          |            |           |       |          | EG240289<br>///<br>LOC636660<br>///<br>LOC672201 |                                                                                                                                                    |
| 1460198_a_at | 4089.90  | 0.000244 P | 2483.60  | 0.000244 P | -1606.30  | -1.74 | 0.000030 | Psmb3                                            | proteasome (prosome, vacuolain) subunit, beta type 3                                                                                               |
| 1415891_at   | 5949.80  | 0.000244 P | 4846.70  | 0.000732 P | -1103.10  | -1.87 | 0.000389 | Suclg1                                           | succinate-CoA ligase, GDP-forming, alpha subunit                                                                                                   |
| 1415972_at   | 203.70   | 0.008057 P | 47.60    | 0.466064 A | -156.10   | -1.87 | 0.000552 | Marcks                                           | myristoylated alanine rich protein kinase C substrate                                                                                              |
| 1416056_a_at | 8950.20  | 0.000244 P | 4948.00  | 0.000244 P | -4002.20  | -1.87 | 0.000020 | Ndufb11                                          | nuclear protein 15.6                                                                                                                               |
| 1416245_at   | 1881.10  | 0.000244 P | 1254.00  | 0.000244 P | -627.10   | -1.87 | 0.002032 | Aurkaip1                                         | RIKEN cDNA 0610033H09 gene                                                                                                                         |
| 1416278_a_at | 7829.80  | 0.000244 P | 3471.20  | 0.000244 P | -4358.60  | -1.87 | 0.000068 | Atp5o                                            | ATP synthase, H+ transporting, mitochondrial F1 complex, O subunit                                                                                 |
| 1416545_at   | 499.00   | 0.008057 P | 230.20   | 0.149658 A | -268.80   | -1.87 | 0.000068 | Zdhhc7                                           | zinc finger, DHHC domain containing 7                                                                                                              |
| 1416616_s_at | 572.90   | 0.000244 P | 354.90   | 0.023926 P | -218.00   | -1.87 | 0.000618 | Clpp                                             | caseolytic protease, ATP-dependent, proteolytic subunit homolog (E. coli)                                                                          |
| 1416679_at   | 2201.50  | 0.000244 P | 985.20   | 0.000244 P | -1216.30  | -1.87 | 0.000552 | Abcd3                                            | ATP-binding cassette, sub-family D (ALD), member 3                                                                                                 |
| 1416910_at   | 2960.70  | 0.000244 P | 1348.90  | 0.000244 P | -1611.80  | -1.87 | 0.000020 | Dnajc15                                          | RIKEN cDNA 1110003P16 gene                                                                                                                         |
| 1416951_a_at | 394.70   | 0.01416 P  | 201.00   | 0.111572 A | -193.70   | -1.87 | 0.001651 | Atp6v1d                                          | ATPase, H+ transporting, V1 subunit D                                                                                                              |
| 1416981_at   | 965.00   | 0.001953 P | 506.40   | 0.037598 P | -458.60   | -1.87 | 0.000147 | Foxo1                                            | forkhead box O1                                                                                                                                    |
| 1417008_at   | 1607.40  | 0.000244 P | 764.00   | 0.001221 P | -843.40   | -1.87 | 0.000078 | Crat                                             | carnitine acetyltransferase                                                                                                                        |
|              |          |            |          |            |           |       |          | 9530058B02                                       |                                                                                                                                                    |
| 1417212_at   | 1894.70  | 0.000732 P | 991.80   | 0.000732 P | -902.90   | -1.87 | 0.000020 | Rik                                              | RIKEN cDNA 9530058B02 gene                                                                                                                         |
| 1417271_a_at | 1137.20  | 0.001953 P | 590.70   | 0.008057 P | -546.50   | -1.87 | 0.003355 | Eng                                              | endoglin                                                                                                                                           |
| 1417395_at   | 465.50   | 0.000244 P | 277.00   | 0.080566 A | -188.50   | -1.87 | 0.000101 | Klf4                                             | Kruppel-like factor 4 (gut)                                                                                                                        |
| 1417432_a_at | 731.70   | 0.000244 P | 437.10   | 0.010742 P | -294.60   | -1.87 | 0.000774 | Gnb1                                             | guanine nucleotide binding protein, beta 1                                                                                                         |
| 1417611_at   | 892.90   | 0.000244 P | 338.60   | 0.014160 P | -554.30   | -1.87 | 0.003041 | Tmem37                                           | protein distantly related to to the gamma subunit family                                                                                           |
| 1418634_at   | 499.90   | 0.00293 P  | 321.20   | 0.001221 P | -178.70   | -1.87 | 0.004481 | Notch1                                           | Notch gene homolog 1, (Drosophila)                                                                                                                 |
| 1418860_a_at | 1886.00  | 0.001953 P | 1085.60  | 0.002930 P | -800.40   | -1.87 | 0.000114 | Letmd1                                           | RIKEN cDNA 1110019O13 gene                                                                                                                         |
| 1419255_at   | 811.50   | 0.000244 P | 364.90   | 0.001953 P | -446.60   | -1.87 | 0.000167 | Spnb2                                            | beta-spectrin 2, non-erythrocytic                                                                                                                  |
|              |          |            |          |            |           |       |          |                                                  | Mus musculus adult male corpora quadrigenina cDNA, RIKEN full-length enriched library, clone:B230307D21 product:unknown EST, full insert sequence. |
| 1419642_at   | 838.90   | 0.005859 P | 458.50   | 0.004150 P | -380.40   | -1.87 | 0.004481 | Purb                                             | actin, beta, cytoplasmic                                                                                                                           |
| 1419734_at   | 3827.40  | 0.000244 P | 2535.30  | 0.000244 P | -1292.10  | -1.87 | 0.000552 | Actb                                             |                                                                                                                                                    |
|              |          |            |          |            |           |       |          | 1700021F05                                       |                                                                                                                                                    |
| 1421019_at   | 1026.90  | 0.000244 P | 467.30   | 0.000244 P | -559.60   | -1.87 | 0.000774 | Rik                                              | RIKEN cDNA 1700021F05 gene                                                                                                                         |
| 1422501_s_at | 2923.20  | 0.000732 P | 1348.50  | 0.000732 P | -1574.70  | -1.87 | 0.000214 | ldh3a                                            | isocitrate dehydrogenase 3 (NAD+) alpha                                                                                                            |
| 1422578_at   | 6872.20  | 0.000244 P | 4667.80  | 0.000244 P | -2204.40  | -1.87 | 0.000020 | Cs                                               | citrate synthase                                                                                                                                   |
| 1423108_at   | 5535.00  | 0.001953 P | 2301.90  | 0.000732 P | -3233.10  | -1.87 | 0.000060 | Slc25a20                                         | RIKEN cDNA 1110007P09 gene                                                                                                                         |
| 1423272_at   | 365.90   | 0.005859 P | 211.30   | 0.095215 A | -154.60   | -1.87 | 0.000346 | Polg                                             | polymerase (DNA directed), gamma                                                                                                                   |
| 1423710_at   | 2256.90  | 0.000244 P | 1160.80  | 0.000244 P | -1096.10  | -1.87 | 0.000774 | Dist                                             | RIKEN cDNA 4930529O08 gene                                                                                                                         |
| 1423716_s_at | 4923.00  | 0.000244 P | 2544.20  | 0.000244 P | -2378.80  | -1.87 | 0.000046 | Atp5d                                            | RIKEN cDNA 0610008F14 gene                                                                                                                         |
| 1424126_at   | 1719.70  | 0.000732 P | 676.10   | 0.001953 P | -1043.60  | -1.87 | 0.000046 | Atas1                                            | aminolevulinic acid synthase 1                                                                                                                     |
| 1424399_at   | 1281.20  | 0.000732 P | 656.30   | 0.001953 P | -624.90   | -1.87 | 0.000273 | Uck1                                             | uridine monophosphate kinase                                                                                                                       |
|              |          |            |          |            |           |       |          | BC003993<br>///<br>LOC544818                     |                                                                                                                                                    |
| 1424609_a_at | 506.60   | 0.010742 P | 151.00   | 0.080566 A | -355.60   | -1.87 | 0.003355 | Gpt1                                             | RIKEN cDNA 1300007J06 gene                                                                                                                         |
| 1426502_s_at | 461.30   | 0.001221 P | 280.50   | 0.171387 A | -180.80   | -1.87 | 0.002490 | Gpt1                                             | MAP kinase-activated protein kinase 2                                                                                                              |
| 1426648_at   | 656.30   | 0.000732 P | 477.60   | 0.008057 P | -178.70   | -1.87 | 0.003699 | Mapkapk2                                         | 6-phosphofructo-2-kinase/fructose-2,6-biphosphatase 1                                                                                              |
| 1427213_at   | 405.00   | 0.001953 P | 153.30   | 0.014160 P | -251.70   | -1.87 | 0.001651 | Pfkfb1                                           | heat shock 70kD protein 5 (glucose-regulated protein)                                                                                              |
| 1427464_s_at | 994.70   | 0.001221 P | 524.80   | 0.001221 P | -469.90   | -1.87 | 0.003041 | Hspa5                                            | 1110007M04                                                                                                                                         |
| 1427997_at   | 544.20   | 0.000244 P | 310.70   | 0.005859 P | -233.50   | -1.87 | 0.000865 | Rik                                              | RIKEN cDNA 1110007M04 gene                                                                                                                         |

|              |          |          |   |          |          |   |           |       |          |                                  |                                                                                                                                |
|--------------|----------|----------|---|----------|----------|---|-----------|-------|----------|----------------------------------|--------------------------------------------------------------------------------------------------------------------------------|
| 1428075_at   | 3772.00  | 0.000244 | P | 2262.80  | 0.000732 | P | -1509.20  | -1.87 | 0.000020 | Ndufb4                           | RIKEN cDNA 0610006N12 gene                                                                                                     |
| 1428134_at   | 2044.40  | 0.000244 | P | 1400.50  | 0.000244 | P | -643.90   | -1.87 | 0.000552 | Coq9                             | RIKEN cDNA 2310005C14 gene                                                                                                     |
| 1428143_a_at | 7658.00  | 0.000244 | P | 3143.40  | 0.000244 | P | -4514.60  | -1.87 | 0.000020 | Pnpla2                           | RIKEN cDNA 0610039C21 gene                                                                                                     |
| 1428869_at   | 245.10   | 0.018555 | P | 130.70   | 0.171387 | A | -114.40   | -1.87 | 0.004481 | Nolc1                            | nucleolar and coiled-body phosphoprotein 1                                                                                     |
| 1433603_at   | 2777.50  | 0.000732 | P | 1720.50  | 0.001953 | P | -1057.00  | -1.87 | 0.000189 | Ndufs6                           | ESTs. Highly similar to NUMM_MOUSE NADH-ubiquinone oxidoreductase 13 kDa-A subunit (Complex I-13KD-A) (Cl-13KD-A) [M.musculus] |
| 1435370_a_at | 1684.90  | 0.000244 | P | 822.00   | 0.018555 | P | -862.90   | -1.87 | 0.000030 | Ces3                             | carboxylesterase 3                                                                                                             |
| 1435446_a_at | 4064.60  | 0.000244 | P | 2709.90  | 0.000244 | P | -1354.70  | -1.87 | 0.000492 | Chpt1                            | synaptonemal complex protein 3                                                                                                 |
| 1435630_s_at | 4485.70  | 0.000244 | P | 2093.70  | 0.000244 | P | -2392.00  | -1.87 | 0.000020 | Acat2                            | t-complex protein 1, related sequence 1                                                                                        |
| 1436757_a_at | 46823.90 | 0.000244 | P | 26062.30 | 0.000244 | P | -20761.60 | -1.87 | 0.000020 | Cox6b1                           | RIKEN cDNA 2010000G05 gene                                                                                                     |
| 1436909_at   | 314.00   | 0.037598 | P | 168.30   | 0.194580 | A | -145.70   | -1.87 | 0.001336 | Slc25a44                         | RIKEN cDNA B430110G05 gene                                                                                                     |
| 1436990_s_at | 10503.60 | 0.000732 | P | 5536.20  | 0.000244 | P | -4967.40  | -1.87 | 0.000060 | Ndg2                             | expressed sequence AI267078                                                                                                    |
| 1437211_x_at | 1722.90  | 0.000732 | P | 925.80   | 0.000732 | P | -797.10   | -1.87 | 0.000438 | Elovl5                           | RIKEN cDNA 1110059L23 gene                                                                                                     |
| 1437345_a_at | 3418.20  | 0.000244 | P | 1957.90  | 0.000244 | P | -1460.30  | -1.87 | 0.000027 | Bscl2                            | G protein gamma 3 linked gene                                                                                                  |
| 1437358_at   | 365.50   | 0.001953 | P | 190.10   | 0.080566 | A | -175.40   | -1.87 | 0.002032 | Wdfy1                            | RIKEN cDNA 1700013B03 gene                                                                                                     |
| 1438001_x_at | 1489.90  | 0.000244 | P | 963.30   | 0.000244 | P | -526.60   | -1.87 | 0.000865 | Reep5                            | deleted in polyposis 1                                                                                                         |
| 1438159_x_at | 1837.80  | 0.000244 | P | 1108.60  | 0.001221 | P | -729.20   | -1.87 | 0.000618 | Ndufv2                           | NADH dehydrogenase (ubiquinone) flavoprotein 2                                                                                 |
| 1438657_x_at | 7022.30  | 0.000732 | P | 4267.80  | 0.000732 | P | -2754.50  | -1.87 | 0.000692 | Ptp4a1                           | protein tyrosine phosphatase 4a1                                                                                               |
| 1438938_x_at | 2390.70  | 0.023926 | P | 738.20   | 0.010742 | P | -1652.50  | -1.87 | 0.002490 | Phb2                             | B-cell receptor-associated protein 37                                                                                          |
| 1439410_x_at | 6871.40  | 0.000244 | P | 3619.30  | 0.000244 | P | -3252.10  | -1.87 | 0.000040 | Slc25a39                         | RIKEN cDNA 3010027G13 gene                                                                                                     |
| 1448543_at   | 640.80   | 0.018555 | P | 415.00   | 0.018555 | P | -225.80   | -1.87 | 0.000273 | Slmo2                            | RIKEN cDNA 2310042G06 gene                                                                                                     |
| 1448801_a_at | 1388.50  | 0.000244 | P | 579.90   | 0.001221 | P | -808.60   | -1.87 | 0.000147 | Timm44                           | translocator of inner mitochondrial membrane 44                                                                                |
| 1448830_at   | 7104.60  | 0.000244 | P | 3659.30  | 0.000244 | P | -3445.30  | -1.87 | 0.000052 | Dusp1                            | dual specificity phosphatase 1                                                                                                 |
| 1449118_at   | 613.90   | 0.000732 | P | 321.10   | 0.000244 | P | -292.80   | -1.87 | 0.000346 | Dbt                              | dihydroliipoamide branched chain transacylase E2                                                                               |
| 1449342_at   | 5136.40  | 0.000244 | P | 2703.90  | 0.000244 | P | -2432.50  | -1.87 | 0.000774 | Ptplb                            | RIKEN cDNA 6330408J20 gene                                                                                                     |
| 1449443_at   | 1429.90  | 0.000732 | P | 524.30   | 0.002930 | P | -905.60   | -1.87 | 0.003041 | Decr1                            | 2,4-dienoyl CoA reductase 1, mitochondrial                                                                                     |
| 1450504_a_at | 1762.20  | 0.000732 | P | 842.60   | 0.000244 | P | -919.60   | -1.87 | 0.000307 | Agpat3                           | 1-acylglycerol-3-phosphate O-acyltransferase 3                                                                                 |
| 1450883_a_at | 8008.10  | 0.000244 | P | 4371.10  | 0.000244 | P | -3637.00  | -1.87 | 0.000040 | Cd36                             | CD36 antigen                                                                                                                   |
| 1451296_x_at | 941.60   | 0.000732 | P | 429.60   | 0.008057 | P | -512.00   | -1.87 | 0.000618 | Pabpc4                           | poly(A) binding protein, cytoplasmic 4 (inducible form)                                                                        |
| 1451695_a_at | 5227.40  | 0.000244 | P | 3027.00  | 0.000244 | P | -2200.40  | -1.87 | 0.000020 | Gpx4                             | glutathione peroxidase 4                                                                                                       |
| 1452058_a_at | 1388.90  | 0.000732 | P | 1106.40  | 0.000244 | P | -282.50   | -1.87 | 0.001832 | Rnf11                            | ring finger protein 11                                                                                                         |
| 1452692_a_at | 2894.00  | 0.000244 | P | 1641.00  | 0.000244 | P | -1253.00  | -1.87 | 0.000027 | Ndufv2                           | NADH dehydrogenase (ubiquinone) flavoprotein 2                                                                                 |
| 1454067_a_at | 1136.10  | 0.000244 | P | 642.80   | 0.000244 | P | -493.30   | -1.87 | 0.002250 | Rik                              | RIKEN cDNA 4931406C07 gene                                                                                                     |
| 1454813_at   | 5075.90  | 0.000244 | P | 3010.20  | 0.000244 | P | -2065.70  | -1.87 | 0.000078 | Ccdc72                           | RIKEN cDNA 1110017O22 gene                                                                                                     |
| 1455211_a_at | 2459.60  | 0.000244 | P | 1293.10  | 0.000732 | P | -1166.50  | -1.87 | 0.000023 | Timm13                           | translocase of inner mitochondrial membrane 9 homolog (yeast)                                                                  |
| 1455283_x_at | 7351.90  | 0.000244 | P | 4307.50  | 0.001221 | P | -3044.40  | -1.87 | 0.000438 | Ndufs8                           | hypothetical protein MGC37950                                                                                                  |
| 1455958_s_at | 653.50   | 0.000732 | P | 386.10   | 0.010742 | P | -267.40   | -1.87 | 0.000774 | Pptc7                            | RIKEN cDNA 9130017A15 gene                                                                                                     |
| 1456603_at   | 746.80   | 0.000732 | P | 357.50   | 0.014160 | P | -389.30   | -1.87 | 0.000078 | Rik                              | RIKEN cDNA 1500005K14 gene                                                                                                     |
| 1456615_a_at | 445.90   | 0.00415  | P | 224.80   | 0.037598 | P | -221.10   | -1.87 | 0.001336 | Bptf                             | hypothetical protein LOC207165                                                                                                 |
| 1460411_s_at | 917.20   | 0.000244 | P | 512.80   | 0.001221 | P | -404.40   | -1.87 | 0.000865 | AW548124                         | expressed sequence AI115348                                                                                                    |
| 1415958_at   | 1929.20  | 0.005859 | P | 790.40   | 0.018555 | P | -1138.80  | -2.00 | 0.000046 | Slc2a4                           | solute carrier family 2 (facilitated glucose transporter), member 4                                                            |
| 1416608_a_at | 1066.10  | 0.00415  | P | 553.90   | 0.001953 | P | -512.20   | -2.00 | 0.000346 | BC004004                         | cDNA sequence BC004004                                                                                                         |
| 1417193_at   | 4811.40  | 0.000244 | P | 2533.80  | 0.000244 | P | -2277.60  | -2.00 | 0.000020 | Sod2                             | superoxide dismutase 2, mitochondrial                                                                                          |
| 1417251_at   | 659.50   | 0.00293  | P | 371.90   | 0.030273 | P | -287.60   | -2.00 | 0.000147 | Palmd                            | palmidelin                                                                                                                     |
| 1417273_at   | 7501.40  | 0.000244 | P | 4067.90  | 0.000244 | P | -3433.50  | -2.00 | 0.000020 | Pdk4                             | pyruvate dehydrogenase kinase, isoenzyme 4                                                                                     |
| 1417285_a_at | 2164.40  | 0.000244 | P | 992.40   | 0.000732 | P | -1172.00  | -2.00 | 0.000052 | Ndufa5                           | RIKEN cDNA 2900002J19 gene                                                                                                     |
| 1417320_at   | 1373.60  | 0.000732 | P | 666.60   | 0.008057 | P | -707.00   | -2.00 | 0.000023 | Grpel1                           | GrpE-like 1, mitochondrial                                                                                                     |
| 1417839_at   | 2648.70  | 0.000244 | P | 1234.70  | 0.000732 | P | -1414.00  | -2.00 | 0.000020 | Cldn5                            | claudin 5                                                                                                                      |
| 1417841_at   | 788.80   | 0.000244 | P | 491.10   | 0.010742 | P | -297.70   | -2.00 | 0.000130 | Pxmp2                            | peroxisomal membrane protein 2, 22 kDa                                                                                         |
| 1417912_at   | 1175.10  | 0.000732 | P | 516.60   | 0.000244 | P | -664.50   | -2.00 | 0.001201 | Tmem93                           | RIKEN cDNA 0610009E20 gene                                                                                                     |
| 1417985_at   | 408.90   | 0.000244 | P | 200.10   | 0.004150 | P | -208.80   | -2.00 | 0.001077 | Nrarp                            | Notch-regulated ankyrin repeat protein                                                                                         |
| 1418010_a_at | 4953.20  | 0.000244 | P | 2503.10  | 0.000244 | P | -2450.10  | -2.00 | 0.000052 | Sh3glb1                          | SH3-domain GRB2-like B1 (endophilin)                                                                                           |
| 1418189_s_at | 908.50   | 0.001953 | P | 308.50   | 0.095215 | A | -600.00   | -2.00 | 0.000046 | Malat1                           | receptor (calcitonin) activity modifying protein 2                                                                             |
| 1418518_at   | 371.90   | 0.023926 | P | 124.90   | 0.246094 | A | -247.00   | -2.00 | 0.001077 | Furin                            | furin (paired basic amino acid cleaving enzyme)                                                                                |
| 1418709_at   | 4556.20  | 0.000244 | P | 2409.50  | 0.000244 | P | -2146.70  | -2.00 | 0.000068 | Cox7a1                           | cytochrome c oxidase, subunit VIIa 1                                                                                           |
| 1420623_x_at | 8448.00  | 0.005859 | P | 2689.40  | 0.002930 | P | -5758.60  | -2.00 | 0.002490 | EG666904 /// Hspa8 /// LOC621284 | heat shock protein 8                                                                                                           |
| 1420631_a_at | 370.40   | 0.000244 | P | 160.50   | 0.004150 | P | -209.90   | -2.00 | 0.001486 | Bicap                            | bladder cancer associated protein homolog (human)                                                                              |
| 1422257_s_at | 639.60   | 0.01416  | P | 346.40   | 0.008057 | P | -293.20   | -2.00 | 0.001832 | Cyp2b10                          | cytochrome P450, 2b10, phenobarbital inducible, type b                                                                         |
| 1422651_at   | 14468.90 | 0.000244 | P | 7474.50  | 0.000244 | P | -6994.40  | -2.00 | 0.001201 | Adipoq                           | adipocyte complement related protein                                                                                           |
| 1422732_at   | 934.80   | 0.000244 | P | 483.20   | 0.010742 | P | -451.60   | -2.00 | 0.000114 | Poldip2                          | RIKEN cDNA 1300003F06 gene                                                                                                     |
| 1423109_s_at | 2312.10  | 0.000732 | P | 1103.60  | 0.000244 | P | -1208.50  | -2.00 | 0.000114 | Slc25a20                         | RIKEN cDNA 1110007F09 gene                                                                                                     |
| 1423134_at   | 517.30   | 0.000244 | P | 177.00   | 0.149658 | A | -340.30   | -2.00 | 0.001651 | BC003324                         | cDNA sequence BC003324                                                                                                         |
| 1423439_at   | 4838.70  | 0.000732 | P | 2049.60  | 0.000244 | P | -2789.10  | -2.00 | 0.000060 | Pck1                             | phosphoenolpyruvate carboxykinase 1, cytosolic                                                                                 |
| 1423737_at   | 7017.60  | 0.000244 | P | 3407.80  | 0.000244 | P | -3609.80  | -2.00 | 0.000241 | Ndufs3                           | NADH dehydrogenase (ubiquinone) Fe-S protein 3                                                                                 |
| 1424171_a_at | 1194.20  | 0.001221 | P | 541.80   | 0.005859 | P | -652.40   | -2.00 | 0.002490 | Hagh                             | hydroxyacyl glutathione hydrolase                                                                                              |
| 1424213_at   | 262.40   | 0.023926 | P | 124.80   | 0.171387 | A | -137.60   | -2.00 | 0.004073 | Ubiad1                           | RIKEN cDNA 1200002M06 gene                                                                                                     |
| 1424357_at   | 1257.30  | 0.000732 | P | 678.70   | 0.000732 | P | -578.60   | -2.00 | 0.002032 | Tmem45b                          | cDNA sequence BC018222                                                                                                         |
| 1425021_a_at | 1145.00  | 0.001221 | P | 494.40   | 0.000244 | P | -650.60   | -2.00 | 0.000214 | Pex16                            | peroxisome biogenesis factor 16                                                                                                |
| 1425332_at   | 445.60   | 0.00415  | P | 308.90   | 0.004150 | P | -136.70   | -2.00 | 0.001486 | Zfp106                           | zinc finger protein 106                                                                                                        |
| 1427052_at   | 3886.70  | 0.000244 | P | 1963.00  | 0.000244 | P | -1923.70  | -2.00 | 0.000020 | Acacb                            | acetyl-Coenzyme A carboxylase beta DNA segment, Chr 18, ERATO Doi 240, expressed                                               |
| 1428146_s_at | 11746.40 | 0.000244 | P | 7229.00  | 0.000244 | P | -4517.40  | -2.00 | 0.000023 | Acaa2                            | RIKEN cDNA 2610003B19 gene                                                                                                     |
| 1428160_at   | 970.80   | 0.000244 | P | 666.20   | 0.000244 | P | -304.60   | -2.00 | 0.000189 | Ndufab1                          | RIKEN cDNA 0610009I16 gene                                                                                                     |
| 1428181_at   | 14424.70 | 0.000244 | P | 8928.80  | 0.000244 | P | -5495.90  | -2.00 | 0.000020 | Etfb                             | RIKEN cDNA 0610009I16 gene                                                                                                     |
| 1428955_x_at | 363.30   | 0.00293  | P | 159.20   | 0.023926 | P | -204.10   | -2.00 | 0.004073 | Slc9a3r2                         | solute carrier family 9 (sodium/hydrogen exchanger), isoform 3 regulator 2                                                     |
| 1430326_s_at | 7059.90  | 0.000732 | P | 4116.80  | 0.000244 | P | -2943.10  | -2.00 | 0.000060 | Uqcrcq                           | ubiquinol-cytochrome c reductase binding protein                                                                               |
| 1431429_a_at | 2497.90  | 0.000244 | P | 1164.90  | 0.000244 | P | -1333.00  | -2.00 | 0.000052 | Arl4a                            | ADP-ribosylation-like 4                                                                                                        |
| 1431609_a_at | 621.90   | 0.000244 | P | 331.60   | 0.000244 | P | -290.30   | -2.00 | 0.000618 | Acp5                             | acid phosphatase 5, tartrate resistant                                                                                         |
| 1432016_a_at | 10481.80 | 0.000244 | P | 5847.60  | 0.000244 | P | -4634.20  | -2.00 | 0.000020 | ldh3a                            | isocitrate dehydrogenase 3 (NAD+) alpha                                                                                        |

|              |          |          |   |          |          |   |           |       |          |                                                                                                                                                             |                                                                                                                                                                                                                                                                       |
|--------------|----------|----------|---|----------|----------|---|-----------|-------|----------|-------------------------------------------------------------------------------------------------------------------------------------------------------------|-----------------------------------------------------------------------------------------------------------------------------------------------------------------------------------------------------------------------------------------------------------------------|
| 1433493_at   | 563.80   | 0.000244 | P | 299.60   | 0.008057 | P | -264.20   | -2.00 | 0.001077 | 5730472N09<br>Rik                                                                                                                                           | RIKEN cDNA 5730472N09 gene                                                                                                                                                                                                                                            |
| 1433991_x_at | 5663.80  | 0.005859 | P | 2924.50  | 0.010742 | P | -2739.30  | -2.00 | 0.000167 | Dbi                                                                                                                                                         | diazepam binding inhibitor                                                                                                                                                                                                                                            |
| 1434930_at   | 454.50   | 0.01416  | P | 247.10   | 0.014160 | P | -207.40   | -2.00 | 0.002490 | Tpcn1                                                                                                                                                       | ESTs. Moderately similar to JC7240 two-pore calcium channel protein - rat [R.norvegicus]                                                                                                                                                                              |
| 1436803_a_at | 12382.30 | 0.000244 | P | 4714.80  | 0.000244 | P | -7667.50  | -2.00 | 0.000020 | Ndufb9                                                                                                                                                      | NADH dehydrogenase (ubiquinone) 1 beta subcomplex, 9                                                                                                                                                                                                                  |
| 1438403_s_at | 1583.70  | 0.001221 | P | 774.40   | 0.005859 | P | -809.30   | -2.00 | 0.000307 | ---                                                                                                                                                         | receptor (calcitonin) activity modifying protein 2                                                                                                                                                                                                                    |
| 1439148_a_at | 1347.60  | 0.000244 | P | 657.20   | 0.000244 | P | -690.40   | -2.00 | 0.000966 | Pfkf                                                                                                                                                        | RIKEN cDNA 1110002H15 gene<br>phosphofructokinase, liver, B-type                                                                                                                                                                                                      |
| 1439435_x_at | 823.60   | 0.008057 | P | 391.40   | 0.023926 | P | -432.20   | -2.00 | 0.000346 | Pgk1                                                                                                                                                        | phosphoglycerate kinase 1                                                                                                                                                                                                                                             |
| 1439443_x_at | 12604.50 | 0.000244 | P | 5929.10  | 0.000244 | P | -6675.40  | -2.00 | 0.000023 | Tkt                                                                                                                                                         | transketolase                                                                                                                                                                                                                                                         |
| 1448136_at   | 402.80   | 0.008057 | P | 137.70   | 0.171387 | A | -265.10   | -2.00 | 0.000189 | Enpp2                                                                                                                                                       | ectonucleotide pyrophosphatase/phosphodiesterase 2                                                                                                                                                                                                                    |
| 1448331_at   | 3995.40  | 0.000244 | P | 1833.20  | 0.000244 | P | -2162.20  | -2.00 | 0.000101 | Ndufb7                                                                                                                                                      | RIKEN cDNA 1110002H15 gene                                                                                                                                                                                                                                            |
| 1448756_at   | 349.70   | 0.000244 | P | 219.40   | 0.095215 | A | -130.30   | -2.00 | 0.002490 | S100a9                                                                                                                                                      | S100 calcium binding protein A9 (calgranulin B)                                                                                                                                                                                                                       |
| 1448842_at   | 10009.40 | 0.000244 | P | 5262.00  | 0.000244 | P | -4747.40  | -2.00 | 0.000020 | Cdo1                                                                                                                                                        | cysteine dioxygenase 1, cytosolic                                                                                                                                                                                                                                     |
| 1449000_at   | 2975.30  | 0.000244 | P | 1317.10  | 0.000244 | P | -1658.20  | -2.00 | 0.000089 | D10Jhu81e                                                                                                                                                   | DNA segment, Chr 10, Johns Hopkins University 81 expressed                                                                                                                                                                                                            |
| 1449322_at   | 1341.10  | 0.000732 | P | 731.50   | 0.000244 | P | -609.60   | -2.00 | 0.000089 | EG269859 ///<br>EG667723 ///<br>LOC433406<br>///<br>LOC546482<br>///<br>LOC627166<br>///<br>LOC627200<br>///<br>LOC669215<br>///<br>LOC673579<br>/// Ptp4a1 | protein tyrosine phosphatase 4a1                                                                                                                                                                                                                                      |
| 1450534_x_at | 376.70   | 0.046143 | P | 131.40   | 0.246094 | A | -245.30   | -2.00 | 0.000438 | H2-K1                                                                                                                                                       | MHC (A.CA/J(H-2K-f) class I antigen                                                                                                                                                                                                                                   |
| 1451263_a_at | 5125.20  | 0.000732 | P | 1540.30  | 0.014160 | P | -3584.90  | -2.00 | 0.000020 | Fabp4                                                                                                                                                       | fatty acid binding protein 4, adipocyte                                                                                                                                                                                                                               |
| 1451274_at   | 4500.90  | 0.000244 | P | 2369.60  | 0.000244 | P | -2131.30  | -2.00 | 0.000020 | Ogdh                                                                                                                                                        | oxoglutarate dehydrogenase (lipoamide)                                                                                                                                                                                                                                |
| 1451415_at   | 1051.00  | 0.000732 | P | 586.10   | 0.000732 | P | -464.90   | -2.00 | 0.000273 | 1810011O10<br>Rik                                                                                                                                           | RIKEN cDNA 1810011O10 gene                                                                                                                                                                                                                                            |
| 1452071_at   | 1387.80  | 0.000732 | P | 595.80   | 0.001953 | P | -792.00   | -2.00 | 0.000214 | Slc4a4                                                                                                                                                      | Mus musculus, clone IMAGE:4222597, mRNA<br>Mus musculus adult male olfactory brain cDNA,<br>RIKEN full-length enriched library,<br>clone:6430549I20 product:hypothetical WWF<br>domain/Zinc finger C-x8-C-x5-C-x3-H type<br>containing protein, full insert sequence. |
| 1452160_at   | 362.30   | 0.01416  | P | 117.20   | 0.219482 | A | -245.10   | -2.00 | 0.003355 | Tiparp                                                                                                                                                      |                                                                                                                                                                                                                                                                       |
| 1454621_s_at | 671.30   | 0.000244 | P | 329.20   | 0.030273 | P | -342.10   | -2.00 | 0.000020 | 5730472N09<br>Rik                                                                                                                                           | RIKEN cDNA 5730472N09 gene                                                                                                                                                                                                                                            |
| 1455126_x_at | 9877.80  | 0.001221 | P | 4543.30  | 0.000732 | P | -5334.50  | -2.00 | 0.000060 | Rik                                                                                                                                                         | RIKEN cDNA 2310028O11 gene                                                                                                                                                                                                                                            |
| 1455976_x_at | 5249.40  | 0.001953 | P | 4846.70  | 0.010742 | P | -402.70   | -2.00 | 0.000101 | Dbi                                                                                                                                                         | diazepam binding inhibitor                                                                                                                                                                                                                                            |
| 1456588_x_at | 26288.00 | 0.000244 | P | 15017.00 | 0.000244 | P | -11271.00 | -2.00 | 0.000020 | Cox5b                                                                                                                                                       | cytochrome c oxidase, subunit Vb                                                                                                                                                                                                                                      |
| 1415904_at   | 40467.60 | 0.000244 | P | 18551.10 | 0.000244 | P | -21916.50 | -2.14 | 0.000492 | Lpl                                                                                                                                                         | lipoprotein lipase                                                                                                                                                                                                                                                    |
| 1415933_a_at | 5472.20  | 0.000244 | P | 2511.10  | 0.000732 | P | -2961.10  | -2.14 | 0.000114 | Cox5a                                                                                                                                                       | cytochrome c oxidase, subunit Va                                                                                                                                                                                                                                      |
| 1415975_at   | 584.80   | 0.001221 | P | 310.60   | 0.080566 | A | -274.20   | -2.14 | 0.003355 | Carhsp1                                                                                                                                                     | DNA segment, Chr 16, ERATO Doi 465,<br>expressed                                                                                                                                                                                                                      |
| 1416021_a_at | 496.20   | 0.005859 | P | 249.20   | 0.037598 | P | -247.00   | -2.14 | 0.001651 | Fabp5 ///<br>LOC628298<br>///<br>LOC669559                                                                                                                  | fatty acid binding protein 5, epidermal                                                                                                                                                                                                                               |
| 1416023_at   | 4388.50  | 0.000244 | P | 1889.50  | 0.000244 | P | -2499.00  | -2.14 | 0.000020 | Fabp3                                                                                                                                                       | fatty acid binding protein 3, muscle and heart                                                                                                                                                                                                                        |
| 1416302_at   | 331.10   | 0.008057 | P | 127.00   | 0.246094 | A | -204.10   | -2.14 | 0.003699 | Ebf1                                                                                                                                                        | early B-cell factor 1                                                                                                                                                                                                                                                 |
| 1416607_at   | 1777.90  | 0.000244 | P | 992.10   | 0.000244 | P | -785.80   | -2.14 | 0.000346 | 4931406C07<br>Rik                                                                                                                                           | RIKEN cDNA 4931406C07 gene                                                                                                                                                                                                                                            |
| 1417066_at   | 11037.60 | 0.000244 | P | 5165.00  | 0.000244 | P | -5872.60  | -2.14 | 0.000020 | Cabc1                                                                                                                                                       | RIKEN cDNA 4632432J16 gene                                                                                                                                                                                                                                            |
| 1417404_at   | 3425.50  | 0.000244 | P | 1445.30  | 0.000244 | P | -1980.20  | -2.14 | 0.000114 | Elovl6                                                                                                                                                      | long chain fatty acyl elongase                                                                                                                                                                                                                                        |
| 1417956_at   | 22329.30 | 0.000244 | P | 10148.40 | 0.000244 | P | -12180.90 | -2.14 | 0.000020 | Cidea                                                                                                                                                       | cell death-inducing DNA fragmentation factor,<br>alpha subunit-like effector A                                                                                                                                                                                        |
| 1418094_s_at | 458.10   | 0.000244 | P | 219.20   | 0.067627 | A | -238.90   | -2.14 | 0.000189 | Car4                                                                                                                                                        | carbonic anhydrase 4                                                                                                                                                                                                                                                  |
| 1418396_at   | 220.00   | 0.00415  | P | 72.50    | 0.500000 | A | -147.50   | -2.14 | 0.001832 | Gpsm3                                                                                                                                                       | expressed sequence AA960287                                                                                                                                                                                                                                           |
| 1420965_a_at | 1713.30  | 0.000732 | P | 583.20   | 0.005859 | P | -1130.10  | -2.14 | 0.000023 | Enc1                                                                                                                                                        | ectodermal-neural cortex 1                                                                                                                                                                                                                                            |
| 1422678_at   | 12137.20 | 0.001221 | P | 4649.80  | 0.000244 | P | -7487.40  | -2.14 | 0.002753 | Dgat2                                                                                                                                                       | diacylglycerol O-acyltransferase 2                                                                                                                                                                                                                                    |
| 1422852_at   | 2104.70  | 0.000244 | P | 782.70   | 0.004150 | P | -1322.00  | -2.14 | 0.000052 | Cib2                                                                                                                                                        | kinase interacting protein 2                                                                                                                                                                                                                                          |
| 1422997_s_at | 488.00   | 0.000244 | P | 210.30   | 0.001953 | P | -277.70   | -2.14 | 0.002250 | Acot1 ///<br>Acot2                                                                                                                                          | mitochondrial acyl-CoA thioesterase 1                                                                                                                                                                                                                                 |
| 1423898_a_at | 1016.10  | 0.000244 | P | 394.60   | 0.004150 | P | -621.50   | -2.14 | 0.000307 | Trip12                                                                                                                                                      | gene trap locus 6                                                                                                                                                                                                                                                     |
| 1424182_at   | 1261.10  | 0.000732 | P | 522.00   | 0.000244 | P | -739.10   | -2.14 | 0.000130 | Acat1                                                                                                                                                       | acetyl-Coenzyme A acetyltransferase 1                                                                                                                                                                                                                                 |
| 1424745_at   | 535.20   | 0.000244 | P | 203.90   | 0.067627 | A | -331.30   | -2.14 | 0.000147 | Agxt2I2<br>6230410P16                                                                                                                                       | RIKEN cDNA 2900006B13 gene                                                                                                                                                                                                                                            |
| 1424994_at   | 198.10   | 0.023926 | P | 92.50    | 0.432373 | A | -105.60   | -2.14 | 0.004073 | Rik                                                                                                                                                         | RIKEN cDNA 6230410P16 gene                                                                                                                                                                                                                                            |
| 1425364_a_at | 1440.60  | 0.000244 | P | 851.70   | 0.000732 | P | -588.90   | -2.14 | 0.000052 | Slc3a2                                                                                                                                                      | solute carrier family 3 (activators of dibasic and neutral amino acid transport), member 2                                                                                                                                                                            |
| 1425809_at   | 822.60   | 0.001953 | P | 483.10   | 0.000244 | P | -339.50   | -2.14 | 0.000692 | Fabp4                                                                                                                                                       | Mus musculus, Similar to fatty acid binding protein 4, adipocyte, clone MGC:18548 IMAGE:3670866,<br>mRNA, complete cds                                                                                                                                                |
| 1426554_a_at | 1756.60  | 0.000732 | P | 490.60   | 0.000244 | P | -1266.00  | -2.14 | 0.000966 | EG668045 ///<br>LOC675179<br>/// Pgam1                                                                                                                      | phosphoglycerate mutase 1                                                                                                                                                                                                                                             |
| 1427153_at   | 1312.90  | 0.000732 | P | 665.30   | 0.000732 | P | -647.60   | -2.14 | 0.000114 | Bckdhh<br>2810474O19                                                                                                                                        | branched chain ketoacid dehydrogenase E1, beta polypeptide                                                                                                                                                                                                            |
| 1427334_s_at | 525.40   | 0.001953 | P | 255.00   | 0.080566 | A | -270.40   | -2.14 | 0.000214 | Rik                                                                                                                                                         | RIKEN cDNA 2810474O19 gene                                                                                                                                                                                                                                            |
| 1427552_a_at | 1094.20  | 0.000244 | P | 536.60   | 0.000244 | P | -557.60   | -2.14 | 0.000618 | Gstz1<br>2310061C15                                                                                                                                         | glutathione transferase zeta 1<br>(maleylacetoacetate isomerase)                                                                                                                                                                                                      |
| 1427921_s_at | 317.40   | 0.00293  | P | 155.10   | 0.129639 | A | -162.30   | -2.14 | 0.001832 | Rik                                                                                                                                                         | RIKEN cDNA 2310061C15 gene                                                                                                                                                                                                                                            |
| 1430483_a_at | 435.20   | 0.001953 | P | 256.50   | 0.037598 | P | -178.70   | -2.14 | 0.001077 | Tmem79                                                                                                                                                      | RIKEN cDNA 2310042N02 gene                                                                                                                                                                                                                                            |
| 1430827_a_at | 213.10   | 0.018555 | P | 32.40    | 0.601074 | A | -180.70   | -2.14 | 0.000692 | Ptk2                                                                                                                                                        | PTK2 protein tyrosine kinase 2                                                                                                                                                                                                                                        |
| 1434499_a_at | 6311.10  | 0.000244 | P | 2664.80  | 0.001221 | P | -3646.30  | -2.14 | 0.000101 | Ldhh                                                                                                                                                        | lactate dehydrogenase 2, B chain                                                                                                                                                                                                                                      |
| 1436934_s_at | 12268.40 | 0.000244 | P | 5759.80  | 0.000244 | P | -6508.60  | -2.14 | 0.000020 | Aco2                                                                                                                                                        | aconitase 2, mitochondrial                                                                                                                                                                                                                                            |
| 1438178_x_at | 1804.60  | 0.000732 | P | 738.80   | 0.000732 | P | -1065.80  | -2.14 | 0.000023 | Atad3a                                                                                                                                                      | TOB3                                                                                                                                                                                                                                                                  |
| 1448135_at   | 2593.80  | 0.000732 | P | 1247.50  | 0.014160 | P | -1346.30  | -2.14 | 0.000030 | Atf4                                                                                                                                                        | activating transcription factor 4                                                                                                                                                                                                                                     |



|              |          |          |   |         |          |   |          |       |          |                        |                                                                                            |
|--------------|----------|----------|---|---------|----------|---|----------|-------|----------|------------------------|--------------------------------------------------------------------------------------------|
| 1448448_a_at | 1849.30  | 0.001221 | P | 607.70  | 0.001221 | P | -1241.60 | -2.14 | 0.000130 | Chkb                   | choline kinase-like                                                                        |
| 1448688_at   | 966.40   | 0.000732 | P | 375.90  | 0.004150 | P | -590.50  | -2.14 | 0.000027 | Podxl                  | podocalyxin-like                                                                           |
| 1449130_at   | 574.50   | 0.005859 | P | 190.30  | 0.014160 | P | -384.20  | -2.14 | 0.000147 | Cd1d1                  | CD1d1 antigen                                                                              |
| 1450776_at   | 2197.80  | 0.000732 | P | 610.30  | 0.001953 | P | -1587.50 | -2.14 | 0.000035 | Agpat6                 | putative lysophosphatidic acid acyltransferase                                             |
| 1451015_at   | 9126.70  | 0.000244 | P | 4410.00 | 0.000244 | P | -4716.70 | -2.14 | 0.000020 | Tkt                    | transketolase                                                                              |
| 1452260_at   | 1934.10  | 0.000244 | P | 1240.70 | 0.000244 | P | -693.40  | -2.14 | 0.000189 | Cidec                  | fat specific gene 27                                                                       |
| 1452608_at   | 361.00   | 0.01416  | P | 173.00  | 0.219482 | A | -188.00  | -2.14 | 0.002250 | Mycbp                  | c-myc binding protein                                                                      |
| 1453571_at   | 916.50   | 0.00293  | P | 417.80  | 0.018555 | P | -498.70  | -2.14 | 0.001077 | Depdc6                 | mitochondrial ribosomal protein L19                                                        |
| 1454738_x_at | 1150.70  | 0.000732 | P | 593.00  | 0.000732 | P | -557.70  | -2.14 | 0.000966 | Pex6                   | peroxisomal biogenesis factor 6                                                            |
| 1455713_x_at | 2164.70  | 0.000732 | P | 1377.50 | 0.000732 | P | -787.20  | -2.14 | 0.000966 | Phb2                   | B-cell receptor-associated protein 37                                                      |
| 1455800_x_at | 1596.70  | 0.000244 | P | 1060.20 | 0.000244 | P | -536.50  | -2.14 | 0.000167 | Samm50                 | RIKEN cDNA 111003L07 gene                                                                  |
| 1456031_at   | 172.80   | 0.001953 | P | 61.40   | 0.423828 | A | -111.40  | -2.14 | 0.000692 | Tubb2c                 | RIKEN cDNA 4930542G03 gene                                                                 |
| 1456424_s_at | 633.70   | 0.010742 | P | 383.20  | 0.129639 | A | -250.50  | -2.14 | 0.000389 | Pltp                   | phospholipid transfer protein                                                              |
| 1456676_a_at | 402.10   | 0.005859 | P | 268.30  | 0.067627 | A | -133.80  | -2.14 | 0.002250 | Ptkfb3                 | RIKEN cDNA E330010H22 gene                                                                 |
| 1416041_at   | 2105.30  | 0.000732 | P | 853.90  | 0.001953 | P | -1251.40 | -2.30 | 0.000089 | Sgk                    | serum/glucocorticoid regulated kinase                                                      |
| 1416530_a_at | 1204.20  | 0.000244 | P | 788.00  | 0.001953 | P | -416.20  | -2.30 | 0.000046 | Pnp                    | purine-nucleoside phosphorylase                                                            |
| 1416793_at   | 1621.00  | 0.001221 | P | 742.50  | 0.000732 | P | -878.50  | -2.30 | 0.000389 | Arl6ip2                | ADP-ribosylation-like factor 6 interacting protein 2                                       |
| 1417290_at   | 851.40   | 0.000732 | P | 264.10  | 0.056152 | M | -587.30  | -2.30 | 0.000030 | Lrg1                   | leucine-rich alpha-2-glycoprotein                                                          |
| 1417379_at   | 3107.70  | 0.000244 | P | 1093.50 | 0.000244 | P | -2014.20 | -2.30 | 0.000618 | Iggap1                 | IQ motif containing GTPase activating protein 1                                            |
| 1417429_at   | 4808.50  | 0.000244 | P | 1637.90 | 0.000244 | P | -3170.60 | -2.30 | 0.000020 | Fmo1                   | flavin containing monooxygenase 1                                                          |
| 1417623_at   | 271.50   | 0.00415  | P | 129.70  | 0.107178 | A | -141.80  | -2.30 | 0.001832 | Slc12a2                | solute carrier family 12, member 2                                                         |
| 1418084_at   | 832.50   | 0.000244 | P | 449.10  | 0.000732 | P | -383.40  | -2.30 | 0.000241 | Nrp1                   | neuropilin                                                                                 |
| 1418099_at   | 342.40   | 0.001953 | P | 154.50  | 0.149658 | A | -187.90  | -2.30 | 0.004481 | Tnfrsf1b               | tumor necrosis factor receptor superfamily, member 1b                                      |
| 1418279_a_at | 1075.70  | 0.000244 | P | 391.30  | 0.001221 | P | -684.40  | -2.30 | 0.000692 | Akap1                  | A kinase (PRKA) anchor protein 1                                                           |
| 1418325_at   | 703.00   | 0.010742 | P | 305.80  | 0.018555 | P | -397.20  | -2.30 | 0.000966 | Seps2                  | selenophosphate synthetase 2                                                               |
| 1418328_at   | 3832.20  | 0.001953 | P | 1458.20 | 0.004150 | P | -2374.00 | -2.30 | 0.000130 | Cpt1b                  | carnitine palmitoyltransferase 1, muscle                                                   |
| 1421307_at   | 364.00   | 0.000732 | P | 213.10  | 0.111572 | A | -150.90  | -2.30 | 0.000040 | Car13                  | carbonic anhydrase 13                                                                      |
| 1421571_a_at | 2660.80  | 0.000732 | P | 1390.80 | 0.000244 | P | -1270.00 | -2.30 | 0.001336 | Ly6c                   | lymphocyte antigen 6 complex, locus C                                                      |
| 1422526_at   | 3428.90  | 0.000244 | P | 1619.70 | 0.000732 | P | -1809.20 | -2.30 | 0.000020 | Acs1                   | fatty acid Coenzyme A ligase, long chain 2                                                 |
| 1423405_at   | 666.60   | 0.001953 | P | 279.20  | 0.005859 | P | -387.40  | -2.30 | 0.000078 | Timp4                  | tissue inhibitor of metalloproteinase 4                                                    |
| 1423954_at   | 4438.60  | 0.000244 | P | 2070.30 | 0.000244 | P | -2368.30 | -2.30 | 0.000020 | C3                     | complement component 3                                                                     |
| 1425834_a_at | 549.00   | 0.000244 | P | 245.00  | 0.023926 | P | -304.00  | -2.30 | 0.000147 | Gpam                   | glycerol-3-phosphate acyltransferase, mitochondrial                                        |
| 1426676_s_at | 286.50   | 0.010742 | P | 89.60   | 0.303711 | A | -196.90  | -2.30 | 0.001486 | Tomm70a                | DNA segment, Chr 16, Indiana University Medical 22, expressed                              |
| 1427459_at   | 300.40   | 0.030273 | P | 127.00  | 0.398926 | A | -173.40  | -2.30 | 0.000020 | Cpn2                   | RIKEN cDNA 1300018K11 gene                                                                 |
| 1427844_a_at | 898.90   | 0.000244 | P | 506.80  | 0.001953 | P | -392.10  | -2.30 | 0.001077 | Cebpb                  | CCAAT/enhancer binding protein (C/EBP), beta                                               |
| 1428082_at   | 2145.80  | 0.000732 | P | 970.60  | 0.001221 | P | -1175.20 | -2.30 | 0.000030 | Acs15                  | fatty acid Coenzyme A ligase, long chain 5                                                 |
| 1428106_at   | 1328.20  | 0.000244 | P | 535.90  | 0.000732 | P | -792.30  | -2.30 | 0.000101 | ik                     | RIKEN cDNA 1300001I01 gene                                                                 |
| 1433485_x_at | 250.80   | 0.030273 | P | 142.70  | 0.567627 | A | -108.10  | -2.30 | 0.000966 | Gpr56                  | G protein-coupled receptor 56                                                              |
| 1435737_a_at | 357.90   | 0.001953 | P | 108.70  | 0.129639 | A | -249.20  | -2.30 | 0.003355 | Nde1                   | nuclear distribution gene E homolog (Aspergillus)                                          |
| 1437343_x_at | 2425.80  | 0.000244 | P | 1020.70 | 0.000732 | P | -1405.10 | -2.30 | 0.000020 | Atad3a                 | TOB3                                                                                       |
| 1448881_at   | 2453.70  | 0.000244 | P | 1166.50 | 0.000244 | P | -1287.20 | -2.30 | 0.000020 | Hp                     | haptoglobin                                                                                |
| 1448890_at   | 2318.50  | 0.000244 | P | 882.50  | 0.000244 | P | -1436.00 | -2.30 | 0.000020 | Klf2                   | Kruppel-like factor 2 (lung)                                                               |
| 1449714_at   | 2047.20  | 0.000732 | P | 642.20  | 0.00032  | P | -1405.00 | -2.30 | 0.000046 | Rik                    | RIKEN cDNA 5730472N09 gene                                                                 |
| 1451200_at   | 714.20   | 0.000732 | P | 388.20  | 0.008057 | P | -326.00  | -2.30 | 0.001077 | Kif1b                  | kinesin family member 1B                                                                   |
| 1451240_a_at | 448.40   | 0.00415  | P | 140.30  | 0.030273 | P | -308.10  | -2.30 | 0.001832 | Glo1                   | RIKEN cDNA 1110008E19 gene                                                                 |
| 1451716_at   | 654.20   | 0.000732 | P | 302.30  | 0.056152 | M | -351.90  | -2.30 | 0.000020 | Mafb                   | v-maf musculoaponeurotic fibrosarcoma oncogene family, protein B (avian)                   |
| 1451959_a_at | 540.60   | 0.018555 | P | 164.70  | 0.334473 | A | -375.90  | -2.30 | 0.000346 | Vegfa                  | vascular endothelial growth factor A                                                       |
| 1452597_at   | 1053.50  | 0.001953 | P | 513.40  | 0.004150 | P | -540.10  | -2.30 | 0.000167 | Rik                    | RIKEN cDNA 2310061C15 gene                                                                 |
| 1455640_a_at | 1005.50  | 0.001221 | P | 732.40  | 0.010742 | P | -273.10  | -2.30 | 0.001201 | Txn2                   | thioredoxin 2                                                                              |
| 1456071_a_at | 9547.20  | 0.000244 | P | 4155.40 | 0.000732 | P | -5391.80 | -2.30 | 0.000020 | Cycc /// LOC670717 /// |                                                                                            |
| 1460643_at   | 307.40   | 0.030273 | P | 131.40  | 0.432373 | A | -176.00  | -2.30 | 0.000692 | Eil                    | cytochrome c, somatic                                                                      |
| 1415802_at   | 1459.40  | 0.001953 | P | 411.80  | 0.002930 | P | -1047.60 | -2.46 | 0.000023 | Slc16a1                | eleven-nineteen lysine-rich leukemia gene                                                  |
| 1416417_a_at | 6207.20  | 0.000244 | P | 2929.50 | 0.000244 | P | -3277.70 | -2.46 | 0.000020 | Ndufb7                 | solute carrier family 16 (monocarboxylic acid transporters), member 1                      |
| 1416442_at   | 608.50   | 0.000244 | P | 281.90  | 0.000244 | P | -326.60  | -2.46 | 0.000189 | ler2                   | RIKEN cDNA 1110002H15 gene                                                                 |
| 1416811_s_at | 1654.00  | 0.000732 | P | 495.90  | 0.000244 | P | -1158.10 | -2.46 | 0.000089 | Ctla2a /// Ctla2b      | immediate early response 2                                                                 |
| 1417169_at   | 497.70   | 0.001953 | P | 209.60  | 0.014160 | P | -288.10  | -2.46 | 0.002753 | Usp2                   | cytotoxic T lymphocyte-associated protein 2 beta                                           |
| 1417394_at   | 628.00   | 0.000244 | P | 291.70  | 0.000732 | P | -336.30  | -2.46 | 0.002250 | Klf4                   | RIKEN cDNA B930035K21 gene                                                                 |
| 1417765_a_at | 1075.00  | 0.000244 | P | 483.00  | 0.004150 | P | -592.00  | -2.46 | 0.000027 | Amy1                   | Kruppel-like factor 4 (gut)                                                                |
| 1417869_s_at | 858.20   | 0.001953 | P | 384.70  | 0.008057 | P | -473.50  | -2.46 | 0.000492 | Ctsz                   | amylase 1, salivary                                                                        |
| 1417963_at   | 539.10   | 0.000732 | P | 295.60  | 0.037598 | P | -243.50  | -2.46 | 0.000068 | Pltp                   | cathepsin Z                                                                                |
| 1418003_at   | 4468.80  | 0.000244 | P | 2633.60 | 0.000732 | P | -1835.20 | -2.46 | 0.000692 | Rik                    | phospholipid transfer protein                                                              |
| 1418520_at   | 332.80   | 0.000244 | P | 146.60  | 0.004150 | P | -186.20  | -2.46 | 0.001077 | Tgolin1                | 1190002H23                                                                                 |
| 1419256_at   | 1602.10  | 0.000244 | P | 873.70  | 0.000732 | P | -728.40  | -2.46 | 0.001077 | Spnb2                  | RIKEN cDNA 1190002H23 gene                                                                 |
| 1423251_at   | 636.00   | 0.00293  | P | 185.50  | 0.046143 | P | -450.50  | -2.46 | 0.003355 | Luc712                 | trans-golgi network protein 1                                                              |
| 1423269_a_at | 203.30   | 0.018555 | P | 83.40   | 0.533936 | A | -119.90  | -2.46 | 0.000189 | Nedd4l                 | beta-spectrin 2, non-erythrocytic                                                          |
| 1423889_at   | 794.70   | 0.000732 | P | 405.90  | 0.037598 | P | -388.80  | -2.46 | 0.002250 | EG434402               | CGI-74-like SR-rich                                                                        |
| 1423911_at   | 2285.60  | 0.000244 | P | 772.90  | 0.000244 | P | -1512.70 | -2.46 | 0.000020 | Ppp2r5a                | neural precursor cell expressed, developmentally down-regulated gene 4-like                |
| 1423989_at   | 635.30   | 0.00293  | P | 229.10  | 0.171387 | A | -406.20  | -2.46 | 0.000273 | Rik                    | Mus musculus, clone MGC:5739                                                               |
| 1425645_s_at | 864.80   | 0.001953 | P | 362.70  | 0.004150 | P | -502.10  | -2.46 | 0.000438 | Cyp2b10                | IMAGE:3481870, mRNA, complete cds                                                          |
| 1426644_at   | 1304.20  | 0.00415  | P | 403.10  | 0.001953 | P | -901.10  | -2.46 | 0.000692 | Tbc1d20                | hypothetical protein MGC38798                                                              |
| 1428333_at   | 300.40   | 0.01416  | P | 126.60  | 0.274170 | A | -173.80  | -2.46 | 0.000389 | Rik                    | 2210010N04                                                                                 |
| 1428580_at   | 549.20   | 0.000244 | P | 154.80  | 0.023926 | P | -394.40  | -2.46 | 0.000030 | Blvra                  | RIKEN cDNA 2210010N04 gene                                                                 |
| 1428882_at   | 523.00   | 0.000244 | P | 168.40  | 0.056152 | M | -354.60  | -2.46 | 0.000046 | Wipi2                  | cytochrome P450, 2b20                                                                      |
| 1431028_a_at | 1513.70  | 0.000244 | P | 916.10  | 0.002930 | P | -597.60  | -2.46 | 0.000040 | Pank1                  | RIKEN cDNA 2810442O16 gene                                                                 |
| 1435602_at   | 6129.90  | 0.000244 | P | 2047.30 | 0.000244 | P | -4082.60 | -2.46 | 0.000052 | ---                    | 2900062L11                                                                                 |
| 1436301_at   | 269.80   | 0.005859 | P | 77.80   | 0.334473 | A | -192.00  | -2.46 | 0.000774 | Ripk5                  | RIKEN cDNA 6530401D17 gene                                                                 |
| 1436910_at   | 316.00   | 0.037598 | P | 144.20  | 0.500000 | A | -171.80  | -2.46 | 0.004481 | Rasal2                 | biliverdin reductase A                                                                     |
| 1437992_x_at | 2083.90  | 0.000244 | P | 1007.20 | 0.000244 | P | -1076.70 | -2.46 | 0.000027 | Gja1                   | RIKEN cDNA 2510001110 gene                                                                 |
| 1437997_x_at | 457.90   | 0.023926 | P | 182.40  | 0.194580 | A | -275.50  | -2.46 | 0.000552 | Mrpl48                 | RIKEN cDNA 2900062L11 gene                                                                 |
| 1438708_x_at | 1069.80  | 0.000732 | P | 487.10  | 0.000244 | P | -582.70  | -2.46 | 0.000060 | Ywhab                  | RIKEN cDNA 4330066M24 gene                                                                 |
| 1443969_at   | 396.60   | 0.018555 | P | 95.50   | 0.334473 | A | -301.10  | -2.46 | 0.000035 | Irs2                   | panthothenate kinase 1                                                                     |
| 1448491_at   | 16686.30 | 0.000244 | P | 6730.30 | 0.000244 | P | -9956.00 | -2.46 | 0.000020 | Ech1                   | selenophosphate synthetase 2                                                               |
|              |          |          |   |         |          |   |          |       |          |                        | RIKEN cDNA C430014H23 gene                                                                 |
|              |          |          |   |         |          |   |          |       |          |                        | RIKEN cDNA A330066M24 gene                                                                 |
|              |          |          |   |         |          |   |          |       |          |                        | gap junction membrane channel protein alpha 1                                              |
|              |          |          |   |         |          |   |          |       |          |                        | DNA segment, Chr 4, ERATO Doi 786, expressed                                               |
|              |          |          |   |         |          |   |          |       |          |                        | tyrosine 3-monooxygenase/tryptophan 5-monooxygenase activation protein, beta polypeptide   |
|              |          |          |   |         |          |   |          |       |          |                        | ESTs, Highly similar to IRS2_MOUSE INSULIN RECEPTOR SUBSTRATE-2 (IRS-2) (4PS) [M.musculus] |
|              |          |          |   |         |          |   |          |       |          |                        | enoyl coenzyme A hydratase 1, peroxisomal                                                  |

|               |          |            |          |            |           |       |          |          |                                                                                                                                                                                                                  |
|---------------|----------|------------|----------|------------|-----------|-------|----------|----------|------------------------------------------------------------------------------------------------------------------------------------------------------------------------------------------------------------------|
| 1448700_at    | 3877.00  | 0.000732 P | 1267.40  | 0.000732 P | -2609.60  | -2.46 | 0.000060 | G0s2     | G0/G1 switch gene 2                                                                                                                                                                                              |
| 1449088_at    | 370.50   | 0.00293 P  | 104.10   | 0.432373 A | -266.40   | -2.46 | 0.000307 | Fbp2     | fructose biphosphatase 2                                                                                                                                                                                         |
| 1449408_at    | 323.40   | 0.018555 P | 143.90   | 0.144531 A | -179.50   | -2.46 | 0.003355 | Jam2     | junction cell adhesion molecule 2                                                                                                                                                                                |
| 1449638_at    | 435.00   | 0.037598 P | 134.00   | 0.334473 A | -301.00   | -2.46 | 0.003355 | ---      | ESTs. Weakly similar to enabled homolog (Drosophila) [Mus musculus] [M.musculus]                                                                                                                                 |
| 1449849_a_at  | 216.30   | 0.008057 P | 99.50    | 0.366211 A | -116.80   | -2.46 | 0.004073 | Fbxl6    | F-box and leucine-rich repeat protein 6                                                                                                                                                                          |
| 1449935_a_at  | 954.80   | 0.000732 P | 372.90   | 0.002244 P | -581.90   | -2.46 | 0.001201 | Dnaja3   | DnaJ (Hsp40) homolog, subfamily A, member 3                                                                                                                                                                      |
| 1450084_s_at  | 712.90   | 0.008057 P | 324.10   | 0.002930 P | -388.80   | -2.46 | 0.003699 | lnvs1abp | Nd1                                                                                                                                                                                                              |
| 1450391_a_at  | 2795.00  | 0.000244 P | 867.70   | 0.001221 P | -1927.30  | -2.46 | 0.000020 | Mgll     | monoglyceride lipase                                                                                                                                                                                             |
| 1450643_s_at  | 5822.80  | 0.000732 P | 2033.60  | 0.002244 P | -3789.20  | -2.46 | 0.000027 | Acs11    | fatty acid Coenzyme A ligase, long chain 2                                                                                                                                                                       |
| 1450667_a_at  | 11906.60 | 0.000244 P | 6187.50  | 0.000244 P | -5719.10  | -2.46 | 0.000020 | Cs       | citrate synthase                                                                                                                                                                                                 |
| 1451226_at    | 998.90   | 0.008057 P | 345.40   | 0.014160 P | -653.50   | -2.46 | 0.000346 | Pex6     | peroxisomal biogenesis factor 6                                                                                                                                                                                  |
| 1451371_at    | 1206.00  | 0.037598 P | 481.30   | 0.080566 A | -724.70   | -2.46 | 0.000774 | Mrap     | RIKEN cDNA 1110025G12 gene                                                                                                                                                                                       |
| 1453864_at    | 225.90   | 0.056152 M | 57.80    | 0.633789 A | -168.10   | -2.46 | 0.001832 | Rdh14    | RIKEN cDNA 3110030G19 gene                                                                                                                                                                                       |
| 1454987_a_at  | 289.20   | 0.005859 P | 119.10   | 0.334473 A | -170.10   | -2.46 | 0.001486 | H2-Ke6   | H2-K region expressed gene 6                                                                                                                                                                                     |
| 1457094_at    | 388.90   | 0.00415 P  | 107.30   | 0.095215 A | -281.60   | -2.46 | 0.004071 | She      | hypothetical protein 9430022A14                                                                                                                                                                                  |
| 1460239_at    | 904.60   | 0.000244 P | 311.80   | 0.001221 P | -592.80   | -2.46 | 0.000774 | Tspan13  | RIKEN cDNA 1100001I23 gene                                                                                                                                                                                       |
| 146086_at     | 453.60   | 0.001953 P | 131.10   | 0.111572 A | -322.50   | -2.64 | 0.000966 | Tpst2    | protein-tyrosine sulfotransferase 2                                                                                                                                                                              |
| 1461624_at    | 555.40   | 0.000244 P | 272.70   | 0.023926 P | -282.70   | -2.64 | 0.001201 | Mrpl28   | mitochondrial ribosomal protein L28                                                                                                                                                                              |
| 14617403_at   | 2662.90  | 0.000244 P | 949.20   | 0.001221 P | -1713.70  | -2.64 | 0.000068 | Elov6    | long chain fatty acyl elongase                                                                                                                                                                                   |
| 14617574_at   | 788.40   | 0.005859 P | 335.10   | 0.008057 P | -453.30   | -2.64 | 0.001201 | Cxcl12   | chemokine (C-X-C motif) ligand 12                                                                                                                                                                                |
| 14618197_at   | 30158.80 | 0.000244 P | 10319.00 | 0.000244 P | -19839.80 | -2.64 | 0.000020 | Ucp1     | uncoupling protein 1, mitochondrial                                                                                                                                                                              |
| 14618701_at   | 638.70   | 0.001953 P | 248.00   | 0.149658 A | -390.70   | -2.64 | 0.000618 | Comt     | RIKEN cDNA D330014B15 gene                                                                                                                                                                                       |
| 14619552_at   | 347.90   | 0.00415 P  | 173.60   | 0.303711 A | -174.30   | -2.64 | 0.004481 | Echdc1   | DNA segment, Chr 10, ERATO Doi 667, expressed                                                                                                                                                                    |
| 14619706_a_at | 1910.00  | 0.000244 P | 569.10   | 0.002930 P | -1340.90  | -2.64 | 0.000023 | Akap12   | A kinase (PRKA) anchor protein (gravin) 12                                                                                                                                                                       |
| 14621129_a_at | 811.80   | 0.000244 P | 211.90   | 0.004150 P | -599.90   | -2.64 | 0.000078 | Atp2a3   | ATPase, Ca++ transporting, ubiquitous                                                                                                                                                                            |
| 14622820_at   | 3868.30  | 0.000244 P | 2188.20  | 0.000244 P | -1680.10  | -2.64 | 0.000020 | Lipe     | lipase, hormone sensitive                                                                                                                                                                                        |
| 14623166_at   | 8345.90  | 0.000244 P | 3341.90  | 0.000244 P | -5004.00  | -2.64 | 0.000101 | Cd36     | CD36 antigen                                                                                                                                                                                                     |
| 14623883_at   | 10732.00 | 0.000244 P | 3543.10  | 0.000244 P | -7188.90  | -2.64 | 0.000020 | Acs11    | Mus musculus, clone MGC:7898                                                                                                                                                                                     |
| 14624716_at   | 491.80   | 0.005859 P | 174.00   | 0.149658 A | -317.80   | -2.64 | 0.001336 | Retsat   | IMAGE:3582717, mRNA, complete cds                                                                                                                                                                                |
| 14624790_at   | 780.50   | 0.008057 P | 280.60   | 0.005859 P | -499.90   | -2.64 | 0.004073 | Slc25a42 | trans-golgi network protein 1                                                                                                                                                                                    |
| 14626336_at   | 272.20   | 0.008057 P | 79.10    | 0.398926 A | -193.10   | -2.64 | 0.000865 | Cacng7   | Mus musculus, clone IMAGE:4972835, mRNA                                                                                                                                                                          |
| 14626785_s_at | 4604.20  | 0.000244 P | 1795.60  | 0.000244 P | -2808.60  | -2.64 | 0.000020 | Mgll     | calcium channel, voltage-dependent, gamma subunit 7                                                                                                                                                              |
| 14634276_x_at | 339.10   | 0.005859 P | 73.80    | 0.149658 A | -265.30   | -2.64 | 0.000052 | BC004004 | monoglyceride lipase                                                                                                                                                                                             |
| 14634329_s_at | 1966.80  | 0.000244 P | 597.50   | 0.000244 P | -1369.30  | -2.64 | 0.000020 | Adipor2  | cDNA sequence BC004004                                                                                                                                                                                           |
| 14636783_x_at | 2431.20  | 0.000244 P | 1089.20  | 0.000244 P | -1342.00  | -2.64 | 0.000020 | Ywhab    | RIKEN cDNA 1110001114 gene                                                                                                                                                                                       |
| 14637144_x_at | 1922.90  | 0.001953 P | 802.80   | 0.004150 P | -1120.10  | -2.64 | 0.000214 | Psm6     | tyrosine 3-monooxygenase/tryptophan 5-monooxygenase activation protein, beta polypeptide                                                                                                                         |
| 14638082_at   | 438.00   | 0.001221 P | 200.40   | 0.004150 P | -237.60   | -2.64 | 0.001486 | Rik      | proteasome (prosome, macropain) subunit, alpha type 6                                                                                                                                                            |
| 14646147_at   | 562.10   | 0.00415 P  | 197.60   | 0.129639 A | -364.50   | -2.64 | 0.000241 | Rbm39    | RIKEN cDNA 2310028N02 gene                                                                                                                                                                                       |
| 14648188_at   | 1661.40  | 0.00415 P  | 522.30   | 0.056152 M | -1139.10  | -2.64 | 0.000189 | Ucp2     | Mus musculus adult pancreas islet cells cDNA, RIKEN full-length enriched library, clone: C820020J16 product: unknown EST, full insert sequence.                                                                  |
| 14648249_at   | 11366.90 | 0.000244 P | 4187.10  | 0.000244 P | -7179.80  | -2.64 | 0.000020 | Gpd1     | uncoupling protein 2, mitochondrial                                                                                                                                                                              |
| 14649026_at   | 352.90   | 0.000732 P | 78.90    | 0.194580 A | -274.00   | -2.64 | 0.001077 | lfnar1   | glycerol-3-phosphate dehydrogenase 1 (soluble)                                                                                                                                                                   |
| 14649379_at   | 529.30   | 0.000732 P | 267.90   | 0.018555 P | -261.40   | -2.64 | 0.000346 | Kdr      | interferon (alpha and beta) receptor 1                                                                                                                                                                           |
| 14649568_at   | 545.90   | 0.000732 P | 290.00   | 0.067627 A | -255.90   | -2.64 | 0.000214 | Klb      | kinase insert domain protein receptor                                                                                                                                                                            |
| 14652161_at   | 766.80   | 0.000244 P | 327.60   | 0.000244 P | -439.20   | -2.64 | 0.000046 | Tiparp   | kinase insert domain protein receptor                                                                                                                                                                            |
| 1465385_at    | 1179.10  | 0.000732 P | 618.90   | 0.002930 P | -560.20   | -2.64 | 0.000023 | Exoc6    | klortho beta                                                                                                                                                                                                     |
| 14653919_at   | 846.30   | 0.001953 P | 93.00    | 0.194580 A | -753.30   | -2.64 | 0.000027 | EG665081 | Mus musculus adult male olfactory brain cDNA, RIKEN full-length enriched library, clone: 6430549I20 product: hypothetical WWE domain/Zinc finger C-x8-C-x5-C-x3-H type containing protein, full insert sequence. |
| 1465395_at    | 465.70   | 0.001221 P | 158.20   | 0.366211 A | -307.50   | -2.64 | 0.000078 | Pparg1a  | SEC15 homolog (S. cerevisiae)                                                                                                                                                                                    |
| 1465719_s_at  | 341.50   | 0.005859 P | 140.90   | 0.219482 A | -200.60   | -2.83 | 0.000692 | Arm1     | RIKEN cDNA A830037N07 gene                                                                                                                                                                                       |
| 1465733_a_at  | 1359.40  | 0.000244 P | 542.60   | 0.004150 P | -816.80   | -2.83 | 0.000774 | Rik      | RIKEN cDNA 2310016N05 gene                                                                                                                                                                                       |
| 1466236_a_at  | 476.80   | 0.005859 P | 182.20   | 0.004150 P | -294.60   | -2.83 | 0.003041 | Eva1     | 1110019J04                                                                                                                                                                                                       |
| 1467434_at    | 3894.40  | 0.000244 P | 1536.00  | 0.000244 P | -2358.40  | -2.83 | 0.000167 | Gpd2     | RIKEN cDNA 1110019J04 gene                                                                                                                                                                                       |
| 1468901_at    | 1820.30  | 0.000244 P | 658.00   | 0.001221 P | -1162.30  | -2.83 | 0.000020 | Cebpb    | epithelial V-like antigen                                                                                                                                                                                        |
| 1469038_a_at  | 482.40   | 0.001221 P | 179.10   | 0.067627 A | -303.30   | -2.83 | 0.003041 | Csnk2a1  | glycerol phosphate dehydrogenase 1, mitochondrial                                                                                                                                                                |
| 1469657_at    | 425.40   | 0.001221 P | 159.00   | 0.004150 P | -266.40   | -2.83 | 0.000492 | Ucp3     | CCAAT/enhancer binding protein (C/EBP), beta casein kinase II, alpha 1 polypeptide                                                                                                                               |
| 146721_s_at   | 697.60   | 0.001221 P | 304.30   | 0.023926 P | -393.30   | -2.83 | 0.000167 | Tiparp   | uncoupling protein 3, mitochondrial                                                                                                                                                                              |
| 146798_a_at   | 1337.90  | 0.001953 P | 544.10   | 0.005859 P | -793.80   | -2.83 | 0.000692 | Ppp1r15b | Mus musculus adult male olfactory brain cDNA, RIKEN full-length enriched library, clone: 6430549I20 product: hypothetical WWE domain/Zinc finger C-x8-C-x5-C-x3-H type containing protein, full insert sequence. |
| 1467262_at    | 918.00   | 0.000732 P | 403.10   | 0.000244 P | -514.90   | -2.83 | 0.000241 | Xist     | RIKEN cDNA 1810033K10 gene                                                                                                                                                                                       |
| 1467957_at    | 1595.90  | 0.000732 P | 581.50   | 0.000732 P | -1014.40  | -2.83 | 0.000046 | Rik      | inactive X specific transcripts                                                                                                                                                                                  |
| 1468083_at    | 2594.40  | 0.000244 P | 1095.80  | 0.000244 P | -1498.60  | -2.83 | 0.000020 | Rik      | 9530008L14                                                                                                                                                                                                       |
| 1468318_at    | 6902.90  | 0.000244 P | 2546.20  | 0.000244 P | -4356.70  | -2.83 | 0.000020 | Adfp     | RIKEN cDNA 9530008L14 gene                                                                                                                                                                                       |
| 1468609_at    | 528.60   | 0.001221 P | 191.70   | 0.149658 A | -336.90   | -2.83 | 0.000167 | Tst      | 2310043N10                                                                                                                                                                                                       |
| 1468864_at    | 1812.20  | 0.000244 P | 829.90   | 0.000732 P | -982.30   | -2.83 | 0.000035 | Snrk     | RIKEN cDNA 2310043N10 gene                                                                                                                                                                                       |
| 1469442_at    | 900.40   | 0.001953 P | 356.20   | 0.002930 P | -544.20   | -2.83 | 0.000552 | Pex11a   | adipose differentiation related protein                                                                                                                                                                          |
| 1450012_x_at  | 910.90   | 0.005859 P | 630.00   | 0.004150 P | -280.90   | -2.83 | 0.003699 | Ywhag    | thiosulfate sulfurtransferase, mitochondrial                                                                                                                                                                     |
| 1450639_at    | 235.30   | 0.023926 P | 66.40    | 0.657227 A | -168.90   | -2.83 | 0.001201 | Slc28a2  | SNF related kinase                                                                                                                                                                                               |
| 1450718_at    | 337.60   | 0.001953 P | 117.90   | 0.246094 A | -219.70   | -2.83 | 0.000130 | Sh2b2    | peroxisomal biogenesis factor 11a                                                                                                                                                                                |
| 1452203_at    | 227.20   | 0.00415 P  | 70.00    | 0.171387 A | -157.20   | -2.83 | 0.000167 | Obfc2a   | 3-monooxygenase/tryptophan 5-monooxygenase activation protein, beta polypeptide                                                                                                                                  |
| 1455456_a_at  | 781.50   | 0.005859 P | 230.80   | 0.030273 P | -550.70   | -2.83 | 0.004073 | Timm50   | mitochondrial carrier homolog 1                                                                                                                                                                                  |
| 1455815_a_at  | 2963.10  | 0.000244 P | 1382.70  | 0.000732 P | -1580.40  | -2.83 | 0.000020 | Ywhab    | glutathione S-transferase, alpha 4                                                                                                                                                                               |
| 1460718_s_at  | 950.90   | 0.000732 P | 407.40   | 0.002930 P | -543.50   | -2.83 | 0.001201 | Mtch1    | glutaredoxin 1 (thioltransferase)                                                                                                                                                                                |
| 14616368_at   | 1039.70  | 0.000732 P | 200.00   | 0.067627 A | -839.70   | -3.03 | 0.000020 | Gsta4    | glycerol-3-phosphate acyltransferase, mitochondrial                                                                                                                                                              |
| 14616592_at   | 595.10   | 0.005859 P | 229.00   | 0.018555 P | -366.10   | -3.03 | 0.003041 | Glrx     | glutaredoxin 1 (thioltransferase)                                                                                                                                                                                |
| 1419499_at    | 4271.90  | 0.000244 P | 1548.00  | 0.000732 P | -2723.90  | -3.03 | 0.000020 | Gpam     | glycerol-3-phosphate acyltransferase, mitochondrial                                                                                                                                                              |
| 1422704_at    | 1184.60  | 0.008057 P | 413.50   | 0.018555 P | -771.10   | -3.03 | 0.000101 | Gyk      | glycerol kinase                                                                                                                                                                                                  |
| 1426225_at    | 3709.00  | 0.000244 P | 1223.50  | 0.000244 P | -2485.50  | -3.03 | 0.000035 | Rbp4     | retinol binding protein 4, plasma                                                                                                                                                                                |

|              |          |          |   |  |         |          |   |           |       |          |                                                      |                                                                                                                                                                                                     |
|--------------|----------|----------|---|--|---------|----------|---|-----------|-------|----------|------------------------------------------------------|-----------------------------------------------------------------------------------------------------------------------------------------------------------------------------------------------------|
| 1434481_at   | 330.80   | 0.01416  | P |  | 115.60  | 0.334473 | A | -215.20   | -3.03 | 0.000966 | Rik                                                  | RIKEN cDNA 2810017F12 gene                                                                                                                                                                          |
| 1438644_x_at | 437.60   | 0.018555 | P |  | 116.10  | 0.246094 | A | -321.50   | -3.03 | 0.000389 | CommD9                                               | RIKEN cDNA 1810029F08 gene                                                                                                                                                                          |
| 1438993_a_at | 278.20   | 0.00415  | P |  | 115.80  | 0.398926 | A | -162.40   | -3.03 | 0.000130 | Atp6v1d                                              | ATPase, H+ transporting, V1 subunit D                                                                                                                                                               |
|              |          |          |   |  |         |          |   |           |       |          | Ccrn4l ///<br>Cog6 ///<br>ENSMUSG00<br>000073624 /// |                                                                                                                                                                                                     |
| 1448715_x_at | 4234.00  | 0.000244 | P |  | 2061.90 | 0.000244 | P | -2172.10  | -3.03 | 0.000020 | Sgip1                                                |                                                                                                                                                                                                     |
| 1448793_a_at | 3094.60  | 0.000244 | P |  | 1184.10 | 0.000244 | P | -1910.50  | -3.03 | 0.000020 | Sdc4                                                 | syndecan 4                                                                                                                                                                                          |
| 1449040_a_at | 4746.00  | 0.000244 | P |  | 1484.20 | 0.001953 | P | -3261.80  | -3.03 | 0.000020 | Sephs2                                               | senenophosphate synthetase 2                                                                                                                                                                        |
| 1449363_at   | 615.50   | 0.005859 | P |  | 146.30  | 0.246094 | A | -469.20   | -3.03 | 0.000101 | Atf3                                                 | activating transcription factor 3                                                                                                                                                                   |
| 1449434_at   | 21802.70 | 0.000244 | P |  | 8534.70 | 0.000244 | P | -13268.00 | -3.03 | 0.000492 | Car3                                                 | carbonic anhydrase 3                                                                                                                                                                                |
| 1450884_at   | 573.10   | 0.00293  | P |  | 167.90  | 0.129639 | A | -405.20   | -3.03 | 0.000089 | Cd36                                                 | CD36 antigen                                                                                                                                                                                        |
| 1416432_at   | 854.70   | 0.001953 | P |  | 327.30  | 0.000732 | P | -527.40   | -3.25 | 0.000389 | Pfkfb3                                               | RIKEN cDNA E330010H22 gene                                                                                                                                                                          |
| 1422612_at   | 3029.00  | 0.000244 | P |  | 1166.50 | 0.000732 | P | -1862.50  | -3.25 | 0.000020 | Hk2                                                  | hexokinase 2                                                                                                                                                                                        |
| 1424877_a_at | 1186.90  | 0.000244 | P |  | 269.50  | 0.004150 | P | -917.40   | -3.25 | 0.000027 | Alad                                                 | aminolevulinate, delta-, dehydratase                                                                                                                                                                |
| 1425678_a_at | 757.00   | 0.001221 | P |  | 231.60  | 0.056152 | M | -525.40   | -3.25 | 0.000147 | Snrk                                                 | SNF related kinase                                                                                                                                                                                  |
| 1426278_at   | 5716.90  | 0.000732 | P |  | 2309.90 | 0.005859 | P | -3407.00  | -3.25 | 0.000020 | Ifi27                                                | RIKEN cDNA 2310061N23 gene                                                                                                                                                                          |
| 1426989_at   | 664.80   | 0.000244 | P |  | 222.60  | 0.080566 | A | -442.20   | -3.25 | 0.000114 | Cistn3                                               | calsyntenin 3                                                                                                                                                                                       |
|              |          |          |   |  |         |          |   |           |       |          |                                                      | Mus musculus 15 days embryo male testis cDNA,<br>RIKEN full-length enriched library,<br>clone:8030496P13 product:hypothetical<br>Glutamine-rich region containing protein, full<br>insert sequence. |
| 1427150_at   | 323.10   | 0.007813 | P |  | 67.10   | 0.246094 | A | -256.00   | -3.25 | 0.000552 | Mil3                                                 | spouty homolog 2 (Drosophila)                                                                                                                                                                       |
| 1436584_at   | 552.00   | 0.000244 | P |  | 223.10  | 0.056152 | M | -328.90   | -3.25 | 0.000147 | Spry2                                                | cDNA sequence BC017545                                                                                                                                                                              |
| 1437709_x_at | 247.50   | 0.036133 | P |  | 64.10   | 0.432373 | A | -183.40   | -3.25 | 0.004073 | Ttc13                                                | protein phosphatase 2, regulatory subunit B<br>(B56), delta isoform                                                                                                                                 |
| 1450560_a_at | 366.00   | 0.00293  | P |  | 85.60   | 0.194580 | A | -280.40   | -3.25 | 0.000438 | Ppp2r5d                                              | ectonucleoside triphosphate diphosphohydrolase<br>5                                                                                                                                                 |
| 1451765_a_at | 346.20   | 0.000244 | P |  | 101.70  | 0.129639 | A | -244.50   | -3.25 | 0.000692 | Entpd5                                               | dual specificity phosphatase 6                                                                                                                                                                      |
| 1415834_at   | 561.10   | 0.000244 | P |  | 159.00  | 0.056152 | M | -402.10   | -3.48 | 0.000027 | Dusp6                                                |                                                                                                                                                                                                     |
| 1416505_at   | 4470.80  | 0.000732 | P |  | 1335.60 | 0.000244 | P | -3135.20  | -3.48 | 0.000046 | Nr4a1                                                | nuclear receptor subfamily 4, group A, member 1                                                                                                                                                     |
| 1418059_at   | 675.30   | 0.000732 | P |  | 189.20  | 0.030273 | P | -486.10   | -3.48 | 0.000020 | Elttd1                                               | ETL1                                                                                                                                                                                                |
| 1418295_s_at | 2972.60  | 0.000244 | P |  | 895.90  | 0.000244 | P | -2076.70  | -3.48 | 0.000020 | Dgat1                                                | diacylglycerol O-acyltransferase 1                                                                                                                                                                  |
| 1423619_at   | 2522.70  | 0.000244 | P |  | 466.50  | 0.010742 | P | -2056.20  | -3.48 | 0.000020 | Rasd1                                                | RAS, dexamethasone-induced 1                                                                                                                                                                        |
| 1423622_a_at | 4197.10  | 0.000244 | P |  | 1233.30 | 0.000732 | P | -2963.80  | -3.48 | 0.000020 | Ccnl1                                                | cyclin L                                                                                                                                                                                            |
| 1424384_a_at | 462.10   | 0.001221 | P |  | 130.10  | 0.080566 | A | -332.00   | -3.48 | 0.001486 | Znrf1                                                | zinc ring finger protein 1                                                                                                                                                                          |
| 1425341_at   | 1879.80  | 0.000244 | P |  | 453.40  | 0.014160 | P | -1426.40  | -3.48 | 0.000020 | Kcnk3                                                | potassium channel, subfamily K, member 3                                                                                                                                                            |
| 1425927_a_at | 598.50   | 0.01416  | P |  | 145.40  | 0.080566 | A | -453.10   | -3.48 | 0.002753 | Atf5                                                 | activating transcription factor 5                                                                                                                                                                   |
|              |          |          |   |  |         |          |   |           |       |          |                                                      | 1200015F23                                                                                                                                                                                          |
| 1428196_a_at | 2235.80  | 0.000732 | P |  | 565.60  | 0.000732 | P | -1670.20  | -3.48 | 0.000089 | Rik                                                  | RIKEN cDNA 1200015F23 gene                                                                                                                                                                          |
| 1428655_at   | 529.70   | 0.001953 | P |  | 143.40  | 0.334473 | A | -386.30   | -3.48 | 0.000023 | Ccdc128                                              | RIKEN cDNA 1110018J12 gene                                                                                                                                                                          |
|              |          |          |   |  |         |          |   |           |       |          |                                                      | LOC669888                                                                                                                                                                                           |
| 1431056_a_at | 14768.00 | 0.000244 | P |  | 3364.80 | 0.000244 | P | -11403.20 | -3.48 | 0.000027 | /// Lpl                                              | lipoprotein lipase                                                                                                                                                                                  |
| 1448517_at   | 521.20   | 0.005859 | P |  | 68.20   | 0.246094 | A | -453.00   | -3.48 | 0.002753 | Timm22                                               | translocase of inner mitochondrial membrane 22<br>homolog (yeast)                                                                                                                                   |
| 1449051_at   | 1109.60  | 0.000244 | P |  | 247.20  | 0.056152 | M | -862.40   | -3.48 | 0.000020 | Ppara                                                | peroxisome proliferator activated receptor alpha                                                                                                                                                    |
| 1460256_at   | 5657.70  | 0.000244 | P |  | 1865.20 | 0.000244 | P | -3792.50  | -3.48 | 0.000020 | Car3                                                 | carbonic anhydrase 3                                                                                                                                                                                |
| 1416238_at   | 258.80   | 0.00293  | P |  | 59.90   | 0.780518 | A | -198.90   | -3.73 | 0.000346 | Tie1                                                 | tyrosine kinase receptor 1                                                                                                                                                                          |
| 1417622_at   | 1198.40  | 0.001953 | P |  | 282.70  | 0.005859 | P | -915.70   | -3.73 | 0.000241 | Slc12a2                                              | solute carrier family 12, member 2                                                                                                                                                                  |
|              |          |          |   |  |         |          |   |           |       |          |                                                      | tyrosine 3-monooxygenase/tryptophan 5-<br>monooxygenase activation protein, beta<br>polypeptide                                                                                                     |
| 1420878_a_at | 397.70   | 0.005859 | P |  | 82.30   | 0.334473 | A | -315.40   | -3.73 | 0.000130 | Ywhab                                                | peroxisomal biogenesis factor 6                                                                                                                                                                     |
| 1424078_s_at | 447.80   | 0.001953 | P |  | 109.50  | 0.111572 | A | -338.30   | -3.73 | 0.000346 | Pex6                                                 | sterol regulatory element binding factor 1                                                                                                                                                          |
| 1426690_a_at | 956.70   | 0.000244 | P |  | 396.70  | 0.010742 | P | -560.00   | -3.73 | 0.000078 | Srebf1                                               | hypothetical protein 4732433J24                                                                                                                                                                     |
| 1436351_at   | 324.60   | 0.01416  | P |  | 132.50  | 0.533936 | A | -192.10   | -3.73 | 0.000618 | Coq3                                                 | nucleoprotein 50                                                                                                                                                                                    |
| 1450722_at   | 219.40   | 0.01416  | P |  | 60.40   | 0.696289 | A | -159.00   | -3.73 | 0.002032 | Nup50                                                |                                                                                                                                                                                                     |
|              |          |          |   |  |         |          |   |           |       |          |                                                      | 2310001A20                                                                                                                                                                                          |
| 1452159_at   | 1704.60  | 0.000244 | P |  | 623.40  | 0.000244 | P | -1081.20  | -3.73 | 0.000020 | Rik                                                  | RIKEN cDNA 2310001A20 gene                                                                                                                                                                          |
| 1416237_at   | 466.80   | 0.008057 | P |  | 137.00  | 0.398926 | A | -329.80   | -4.00 | 0.000492 | Eva1                                                 | epithelial V-like antigen                                                                                                                                                                           |
| 1416676_at   | 716.90   | 0.001953 | P |  | 144.80  | 0.111572 | A | -572.10   | -4.00 | 0.000027 | Kng1                                                 | kininogen                                                                                                                                                                                           |
|              |          |          |   |  |         |          |   |           |       |          |                                                      | adenylyl cyclase-associated CAP protein homolog<br>1 (S. cerevisiae, S. pombe)                                                                                                                      |
| 1417462_at   | 519.30   | 0.001953 | P |  | 116.10  | 0.219482 | A | -403.20   | -4.00 | 0.000030 | Cap1                                                 | frizzled homolog 4 (Drosophila)                                                                                                                                                                     |
| 1419301_at   | 2092.30  | 0.000732 | P |  | 458.00  | 0.010742 | P | -1634.30  | -4.00 | 0.000052 | Fzd4                                                 | glucose-6-phosphatase, catalytic, related<br>sequence                                                                                                                                               |
| 1423529_at   | 268.60   | 0.023926 | P |  | 37.70   | 0.633789 | A | -230.90   | -4.00 | 0.003041 | G6pc2                                                | Mus musculus, clone IMAGE:3983821, mRNA,<br>partial cds                                                                                                                                             |
| 1427820_at   | 630.00   | 0.056152 | M |  | 164.60  | 0.303711 | A | -465.40   | -4.00 | 0.001077 | ---                                                  |                                                                                                                                                                                                     |
| 1449945_at   | 1497.40  | 0.000732 | P |  | 391.00  | 0.008057 | P | -1106.40  | -4.00 | 0.000023 | Ppargc1b                                             | RIKEN cDNA 4631412G21 gene                                                                                                                                                                          |
| 1451756_at   | 939.70   | 0.008057 | P |  | 191.50  | 0.171387 | A | -748.20   | -4.00 | 0.000774 | Flt1                                                 | FMS-like tyrosine kinase 1                                                                                                                                                                          |
| 1417741_at   | 2945.00  | 0.000244 | P |  | 781.80  | 0.000244 | P | -2163.20  | -4.29 | 0.000020 | Pygl                                                 | liver glycogen phosphorylase                                                                                                                                                                        |
| 1424574_at   | 1517.70  | 0.005859 | P |  | 188.20  | 0.004150 | P | -1329.50  | -4.29 | 0.000492 | Tmed5                                                | RIKEN cDNA 3110020C18 gene                                                                                                                                                                          |
| 1449592_at   | 419.00   | 0.030273 | P |  | 72.70   | 0.466064 | A | -346.30   | -4.29 | 0.000241 | Tcf15                                                | transcription factor 15                                                                                                                                                                             |
| 1451336_at   | 249.90   | 0.008057 | P |  | 75.70   | 0.500000 | A | -174.20   | -4.29 | 0.004481 | Lgals4                                               | lectin, galactose binding, soluble 4                                                                                                                                                                |
|              |          |          |   |  |         |          |   |           |       |          |                                                      | 2310011J03                                                                                                                                                                                          |
| 1452043_at   | 344.40   | 0.000732 | P |  | 55.20   | 0.625244 | A | -289.20   | -4.29 | 0.004073 | Rik                                                  | RIKEN cDNA 2310011J03 gene                                                                                                                                                                          |
| 1452292_at   | 361.90   | 0.00293  | P |  | 63.60   | 0.500000 | A | -298.30   | -4.29 | 0.000147 | Ap2b1                                                | adaptor-related protein complex 2, beta 1 subunit                                                                                                                                                   |
| 1418350_at   | 881.20   | 0.000244 | P |  | 179.00  | 0.274170 | A | -702.20   | -4.59 | 0.000020 | Hbegf                                                | diphtheria toxin receptor                                                                                                                                                                           |
| 1418937_at   | 3429.20  | 0.001221 | P |  | 306.20  | 0.023926 | P | -3123.00  | -4.59 | 0.000023 | Dio2                                                 | deiodinase, iodothyronine, type II                                                                                                                                                                  |
|              |          |          |   |  |         |          |   |           |       |          |                                                      | Mus musculus adult male medulla oblongata<br>cDNA, RIKEN full-length enriched library,<br>clone:6330442K08 product:unknown EST, full<br>insert sequence.                                            |
| 1420909_at   | 436.70   | 0.018555 | P |  | 80.30   | 0.303711 | A | -356.40   | -4.59 | 0.000023 | Vegfa                                                | CCR4 carbon catabolite repression 4-like (S.<br>cerevisiae)                                                                                                                                         |
| 1425837_a_at | 1028.00  | 0.001221 | P |  | 158.20  | 0.046143 | P | -869.80   | -4.59 | 0.000101 | Ccrn4l                                               | RIKEN cDNA A830037N07 gene                                                                                                                                                                          |
| 1437751_at   | 402.00   | 0.005859 | P |  | 171.00  | 0.246094 | A | -231.00   | -4.59 | 0.000060 | Ppargc1a                                             | hypothetical protein D130005A03                                                                                                                                                                     |
| 1454712_at   | 2042.40  | 0.000244 | P |  | 478.80  | 0.000732 | P | -1563.60  | -4.59 | 0.000030 | Mcart1                                               |                                                                                                                                                                                                     |
|              |          |          |   |  |         |          |   |           |       |          |                                                      | ENSMUSG00<br>000073624                                                                                                                                                                              |
| 1455316_x_at | 19717.10 | 0.000244 | P |  | 3950.70 | 0.000244 | P | -15766.40 | -4.59 | 0.000020 |                                                      | peroxisome proliferative activated receptor,<br>gamma, coactivator 1                                                                                                                                |
| 1460336_at   | 801.40   | 0.001221 | P |  | 211.30  | 0.018555 | P | -590.10   | -4.59 | 0.000214 | Ppargc1a<br>2310076L09                               |                                                                                                                                                                                                     |
| 1424937_at   | 658.90   | 0.001221 | P |  | 163.90  | 0.046143 | P | -495.00   | -4.92 | 0.000307 | Rik                                                  | RIKEN cDNA 2310076L09 gene                                                                                                                                                                          |
| 1429177_x_at | 499.10   | 0.018555 | P |  | 50.10   | 0.432373 | A | -449.00   | -4.92 | 0.001336 | Sox17                                                | SRY-box containing gene 17                                                                                                                                                                          |
| 1448944_at   | 808.60   | 0.000732 | P |  | 162.00  | 0.095215 | A | -646.60   | -4.92 | 0.000023 | Nrp1                                                 | neuropilin                                                                                                                                                                                          |
| 1449019_at   | 1261.50  | 0.001953 | P |  | 285.90  | 0.014160 | P | -975.60   | -4.92 | 0.000147 | Akap1                                                | A kinase (PRKA) anchor protein 1                                                                                                                                                                    |
| 1455136_at   | 1539.00  | 0.000244 | P |  | 220.90  | 0.046143 | P | -1318.10  | -4.92 | 0.000020 | Atp1a2                                               | Mus musculus, clone IMAGE:1365759, mRNA                                                                                                                                                             |
| 1418808_at   | 206.40   | 0.037598 | P |  | 29.80   | 0.725830 | A | -176.60   | -5.28 | 0.000273 | Calmi3                                               | RIKEN cDNA 2310068O22 gene                                                                                                                                                                          |
|              |          |          |   |  |         |          |   |           |       |          |                                                      | elongation of very long chain fatty acids<br>(FEN1/Elo2, SUR4/Elo3, yeast)-like 3                                                                                                                   |
| 1420722_at   | 1427.40  | 0.000244 | P |  | 317.80  | 0.008057 | P | -1109.60  | -5.28 | 0.000023 | Elov3                                                |                                                                                                                                                                                                     |
| 1450749_a_at | 351.20   | 0.010742 | P |  | 76.10   | 0.633789 | A | -275.10   | -5.28 | 0.001336 | Nr4a2                                                | nuclear receptor subfamily 4, group A, member 2                                                                                                                                                     |
| 1417461_at   | 1105.80  | 0.000244 | P |  | 286.00  | 0.014160 | P | -819.80   | -5.66 | 0.000023 | Cap1                                                 | adenylyl cyclase-associated CAP protein homolog<br>1 (S. cerevisiae, S. pombe)                                                                                                                      |
| 1426939_at   | 291.20   | 0.030273 |   |  |         |          |   |           |       |          |                                                      |                                                                                                                                                                                                     |

| 1427287_s_at | 379.40   | 0.00293 P  | 51.00   | 0.274170 A | -328.40   | -5.66  | 0.003041 | ltpr2                      | inositol 1,4,5-triphosphate receptor 5                                                         |
|--------------|----------|------------|---------|------------|-----------|--------|----------|----------------------------|------------------------------------------------------------------------------------------------|
| 1436851_at   | 466.20   | 0.000732 P | 71.50   | 0.165771 A | -394.70   | -6.06  | 0.000020 | Ptger1                     | hypothetical protein LOC234537                                                                 |
| 1450448_at   | 296.10   | 0.01416 P  | 47.10   | 0.780518 A | -249.00   | -6.06  | 0.000309 | Stc1                       | stanniocalcin                                                                                  |
| 1421173_at   | 1164.90  | 0.000732 P | 136.20  | 0.303711 A | -1028.70  | -6.50  | 0.000046 | Irf4                       | interferon regulatory factor 4                                                                 |
| 1428108_x_at | 219.60   | 0.037598 P | 39.40   | 0.753906 A | -180.20   | -6.50  | 0.004073 | Tmcc2                      | RIKEN cDNA 1110063G11 gene                                                                     |
| 1423646_at   | 302.60   | 0.000244 P | 36.60   | 0.601074 A | -266.00   | -6.96  | 0.000774 | Zdhhc3                     | zinc finger, DHHC domain containing 3                                                          |
| 1448530_at   | 2082.70  | 0.000244 P | 288.00  | 0.008057 P | -1794.70  | -6.96  | 0.000020 | Gmpr                       | guanosine monophosphate reductase                                                              |
| 1420941_at   | 7056.90  | 0.000244 P | 1063.60 | 0.001953 P | -5993.30  | -7.46  | 0.000020 | Rgs5                       | regulator of G-protein signaling 5                                                             |
| 1422213_s_at | 213.00   | 0.046143 P | 13.60   | 0.633789 A | -199.40   | -7.46  | 0.000552 | Foxh1                      | forkhead box H1                                                                                |
| 1427083_a_at | 139.20   | 0.001221 P | 14.20   | 0.888428 A | -125.00   | -7.46  | 0.000552 | Map4k5                     | mitogen-activated protein kinase kinase kinase kinase 5                                        |
| 1452298_a_at | 272.70   | 0.005859 P | 15.50   | 0.601074 A | -252.20   | -7.46  | 0.001486 | Myo5b                      | myosin Vb                                                                                      |
| 1418098_at   | 303.00   | 0.053711 M | 35.30   | 0.567627 A | -267.70   | -8.00  | 0.004073 | Adcy4                      | adenylate cyclase 4                                                                            |
| 1421451_at   | 171.00   | 0.00293 P  | 27.60   | 0.780518 A | -143.40   | -8.00  | 0.000774 | Crb1                       | crumbs homolog 1 (Drosophila)                                                                  |
| 1431011_at   | 232.50   | 0.000244 P | 30.70   | 0.665527 A | -201.80   | -8.00  | 0.003355 | Dlst                       | RIKEN cDNA 4930529O08 gene                                                                     |
| 1448741_at   | 196.70   | 0.023926 P | 27.70   | 0.466064 A | -169.00   | -8.00  | 0.001077 | Slc3a1                     | solute carrier family 3, member 1                                                              |
| 1420334_at   | 198.30   | 0.037598 P | 10.10   | 0.780518 A | -188.20   | -8.57  | 0.002490 | Slc12a8                    | cation-chloride cotransporter 9                                                                |
| 1422703_at   | 270.00   | 0.005615 P | 31.20   | 0.274170 A | -238.80   | -8.57  | 0.000020 | Gyk                        | glycerol kinase                                                                                |
| 1434496_at   | 365.50   | 0.037598 P | 28.60   | 0.888428 A | -336.90   | -8.57  | 0.000966 | Plk3                       | cytokine inducible kinase                                                                      |
| 1420411_a_at | 191.10   | 0.023926 P | 14.10   | 0.888428 A | -177.00   | -9.19  | 0.002250 | Pi4k2b                     | phosphatidylinositol 4-kinase type 2 beta staufen (RNA binding protein) homolog 2 (Drosophila) |
| 1425534_at   | 219.90   | 0.056152 M | 8.60    | 0.725830 A | -211.30   | -9.19  | 0.002490 | Stau2                      | Stau2                                                                                          |
| 1431611_a_at | 279.40   | 0.037598 P | 29.20   | 0.753906 A | -250.20   | -9.19  | 0.001201 | Cadm1                      | immunoglobulin superfamily, member 4                                                           |
| 1417714_x_at | 37690.60 | 0.000244 P | 2689.00 | 0.005859 P | -35001.60 | -9.85  | 0.000052 | Hba-a1                     | hemoglobin alpha, adult chain 1                                                                |
| 1420841_at   | 252.60   | 0.018555 P | 15.80   | 0.780518 A | -236.80   | -9.85  | 0.000346 | Ptprf                      | protein tyrosine phosphatase, receptor type, F                                                 |
| 1421339_at   | 130.60   | 0.056152 M | 13.60   | 0.888428 A | -117.00   | -9.85  | 0.003355 | Exst3                      | exostosins (multiple)-like 3                                                                   |
| 1421671_at   | 189.50   | 0.023926 P | 8.20    | 0.888428 A | -181.30   | -9.85  | 0.000346 | Hsd17b3                    | hydroxysteroid (17-beta) dehydrogenase 3                                                       |
| 1450249_s_at | 165.40   | 0.018555 P | 18.40   | 0.870361 A | -147.00   | -10.56 | 0.001201 | Kif5a /// Kif5c 3110043J09 | kinesin family member 5A                                                                       |
| 1451320_at   | 318.40   | 0.00293 P  | 18.10   | 0.805420 A | -300.30   | -10.56 | 0.000023 | Rik                        | RIKEN cDNA 3110043J09 gene                                                                     |
| 1452065_at   | 154.60   | 0.008057 P | 9.60    | 0.888428 A | -145.00   | -10.56 | 0.001336 | Vstm2                      | cDNA sequence BC027127                                                                         |
| 1435035_at   | 158.40   | 0.018555 P | 4.30    | 0.870361 A | -154.10   | -12.13 | 0.000307 | Rg9mt2                     | RIKEN cDNA 3110023L08 gene                                                                     |
| 1449383_at   | 587.20   | 0.046143 P | 51.10   | 0.601074 A | -536.10   | -12.13 | 0.000346 | Adssl1                     | adenylosuccinate synthetase 1, muscle                                                          |
| 1450662_at   | 265.60   | 0.00293 P  | 10.30   | 0.870361 A | -255.30   | -12.13 | 0.000966 | Tesk1                      | testis specific protein kinase 1                                                               |
| 1451977_at   | 128.40   | 0.030273 P | 9.10    | 0.976074 A | -119.30   | -12.13 | 0.002250 | Dyrk1a                     | dual-specificity tyrosine-(Y)-phosphorylation regulated kinase 1a                              |
| 1425546_a_at | 510.30   | 0.001221 P | 25.40   | 0.533936 A | -484.90   | -13.00 | 0.000030 | Trf                        | transferrin                                                                                    |
| 1415900_a_at | 224.90   | 0.023926 P | 14.20   | 0.888428 A | -210.70   | -13.93 | 0.000241 | Kit                        | kit oncogene                                                                                   |
| 1449860_at   | 301.30   | 0.005615 P | 20.50   | 0.753906 A | -280.80   | -13.93 | 0.001651 | Higd1b                     | RIKEN cDNA 2310056K19 gene                                                                     |
| 1416568_a_at | 223.30   | 0.01416 P  | 15.50   | 0.805420 A | -207.80   | -14.93 | 0.000089 | Acin1                      | apoptotic chromatin condensation inducer in the nucleus                                        |
| 1424208_at   | 414.10   | 0.008057 P | 21.90   | 0.500000 A | -392.20   | -14.93 | 0.000214 | Ptger4                     | prostaglandin E receptor 4 (subtype EP4)                                                       |
| 1448265_x_at | 213.10   | 0.056152 M | 15.10   | 0.500000 A | -198.00   | -14.93 | 0.000774 | Eva1                       | epithelial V-like antigen                                                                      |
| 1423978_at   | 368.30   | 0.00293 P  | 21.90   | 0.633789 A | -346.40   | -17.15 | 0.000189 | Sbk1                       | SH3-binding kinase                                                                             |
| 1450170_x_at | 1576.10  | 0.000732 P | 35.90   | 0.239502 A | -1540.20  | -18.38 | 0.000040 | H2-D1                      | histocompatibility 2, D region locus 1                                                         |
| 1450750_a_at | 418.70   | 0.000732 P | 12.80   | 0.533936 A | -405.90   | -18.38 | 0.000030 | Nr4a2                      | nuclear receptor subfamily 4, group A, member 2                                                |
| 1417422_at   | 329.90   | 0.00293 P  | 9.20    | 0.805420 A | -320.70   | -19.70 | 0.000552 | Gnmt                       | glycine N-methyltransferase                                                                    |
| 1426270_at   | 183.00   | 0.023926 P | 11.70   | 0.725830 A | -171.30   | -19.70 | 0.000966 | Smc5                       | SMC5 protein                                                                                   |
| 1427983_at   | 245.60   | 0.056152 M | 7.10    | 0.989258 A | -238.50   | -19.70 | 0.001832 | Suhw3                      | hypothetical protein MGC38010                                                                  |
| 1433139_at   | 165.40   | 0.030273 P | 7.70    | 0.904785 A | -157.70   | -21.11 | 0.004481 | Btbd14b                    | RIKEN cDNA 4930511N13 gene                                                                     |
| 1436761_s_at | 134.10   | 0.030273 P | 2.60    | 0.725830 A | -131.50   | -21.11 | 0.002032 | Rik                        | RIKEN cDNA 1200015N20 gene                                                                     |
| 1418938_at   | 426.30   | 0.000244 P | 9.50    | 0.780518 A | -416.80   | -22.63 | 0.000020 | Dio2                       | deiodinase, iodothyronine, type II                                                             |
| 1448197_at   | 159.30   | 0.030273 P | 6.20    | 0.976074 A | -153.10   | -22.63 | 0.000241 | Ceacam11                   | CEA-related cell adhesion molecule 11                                                          |
| 1420444_at   | 538.80   | 0.010742 P | 6.10    | 0.805420 A | -532.70   | -24.25 | 0.000189 | Slc22a3                    | solute carrier family 22 (organic cation transporter), member 3                                |
| 1449771_at   | 211.10   | 0.01416 P  | 5.60    | 0.850342 A | -205.50   | -24.25 | 0.000114 | ---                        | EST                                                                                            |
| 1420549_at   | 292.90   | 0.008057 P | 4.80    | 0.904785 A | -288.10   | -27.86 | 0.000030 | Gbp1                       | guanylate nucleotide binding protein 1                                                         |
| 1426081_a_at | 2014.70  | 0.000732 P | 60.20   | 0.533936 A | -1954.50  | -29.86 | 0.000068 | Dio2                       | deiodinase, iodothyronine, type II                                                             |
| 1449461_at   | 3064.90  | 0.000244 P | 63.10   | 0.828613 A | -3001.80  | -36.76 | 0.000020 | Rbp7                       | retinol binding protein 7, cellular                                                            |
| 1450168_at   | 187.40   | 0.046143 P | 4.20    | 0.994141 A | -183.20   | -36.76 | 0.001486 | Ankrd12                    | RIKEN cDNA 2900001A12 gene                                                                     |
| 1428137_at   | 183.20   | 0.056152 M | 6.10    | 0.989258 A | -177.10   | -39.40 | 0.003355 | Arl8b                      | RIKEN cDNA 3100002J04 gene                                                                     |
| 1460613_x_at | 188.50   | 0.030273 P | 10.10   | 0.753906 A | -178.40   | -39.40 | 0.002490 | Gh                         | growth hormone                                                                                 |
| 1427677_a_at | 323.90   | 0.030273 P | 4.10    | 0.870361 A | -319.80   | -51.98 | 0.001486 | Sox6                       | SRY-box containing gene 6                                                                      |

A: absent, detection P > 0.06; P: present, detection P < 0.04; M: marginal, detection P < 0.06 > 0.04.  
Genes in the calcium signaling pathway that are differentially expressed in the two strains are denoted in bold.
