# Supplementary material
Source: PubMed Central journal article supplement (PMC2685336)
Supplement: 01095.2008_2.pdf [file 01095.2008_2.pdf]

**Supplementary Table 2. Differentially expressed genes in the aortic wall of B6.apoE-/- and C3H.apoE-/- mice fed a Western diet.**

| Alfymetrix Probe Set ID | CW Signal Intensity | CW Detection p-value | BW Signal Intensity | BW Detection p-value | BW Detection Call | BW vs CW Signal Difference | BW vs CW Change p-value | Gene Symbol            | Gene Name                                                                                                                                  |
|-------------------------|---------------------|----------------------|---------------------|----------------------|-------------------|----------------------------|-------------------------|------------------------|--------------------------------------------------------------------------------------------------------------------------------------------|
| 1420884_at              | 5.40                | 0.98584A             | 1251.50             | 0.000244             | P                 | 1246.10                    | 157.59                  | 0.00002 Sin            | RIKEN cDNA 2310045A07 gene                                                                                                                 |
| 1424967_at              | 8.50                | 0.85934A             | 1746.30             | 0.000244             | P                 | 1737.80                    | 147.63                  | 0.00002 Tnn2           | troponin T2, cardiac                                                                                                                       |
| 1422536_at              | 8.10                | 0.981445A            | 1058.70             | 0.000244             | P                 | 1050.60                    | 137.19                  | 0.00002 Tnn3           | troponin I, cardiac                                                                                                                        |
| 1449071_at              | 10.20               | 0.80542A             | 2280.30             | 0.000244             | P                 | 2270.10                    | 128.00                  | 0.00002 Myl7           | myosin light chain, regulatory A                                                                                                           |
| 1448554_s_at            | 17.80               | 0.904785A            | 1869.10             | 0.000244             | P                 | 1851.30                    | 119.43                  | 0.00002 Myh7           | myosin, heavy polypeptide 7, cardiac muscle, beta                                                                                          |
| 1418726_at              | 11.10               | 0.72583A             | 1327.70             | 0.000732             | P                 | 1316.60                    | 90.51                   | 0.00004 Tnn2           | troponin T2, cardiac                                                                                                                       |
| 1452705_at              | 8.70                | 0.964785A            | 1057.00             | 0.000244             | P                 | 1050.30                    | 64.45                   | 0.00002 Pknox1         | cholinergic receptor, nicotinic, alpha polypeptide 3                                                                                       |
| 1422645_s_at            | 1.00                | 0.65557A             | 1758.50             | 0.000244             | P                 | 1739.80                    | 73.52                   | 0.00008 Cyp2b10        | cytochrome P450, 2b20                                                                                                                      |
| 1415927_at              | 51.90               | 0.266113A            | 3536.90             | 0.000244             | P                 | 3485.00                    | 68.59                   | 0.00002 Act1           | actin, alpha, cardiac                                                                                                                      |
| 1452650_at              | 3.60                | 0.994141A            | 160.90              | 0.056152             | M                 | 157.30                     | 45.25                   | 0.001077 Trim62        | RIKEN cDNA 6330414G21 gene                                                                                                                 |
| 1451740_at              | 9.70                | 0.888428A            | 166.00              | 0.018555             | P                 | 156.30                     | 34.30                   | 0.004481 Paip1         | Mus musculus ES cells cDNA, RIKEN full-length enriched library, clone:C33045B02 product:unknown EST, full insert sequence.                 |
| 1448826_at              | 128.70              | 0.149658A            | 2555.60             | 0.000244             | P                 | 2426.90                    | 27.86                   | 0.00002 Myh6           | myosin heavy chain, cardiac muscle, adult                                                                                                  |
| 1429379_at              | 5.90                | 0.696289A            | 192.70              | 0.005859             | P                 | 186.80                     | 22.63                   | 0.00008 Kld1           | extra cellular link domain-containing 1                                                                                                    |
| 1456746_s_at            | 8.90                | 0.799316A            | 323.40              | 0.000732             | P                 | 314.50                     | 22.63                   | 0.001832 Cd99i2        | MIC2 (monoclonal Imperial Cancer Research Fund 2)-like 1                                                                                   |
| 1453025_at              | 3.20                | 0.962402A            | 157.60              | 0.030273             | P                 | 154.40                     | 21.11                   | 0.000167 2900006F19Rik | RIKEN cDNA 2611070G07 gene                                                                                                                 |
| 1421144_at              | 73.80               | 0.432373A            | 2272.50             | 0.000244             | P                 | 2198.70                    | 17.15                   | 0.00002 Rrgp1          | retinitis pigmentosa GTFase regulator interacting protein 1                                                                                |
| 1421534_at              | 14.00               | 0.80542A             | 245.10              | 0.008057             | P                 | 231.10                     | 17.15                   | 0.000389 Dna5h         | fibroblast growth factor inducible 15                                                                                                      |
| 1422580_at              | 59.50               | 0.633789A            | 1043.00             | 0.000244             | P                 | 983.50                     | 16.00                   | 0.00002 My14           | myosin light chain, alkali, cardiac atria                                                                                                  |
| 1429240_x_at            | 5.20                | 0.865234A            | 199.50              | 0.023926             | P                 | 194.30                     | 16.00                   | 0.001077 Ltn7b         | lin 7 homolog b (C. elegans)                                                                                                               |
| 1452010_at              | 10.10               | 0.985451A            | 121.70              | 0.000244             | P                 | 111.10                     | 16.00                   | 0.00002 Chrm3          | cholinergic receptor, nicotinic, alpha polypeptide 3                                                                                       |
| 1425487_at              | 10.10               | 0.72583A             | 212.30              | 0.01418              | P                 | 202.20                     | 13.93                   | 0.003355 Slu7          | step II splicing factor SLU7                                                                                                               |
| 1428722_at              | 7.30                | 0.5A                 | 567.20              | 0.018555             | P                 | 559.90                     | 13.93                   | 0.00004 Ckmt2          | creatine kinase, mitochondrial 2                                                                                                           |
| 1430820_a_at            | 13.40               | 0.989258A            | 172.10              | 0.056152             | M                 | 158.70                     | 13.93                   | 0.001651 Bbx           | RIKEN cDNA 5730403O13 gene                                                                                                                 |
| 1415850_at              | 17.40               | 0.601074A            | 414.10              | 0.01416              | P                 | 396.70                     | 13.00                   | 0.000438 Rasa3         | RAS p21 protein activator 3                                                                                                                |
| 1448520_at              | 7.50                | 0.753996A            | 135.00              | 0.056152             | M                 | 127.50                     | 13.00                   | 0.004073 Dclre1b       | DNA cross-link repair 1B, PSO2 homolog (S. cerevisiae)                                                                                     |
| 1454674_at              | 36.40               | 0.665527A            | 468.60              | 0.001953             | P                 | 432.20                     | 12.13                   | 0.000241 Fez1          | Mus musculus. Similar to fasciculation and elongation protein zeta 1 (zyglin 1), clone MGC:12933 IMAGE:4035444, mRNA, complete cds         |
| 1430979_a_at            | 18.00               | 0.888428A            | 206.20              | 0.001953             | P                 | 188.20                     | 11.31                   | 0.00225 Prdx2          | peroxiredoxin 2                                                                                                                            |
| 1418370_at              | 56.20               | 0.567627A            | 643.70              | 0.000244             | P                 | 587.50                     | 10.56                   | 0.00013 Tnn1c1         | troponin C, cardiac/slow skeletal                                                                                                          |
| 1418095_at              | 4.50                | 0.780518A            | 146.50              | 0.048143             | P                 | 142.00                     | 9.85                    | 0.001486 Srxp          | cardiac muscle protein, X-linked                                                                                                           |
| 1450626_at              | 7.60                | 0.80542A             | 162.90              | 0.018555             | P                 | 155.30                     | 9.85                    | 0.003041 Manba         | mannosidase, beta A, lysosomal                                                                                                             |
| 1430522_a_at            | 22.50               | 0.601074A            | 319.40              | 0.010742             | P                 | 296.90                     | 9.19                    | 0.004073 Vamp5         | vamp5                                                                                                                                      |
| 1438390_s_at            | 304.60              | 0.129639A            | 4832.30             | 0.001953             | P                 | 4527.70                    | 9.19                    | 0.00003 Pttg1          | pituitary tumor-transforming 1                                                                                                             |
| 1416125_at              | 116.20              | 0.246094A            | 986.40              | 0.000732             | P                 | 870.20                     | 8.57                    | 0.00002 Fkbp5          | FK506 binding protein 5                                                                                                                    |
| 1417607_at              | 52.60               | 0.533936A            | 684.40              | 0.000244             | P                 | 631.80                     | 8.57                    | 0.00002 Cxvad2         | cytochrome c oxidase, subunit VI a, polypeptide 2                                                                                          |
| 1419197_x_at            | 16.30               | 0.919434A            | 317.00              | 0.037598             | P                 | 300.70                     | 8.57                    | 0.000492 Hamp1         | hepcidin antimicrobial peptide                                                                                                             |
| 1421035_a_at            | 19.00               | 0.888428A            | 209.50              | 0.056152             | M                 | 190.50                     | 8.57                    | 0.001486 Magi3         | expressed sequence AA407180                                                                                                                |
| 1448327_at              | 20.40               | 0.665527A            | 252.60              | 0.001221             | P                 | 232.20                     | 8.57                    | 0.001651 Actn2         | actinin alpha 2                                                                                                                            |
| 1451203_at              | 208.50              | 0.023926P            | 1926.00             | 0.000732             | P                 | 1717.50                    | 8.57                    | 0.000023 Mb            | myoglobin                                                                                                                                  |
| 1424412_at              | 25.40               | 0.828613A            | 218.50              | 0.010742             | P                 | 193.10                     | 8.00                    | 0.000307 Cgpf11        | RIKEN cDNA 2210417C17 gene                                                                                                                 |
| 1425336_x_at            | 522.60              | 0.000244P            | 5761.70             | 0.001953             | P                 | 5239.10                    | 8.00                    | 0.000307 H2-K1         | histocompatibility 2, K region                                                                                                             |
| 1423649_at              | 57.10               | 0.466064A            | 300.80              | 0.000244             | P                 | 243.70                     | 7.46                    | 0.002753 Tmem68        | RIKEN cDNA 2010300G19 gene                                                                                                                 |
| 1424932_at              | 19.50               | 0.633789A            | 161.80              | 0.001953             | P                 | 142.30                     | 7.46                    | 0.003355 Egrf          | epidermal growth factor receptor                                                                                                           |
| 1426271_at              | 15.70               | 0.533936A            | 195.70              | 0.00293              | P                 | 180.00                     | 7.46                    | 0.002753 Smc5          | SMC5 protein                                                                                                                               |
| 1453235_at              | 14.30               | 0.72583A             | 132.60              | 0.000244             | P                 | 116.30                     | 7.46                    | 0.001486 Tsr11         | thromboxan-like (32kD)                                                                                                                     |
| 1420991_at              | 68.20               | 0.398926A            | 687.70              | 0.000244             | P                 | 619.50                     | 6.96                    | 0.00002 Ankr1          | cardiac responsive adriamycin protein                                                                                                      |
| 1422257_s_at            | 83.00               | 0.5A                 | 1682.90             | 0.008057             | P                 | 1599.90                    | 6.96                    | 0.000346 Cyp2b10       | cytochrome P450, 2b10, phenobarbital inducible, type B                                                                                     |
| 1423222_at              | 57.80               | 0.171387A            | 520.10              | 0.000244             | P                 | 462.30                     | 6.96                    | 0.001201 Lin7c         | RIKEN cDNA 9130007B12 gene                                                                                                                 |
| 1452464_a_at            | 27.30               | 0.828613A            | 264.00              | 0.036133             | P                 | 236.70                     | 6.96                    | 0.002032 Metap11       | methionine aminopeptidase-like 1                                                                                                           |
| 1416154_at              | 9.30                | 0.888428A            | 130.60              | 0.00415              | P                 | 121.30                     | 6.50                    | 0.003041 Sp54          | signal recognition particle 54 kDa                                                                                                         |
| 1432517_a_at            | 82.60               | 0.366211A            | 442.20              | 0.000732             | P                 | 359.60                     | 6.50                    | 0.000389 Nnmt          | nicotinamide N-methyltransferase                                                                                                           |
| 1451787_at              | 106.30              | 0.219482A            | 529.10              | 0.000732             | P                 | 422.80                     | 6.50                    | 0.000552 Cyp2b10       | cytochrome P450, 2b20                                                                                                                      |
| 1451683_x_at            | 21.90               | 0.870381A            | 175.70              | 0.030273             | P                 | 153.80                     | 6.06                    | 0.000438 H2-D1         | histocompatibility 2, L region                                                                                                             |
| 1417559_at              | 69.40               | 0.344473A            | 488.00              | 0.000244             | P                 | 418.60                     | 5.96                    | 0.000147 Sfn1          | sideroflexin 1                                                                                                                             |
| 1451006_at              | 62.20               | 0.432373A            | 409.90              | 0.000244             | P                 | 338.00                     | 5.28                    | 0.000114 Xrb5a         | saxitoxin dehydrogenase                                                                                                                    |
| 1418225_at              | 62.20               | 0.5A                 | 311.10              | 0.05859              | P                 | 248.90                     | 5.96                    | 0.000552 Orc2l         | origin recognition complex, subunit 2-like (S. cerevisiae)                                                                                 |
| 1438083_at              | 21.00               | 0.850342A            | 135.80              | 0.01416              | P                 | 114.80                     | 4.92                    | 0.001336 Hhip          | Hedgehog-interacting protein                                                                                                               |
| 1439200_x_at            | 37.80               | 0.780518A            | 212.80              | 0.056152             | M                 | 175.00                     | 4.92                    | 0.001832 ---           | Mus musculus, clone IMAGE:1230530, mRNA                                                                                                    |
| 1450399_at              | 75.80               | 0.5A                 | 380.90              | 0.048143             | P                 | 305.10                     | 4.92                    | 0.001201 Psen1         | presenilin 1                                                                                                                               |
| 1450962_at              | 17.50               | 0.056152A            | 918.60              | 0.000244             | P                 | 740.00                     | 4.92                    | 0.000114 Pfb           | phospholamban                                                                                                                              |
| 1419839_x_at            | 195.60              | 0.149658A            | 786.90              | 0.000244             | P                 | 591.30                     | 4.92                    | 0.000035 Prpf19        | DNA segment, Chr 19, Wayne State University 55, expressed                                                                                  |
| 1424105_a_at            | 132.60              | 0.366211A            | 833.50              | 0.000732             | P                 | 700.90                     | 4.59                    | 0.00004 Pttg1          | pituitary tumor-transforming 1                                                                                                             |
| 1416752_at              | 18.60               | 0.80542A             | 189.80              | 0.018555             | P                 | 171.20                     | 4.29                    | 0.000046 Ldb3          | LIM domain binding 3                                                                                                                       |
| 1419040_at              | 41.10               | 0.366211A            | 438.00              | 0.001953             | P                 | 396.90                     | 4.29                    | 0.000552 Cyp2d22       | cytochrome P450, 2d22                                                                                                                      |
| 1425439_a_at            | 41.30               | 0.696289A            | 264.40              | 0.023926             | P                 | 223.10                     | 4.29                    | 0.001651 Slc41a3       | RIKEN cDNA 10106P1906 gene                                                                                                                 |
| 1427312_at              | 49.20               | 0.696289A            | 175.40              | 0.00742              | P                 | 132.20                     | 4.29                    | 0.002049 Cmya5         | RIKEN cDNA B130022C14 gene                                                                                                                 |
| 1417716_at              | 34.60               | 0.601074A            | 167.30              | 0.018555             | P                 | 132.70                     | 4.00                    | 0.001077 Golt2         | glutamate oxaloacetate transaminase 2, mitochondrial                                                                                       |
| 1420992_at              | 61.80               | 0.432373A            | 261.00              | 0.001221             | P                 | 199.20                     | 4.00                    | 0.000035 Ankr1         | cardiac responsive adriamycin protein                                                                                                      |
| 1423145_a_at            | 228.90              | 0.010742P            | 1124.30             | 0.000732             | P                 | 895.40                     | 4.00                    | 0.000023 Tcap          | titin-cap                                                                                                                                  |
| 1450077_at              | 36.80               | 0.753996A            | 194.80              | 0.01416              | P                 | 158.00                     | 4.00                    | 0.00004 Chd1           | chromodomain helicase DNA binding protein 1                                                                                                |
| 1415937_s_at            | 49.20               | 0.66327A             | 217.50              | 0.000244             | P                 | 168.30                     | 3.73                    | 0.001336 Ptdc9ip       | progammated cell death 9 interacting protein                                                                                               |
| 1416551_at              | 2016.10             | 0.000244P            | 8077.90             | 0.000244             | P                 | 6061.80                    | 3.73                    | 0.00002 Atp2a2         | ATPase, Ca++ transporting, cardiac muscle, slow twitch 2                                                                                   |
| 1417619_at              | 80.50               | 0.533936A            | 213.50              | 0.056152             | M                 | 133.00                     | 3.73                    | 0.001201 Gadd45ip1     | RIKEN cDNA 2310040G17 gene                                                                                                                 |
| 1424825_a_at            | 103.30              | 0.344473A            | 335.00              | 0.010742             | P                 | 231.70                     | 3.73                    | 0.000618 Glycam1       | glycosylation dependent cell adhesion molecule 1                                                                                           |
| 1436616_at              | 109.40              | 0.19458A             | 436.60              | 0.00293              | P                 | 327.20                     | 3.73                    | 0.004481 R74740        | ESTs, Highly similar to 2118318A promyelocyte leukemia Zn finger protein [Mus musculus] (M.musculus)                                       |
| 1442025_a_at            | 39.60               | 0.423096A            | 143.80              | 0.001953             | P                 | 104.20                     | 3.73                    | 0.000865 ---           | ESTs, Highly similar to 2118318A promyelocyte leukemia Zn finger protein [Mus musculus] (M.musculus)                                       |
| 1450052_at              | 76.70               | 0.432373A            | 252.20              | 0.018555             | P                 | 175.50                     | 3.73                    | 0.00225 Kif2a          | kinesin family member 2A                                                                                                                   |
| 1450970_at              | 62.50               | 0.303711A            | 315.20              | 0.001953             | P                 | 252.70                     | 3.73                    | 0.003355 Got1          | glutamate oxaloacetate transaminase 1, soluble                                                                                             |
| 1452363_a_at            | 603.70              | 0.00293P             | 2917.70             | 0.001221             | P                 | 2314.00                    | 3.73                    | 0.00003 Atp2a2         | ATPase, Ca++ transporting, cardiac muscle, slow twitch 2                                                                                   |
| 1455719_at              | 493.40              | 0.001953P            | 2602.10             | 0.000244             | P                 | 2098.70                    | 3.73                    | 0.00002 Tubb5          | RIKEN cDNA B130022C14 gene                                                                                                                 |
| 1460332_at              | 137.90              | 0.01416P             | 564.90              | 0.00415              | P                 | 427.00                     | 3.73                    | 0.000189 Pln           | phospholamban                                                                                                                              |
| 1416926_at              | 260.50              | 0.001953P            | 1137.00             | 0.000244             | P                 | 876.50                     | 3.48                    | 0.00002 Trp53mp1       | stress induced protein                                                                                                                     |
| 1417851_at              | 116.10              | 0.366211A            | 257.40              | 0.056152             | M                 | 141.30                     | 3.48                    | 0.00225 Cxcl13         | chemokine (C-X-C motif) ligand 13                                                                                                          |
| 1420645_s_at            | 887.50              | 0.000244P            | 2674.50             | 0.000244             | P                 | 1787.00                    | 3.48                    | 0.00002 Mup1 // Mup2   | major urinary protein 1                                                                                                                    |
| 1422529_s_at            | 64.40               | 0.533936A            | 238.10              | 0.064453             | M                 | 173.70                     | 3.48                    | 0.001486 Casq2         | casquestrin 2                                                                                                                              |
| 1427145_at              | 84.00               | 0.27417A             | 335.00              | 0.018555             | P                 | 251.00                     | 3.48                    | 0.00249 Iqsec1         | Mus musculus adult retina cDNA, RIKEN full-length enriched library, clone:A930035E24 product:hypospethelial protein, full insert sequence. |
| 1428586_at              | 37.90               | 0.72583A             | 149.60              | 0.01416              | P                 | 111.70                     | 3.48                    | 0.000865 Tmem41b       | DNA segment, Chr 7, ERATO Doi 743, expressed                                                                                               |
| 1429356_s_at            | 58.20               | 0.533936A            | 261.90              | 0.008057             | P                 | 203.70                     | 3.48                    | 0.003355 Ggpi1         | RIKEN cDNA 9530089B04 gene                                                                                                                 |
| 1450931_at              | 43.30               | 0.601074A            | 164.60              | 0.023926             | P                 | 121.30                     | 3.48                    | 0.000966 LOC670309     | expressed sequence AA959601                                                                                                                |
| 1417703_at              | 28.30               | 0.533936A            | 140.60              | 0.023926             | P                 | 112.30                     | 3.25                    | 0                      |                                                                                                                                            |

|              |         |           |          |          |   |          |      |          |               |                                                                                                                                                    |
|--------------|---------|-----------|----------|----------|---|----------|------|----------|---------------|----------------------------------------------------------------------------------------------------------------------------------------------------|
| 1420078_at   | 52.50   | 0.696289A | 155.10   | 0.037598 | P | 102.60   | 2.46 | 0.001336 | ---           | EST, Weakly similar to CASR_MOUSE Extracellular calcium-sensing receptor precursor (CaSR) (Parathyroid Cell calcium-sensing receptor) [M.musculus] |
| 1424683_at   | 314.60  | 0.000244P | 727.90   | 0.000244 | P | 413.30   | 2.46 | 0.00003  | 1810015C04Rik | RIKEN cDNA 1810015C04 gene                                                                                                                         |
| 1426671_a_at | 71.10   | 0.246094A | 217.80   | 0.001221 | P | 146.70   | 2.46 | 0.000088 | Rbm39         | RNA-binding region (RNP1, RRM) containing 2                                                                                                        |
| 1427405_s_at | 45.20   | 0.753906A | 152.40   | 0.018555 | P | 107.20   | 2.46 | 0.002753 | Rab11fp5      | DNA segment, Chr.6, ERAT, DOI 32, expressed                                                                                                        |
| 1434585_at   | 150.90  | 0.246094A | 335.50   | 0.00293  | P | 184.60   | 2.46 | 0.001336 | 2210038L17Rik | RIKEN cDNA 2210038L17 gene                                                                                                                         |
| 1434832_at   | 276.40  | 0.037598P | 614.80   | 0.00415  | P | 338.40   | 2.46 | 0.000438 | Foxo3a        | RIKEN cDNA 1110048B16 gene                                                                                                                         |
| 1435862_at   | 118.20  | 0.303711A | 396.70   | 0.000244 | P | 278.50   | 2.46 | 0.001201 | Son           | downstream neighbor of SON                                                                                                                         |
| 1456098_a_at | 54.80   | 0.567627A | 173.40   | 0.030273 | P | 118.60   | 2.46 | 0.004073 | Eimo2         | engulfment and cell motility 2, ced-12 homolog (C. elegans)                                                                                        |
| 1456733_x_at | 550.60  | 0.001953P | 1575.00  | 0.000244 | P | 1024.40  | 2.46 | 0.000389 | Serpinh1      | serine (or cysteine) proteinase inhibitor, clade H, member 1                                                                                       |
| 1460189_at   | 166.90  | 0.095215A | 433.90   | 0.001221 | P | 267.00   | 2.46 | 0.000273 | Wdr23         | RIKEN cDNA 0710008A13 gene                                                                                                                         |
| 1471969_at   | 291.60  | 0.096152M | 549.80   | 0.001221 | P | 298.00   | 2.30 | 0.000035 | Fbcw3c1       | RIKEN cDNA 2310046N15 gene                                                                                                                         |
| 1418854_at   | 218.10  | 0.095215A | 434.60   | 0.000244 | P | 216.50   | 2.30 | 0.003355 | Birc2         | baculoviral IAP repeat-containing 3                                                                                                                |
| 1423475_at   | 117.80  | 0.219482A | 278.20   | 0.001221 | P | 160.40   | 2.30 | 0.000692 | Cnm2          | cyclin M2                                                                                                                                          |
| 1426463_at   | 143.80  | 0.00415P  | 382.60   | 0.000244 | P | 238.80   | 2.30 | 0.001201 | Gphn          | gephyrin                                                                                                                                           |
| 1433711_s_at | 250.90  | 0.008057P | 529.10   | 0.000244 | P | 278.50   | 2.30 | 0.000027 | Seen1         | RIKEN cDNA 1110002G11 gene                                                                                                                         |
| 1438177_x_at | 1640.80 | 0.000244P | 4945.80  | 0.000244 | P | 3305.00  | 2.30 | 0.000046 | Entpd4        | lysosomal apyrase-like 1                                                                                                                           |
| 1454872_at   | 139.20  | 0.056152M | 304.70   | 0.00293  | P | 165.50   | 2.30 | 0.004071 | k             | RIKEN cDNA B230308N11 gene                                                                                                                         |
| 1415994_at   | 1820.50 | 0.000244P | 3786.70  | 0.000244 | P | 1966.20  | 2.14 | 0.00002  | Cyp2e1        | cytochrome P450, 2e1, ethanol inducible                                                                                                            |
| 1416020_a_at | 214.80  | 0.001953P | 597.00   | 0.001221 | P | 382.20   | 2.14 | 0.000273 | Atp5g1        | ATP synthase, H+ transporting, mitochondrial F0 complex, subunit c (subunit 9), isoform 1                                                          |
| 1422557_s_at | 538.90  | 0.000244P | 11657.90 | 0.000244 | P | 6269.00  | 2.14 | 0.00002  | Mt1           | metallothionein 1                                                                                                                                  |
| 1426516_a_at | 533.40  | 0.005859P | 1789.40  | 0.000732 | P | 1256.00  | 2.14 | 0.000027 | Lpin1         | lipin 1                                                                                                                                            |
| 1426993_at   | 114.40  | 0.129639A | 269.90   | 0.000244 | P | 155.50   | 2.14 | 0.000618 | Xpr1          | xenotropic and polytropic retrovirus receptor 1                                                                                                    |
| 1451152_a_at | 98.20   | 0.219482A | 198.80   | 0.001221 | P | 100.60   | 2.14 | 0.003041 | Atp1b1        | ATPase, Na(+)/K+ transporting, beta 1 polypeptide                                                                                                  |
| 1452418_at   | 8360.40 | 0.000244P | 18096.20 | 0.000244 | P | 9735.80  | 2.14 | 0.000008 | 1200016E24Rik | RIKEN cDNA 1200016E24 gene                                                                                                                         |
| 1417629_at   | 155.10  | 0.023926P | 322.50   | 0.000244 | P | 167.40   | 2.00 | 0.000389 | Prodh         | proline dehydrogenase                                                                                                                              |
| 1417867_at   | 7953.10 | 0.000244P | 17506.90 | 0.000244 | P | 9553.80  | 2.00 | 0.00002  | Cfd           | adipin                                                                                                                                             |
| 1423181_s_at | 155.10  | 0.149658A | 333.70   | 0.000244 | P | 176.60   | 2.00 | 0.001336 | Cins1a        | chloride channel, nucleotide-sensitive, 1A                                                                                                         |
| 1425233_at   | 177.20  | 0.046143P | 378.50   | 0.001953 | P | 201.30   | 2.00 | 0.000774 | 2210407C18Rik | RIKEN cDNA 2210407C18 gene                                                                                                                         |
| 1426258_at   | 321.00  | 0.001953P | 539.90   | 0.000244 | P | 218.90   | 2.00 | 0.001486 | Sor1          | sortilin-related receptor, LDLR class A repeats-containing                                                                                         |
| 1426864_a_at | 1203.70 | 0.000244P | 1847.90  | 0.000244 | P | 644.20   | 2.00 | 0.000008 | Ncam1         | neural cell adhesion molecule 1                                                                                                                    |
| 1427177_at   | 263.10  | 0.030273P | 627.80   | 0.001221 | P | 364.70   | 2.00 | 0.000492 | Fyco1         | FYVE and coiled-coil domain containing 1                                                                                                           |
| 1427932_s_at | 7828.20 | 0.000732P | 16793.80 | 0.000244 | P | 8965.60  | 2.00 | 0.000023 | k             | 1200003H10Rik<br>1200015M12Rik<br>1200016E24Rik<br>1200040M12Rik<br>E430024C06Ri                                                                   |
| 1428289_at   | 995.70  | 0.000244P | 2914.40  | 0.000732 | P | 1918.70  | 2.00 | 0.004481 | Klf9          | Kruppel-like factor 9                                                                                                                              |
| 1429144_at   | 476.90  | 0.001953P | 1078.30  | 0.000244 | P | 601.40   | 2.00 | 0.000101 | Prex4         | RIKEN cDNA 2310032D16 gene                                                                                                                         |
| 1430354_x_at | 81.80   | 0.274117A | 193.50   | 0.01416  | P | 111.70   | 2.00 | 0.003699 | Scy1          | SCY1-like 1 (S. cerevisiae)                                                                                                                        |
| 1434643_at   | 269.70  | 0.008057P | 545.60   | 0.000244 | P | 275.90   | 2.00 | 0.000438 | Tb1x          | transducin (beta)-like 1 X-linked                                                                                                                  |
| 1448181_at   | 272.90  | 0.171387A | 451.50   | 0.000244 | P | 178.60   | 2.00 | 0.000774 | Klf15         | Kruppel-like factor 15                                                                                                                             |
| 1448286_at   | 1383.90 | 0.000732P | 3621.10  | 0.000244 | P | 2237.20  | 2.00 | 0.00002  | Hsd17b10      | hydroxyacyl-Coenzyme A dehydrogenase type II                                                                                                       |
| 1449038_at   | 990.00  | 0.000244P | 1778.10  | 0.000244 | P | 788.10   | 2.00 | 0.00002  | Hsd11b1       | hydroxysteroid 11-beta dehydrogenase 1                                                                                                             |
| 1451543_at   | 210.00  | 0.037598P | 376.90   | 0.001221 | P | 168.90   | 2.00 | 0.003699 | Fbcw21        | similar to F-box only protein 21, isoform 1; F-box protein 21                                                                                      |
| 1453238_s_at | 1965.50 | 0.000732P | 3895.20  | 0.000732 | P | 1929.70  | 2.00 | 0.00006  | k             | 3930401B19Rik<br>A130040M12Ri<br>E430024C06Ri                                                                                                      |
| 1454696_at   | 1322.60 | 0.000244P | 3434.00  | 0.000244 | P | 2111.40  | 2.00 | 0.00002  | Gnb1          | guanine nucleotide binding protein, beta 1                                                                                                         |
| 1454706_at   | 162.50  | 0.01416P  | 337.50   | 0.000732 | P | 175.00   | 2.00 | 0.000492 | Uvrq          | RIKEN cDNA 953003D02 gene                                                                                                                          |
| 1455892_x_at | 222.10  | 0.030273P | 642.60   | 0.001953 | P | 420.50   | 2.00 | 0.000167 | LOC676636     | expressed sequence AW125446                                                                                                                        |
| 1415698_at   | 304.30  | 0.001953P | 620.90   | 0.001221 | P | 316.60   | 1.87 | 0.004073 | Golp2         | demethyl-Q 7                                                                                                                                       |
| 1418665_at   | 397.30  | 0.023926P | 819.70   | 0.000732 | P | 422.40   | 1.87 | 0.001832 | Cox7          | P450 (cytochrome) oxidoreductase                                                                                                                   |
| 1416933_at   | 709.10  | 0.018555P | 1741.10  | 0.000244 | P | 709.50   | 1.87 | 0.00002  | Por           | nuclear receptor binding factor 1                                                                                                                  |
| 1417097_at   | 380.40  | 0.01416P  | 821.30   | 0.001953 | P | 533.70   | 1.87 | 0.002753 | Meacr         | ubiquitin fusion degradation 1 like                                                                                                                |
| 1418087_at   | 215.80  | 0.018555P | 371.10   | 0.000244 | P | 155.30   | 1.87 | 0.003041 | Ufd1          | casein kinase II, alpha 1 related sequence 4                                                                                                       |
| 1419036_at   | 200.00  | 0.046143P | 446.90   | 0.001221 | P | 246.90   | 1.87 | 0.001077 | Csk2a1        | cytochrome P450, 2d22                                                                                                                              |
| 1419039_at   | 120.50  | 0.171387A | 227.50   | 0.046143 | P | 107.00   | 1.87 | 0.002753 | Cyp2d22       | regulator of G-protein signaling 2                                                                                                                 |
| 1419247_at   | 592.90  | 0.001953P | 1132.00  | 0.000732 | P | 539.10   | 1.87 | 0.000189 | Rgs2          | cytochrome P450, 2d21                                                                                                                              |
| 1419547_at   | 145.70  | 0.274117A | 325.20   | 0.005859 | P | 179.50   | 1.87 | 0.001336 | Fahd1         | RIKEN cDNA 1110025H10 gene                                                                                                                         |
| 1420887_a_at | 291.40  | 0.056152M | 452.70   | 0.001953 | P | 161.30   | 1.87 | 0.002651 | Bcl2l1        | Bcl2-like                                                                                                                                          |
| 1424721_at   | 244.20  | 0.023926P | 358.60   | 0.000244 | P | 114.40   | 1.87 | 0.003355 | Mfap3         | similar to Microfilin-associated glycoprotein 3 precursor                                                                                          |
| 1426555_at   | 1140.20 | 0.000244P | 2010.90  | 0.000244 | P | 870.70   | 1.87 | 0.00002  | Scpep1        | retinoid-inducible serine carboxypeptidase                                                                                                         |
| 1426594_a_at | 219.40  | 0.056152M | 531.90   | 0.001953 | P | 312.50   | 1.87 | 0.000492 | Sord          | sorbitol dehydrogenase 1                                                                                                                           |
| 1426951_at   | 388.80  | 0.01416P  | 928.30   | 0.001221 | P | 530.50   | 1.87 | 0.000492 | Crim1         | cysteine-rich motor neuron 1                                                                                                                       |
| 1427345_a_at | 1648.60 | 0.00293P  | 3879.90  | 0.000732 | P | 2231.30  | 1.87 | 0.000273 | Sult1a1       | sulfotransferase family 1A, phenol-preferring, member 1                                                                                            |
| 1428071_at   | 451.20  | 0.001221P | 745.80   | 0.000244 | P | 294.60   | 1.87 | 0.001336 | 1110038D17Rik | RIKEN cDNA 1110038D17 gene                                                                                                                         |
| 1428267_at   | 261.50  | 0.005859P | 470.30   | 0.000732 | P | 208.80   | 1.87 | 0.000035 | Dhx40         | RIKEN cDNA 2410016C14 gene                                                                                                                         |
| 1428716_at   | 192.50  | 0.023926P | 481.90   | 0.001953 | P | 289.40   | 1.87 | 0.000167 | Sctoa6        | RIKEN cDNA 8430417G17 gene                                                                                                                         |
| 1431302_a_at | 580.10  | 0.001953P | 1085.50  | 0.000732 | P | 505.40   | 1.87 | 0.000035 | Nudt7         | nudix (nucleoside diphosphate linked moiety X)-type motif 7                                                                                        |
| 1434831_a_at | 489.70  | 0.00293P  | 1016.00  | 0.010742 | P | 526.30   | 1.87 | 0.001201 | Foxo3a        | RIKEN cDNA 1110048B16 gene                                                                                                                         |
| 1434998_at   | 1667.00 | 0.001221P | 3132.70  | 0.000244 | P | 1465.70  | 1.87 | 0.000078 | Igapp1        | Mus musculus 11 days embryo head cDNA, RIKEN full-length enriched library, clone:6230409N14 product:unknown EST, full insert sequence.             |
| 1435386_at   | 900.30  | 0.000732P | 1821.00  | 0.000244 | P | 920.70   | 1.87 | 0.000113 | Vwf           | von Willebrand factor homolog                                                                                                                      |
| 1436884_x_at | 281.80  | 0.030273P | 496.50   | 0.001221 | P | 214.70   | 1.87 | 0.002032 | Ewsr1         | Ewing sarcoma homolog                                                                                                                              |
| 1439032_at   | 61.10   | 0.685527A | 169.80   | 0.001953 | P | 108.70   | 1.87 | 0.000027 | Cep27         | tumor necrosis factor receptor superfamily, member 19                                                                                              |
| 1448237_x_at | 2586.40 | 0.000244P | 4330.70  | 0.000244 | P | 1744.30  | 1.87 | 0.000113 | Ldhb          | lactate dehydrogenase 2, B chain                                                                                                                   |
| 1448825_at   | 193.80  | 0.080596A | 507.90   | 0.00293  | P | 314.10   | 1.87 | 0.001486 | Pdk2          | pyruvate dehydrogenase kinase, isoenzyme 2                                                                                                         |
| 1451554_a_at | 321.40  | 0.00415P  | 512.70   | 0.000244 | P | 191.30   | 1.87 | 0.00225  | Aph1a         | hypothetical protein IMG27221                                                                                                                      |
| 1451716_at   | 118.30  | 0.19458A  | 318.20   | 0.030273 | P | 199.90   | 1.87 | 0.002753 | Malb          | v-maf musculoaponeurotic fibrosarcoma oncogene family, protein B (avian)                                                                           |
| 1452283_at   | 159.20  | 0.466064A | 353.20   | 0.01416  | P | 194.00   | 1.87 | 0.000492 | Rassf8        | expressed sequence AW123240                                                                                                                        |
| 1452308_a_at | 1271.60 | 0.000244P | 3378.70  | 0.000244 | P | 2107.10  | 1.87 | 0.000068 | Atp1a2        | expressed sequence AW006054                                                                                                                        |
| 1452506_a_at | 201.00  | 0.030273P | 375.60   | 0.000244 | P | 174.60   | 1.87 | 0.00006  | Ilkap         | RIKEN cDNA 0710007A14 gene                                                                                                                         |
| 1452900_a_at | 797.40  | 0.008057P | 1102.60  | 0.000244 | P | 305.20   | 1.87 | 0.00002  | Plac9         | Mus musculus, clone MGC-41689 IMAGE:1348266, mRNA, complete cds                                                                                    |
| 1453851_a_at | 1165.50 | 0.000244P | 2147.70  | 0.000244 | P | 982.20   | 1.87 | 0.000101 | Gadd45g       | growth arrest and DNA-damage-inducible 45 gamma                                                                                                    |
| 1455956_x_at | 413.20  | 0.00293P  | 733.20   | 0.001221 | P | 320.00   | 1.87 | 0.00249  | Cond2         | cyclin D2                                                                                                                                          |
| 1456341_a_at | 742.10  | 0.001953P | 1086.10  | 0.001953 | P | 380.00   | 1.87 | 0.000552 | Klf9          | Kruppel-like factor 9                                                                                                                              |
| 1416271_at   | 287.90  | 0.001221P | 609.10   | 0.000732 | P | 321.20   | 1.74 | 0.001486 | Pep           | p53 apoptosis effector related to Pmp22                                                                                                            |
| 1416316_at   | 1248.40 | 0.000244P | 2469.80  | 0.000244 | P | 1221.40  | 1.74 | 0.00003  | Sic27a2       | solute carrier family 27 (fatty acid transporter), member 2                                                                                        |
| 1416409_at   | 721.00  | 0.000732P | 1223.60  | 0.000244 | P | 502.60   | 1.74 | 0.000068 | Acox1         | acyl-Coenzyme A oxidase 1, palmitoyl                                                                                                               |
| 1416856_at   | 154.80  | 0.018555P | 362.70   | 0.000244 | P | 207.90   | 1.74 | 0.000241 | 3230401D17Rik | RIKEN cDNA 3230401D17 gene                                                                                                                         |
| 1417103_at   | 938.10  | 0.001953P | 2270.30  | 0.001221 | P | 1332.20  | 1.74 | 0.000052 | Ddt           | D-dispathrome tautomerase                                                                                                                          |
| 1417815_a_at | 424.30  | 0.008057P | 950.10   | 0.000732 | P | 525.80</ |      |          |               |                                                                                                                                                    |

|              |          |          |   |          |          |   |          |       |          |                                                                                                     |                                                                                                |
|--------------|----------|----------|---|----------|----------|---|----------|-------|----------|-----------------------------------------------------------------------------------------------------|------------------------------------------------------------------------------------------------|
| 1416101_a_at | 727.80   | 0.000244 | P | 1102.10  | 0.000244 | P | 374.30   | 1.62  | 0.00003  | Hist1h1c                                                                                            | histone 1, H1c                                                                                 |
| 1416365_at   | 1109.70  | 0.000244 | P | 1859.80  | 0.000244 | P | 750.10   | 1.62  | 0.000189 | Hsp90ab1                                                                                            | heat shock protein 1, beta                                                                     |
| 1416612_at   | 860.20   | 0.001221 | P | 1767.00  | 0.000244 | P | 906.80   | 1.62  | 0.00003  | Cyp1b1                                                                                              | cytochrome P450, 1b1, benz[a]anthracene inducible                                              |
| 1416660_at   | 440.50   | 0.111572 | A | 653.50   | 0.037598 | P | 213.00   | 1.62  | 0.000065 | Slc3s10                                                                                             | eukaryotic translation initiation factor 3                                                     |
| 1417012_at   | 152.10   | 0.037598 | P | 344.60   | 0.001221 | P | 192.50   | 1.62  | 0.000341 | Sdc2                                                                                                | syndecan 2                                                                                     |
| 1417614_at   | 92.30    | 0.389926 | A | 269.50   | 0.010742 | P | 177.20   | 1.62  | 0.001077 | Kcm                                                                                                 | creatine kinase, muscle                                                                        |
| 1417654_at   | 4367.60  | 0.000244 | P | 7042.60  | 0.000244 | P | 2675.00  | 1.62  | 0.000241 | Sdc4                                                                                                | syndecan 4                                                                                     |
| 1417981_at   | 261.70   | 0.023296 | P | 745.40   | 0.008057 | P | 483.70   | 1.62  | 0.000307 | Ins2g                                                                                               | RIKEN cDNA 2900053111 gene                                                                     |
| 1420624_a_at | 510.50   | 0.005519 | P | 1062.50  | 0.030293 | P | 468.50   | 1.62  | 0.000438 | Vamp8                                                                                               | vesicle-associated membrane protein 8                                                          |
| 1422811_at   | 388.90   | 0.00293  | P | 699.40   | 0.001953 | P | 310.50   | 1.62  | 0.001336 | Slc27a1                                                                                             | solute carrier family 27 (fatty acid transporter), member 1                                    |
| 1423667_at   | 1017.30  | 0.000244 | P | 1580.30  | 0.000244 | P | 563.00   | 1.62  | 0.000027 | Mat2a                                                                                               | methionine adenosyltransferase II, alpha                                                       |
| 1425281_a_at | 496.50   | 0.005859 | P | 924.30   | 0.000244 | P | 427.80   | 1.62  | 0.00002  | Tsc22d3                                                                                             | glucocorticoid-induced leucine zipper                                                          |
| 1425364_a_at | 634.40   | 0.001953 | P | 1008.90  | 0.000244 | P | 374.50   | 1.62  | 0.000966 | Slc3a2                                                                                              | solute carrier family 3 (activators of dibasic and neutral amino acid transport), member 2     |
| 1425559_a_at | 1799.20  | 0.000244 | P | 2220.00  | 0.000732 | P | 420.80   | 1.62  | 0.000273 | Acsm3                                                                                               | SA rat hypertension-associated homolog                                                         |
| 1429453_a_at | 502.80   | 0.023296 | P | 772.40   | 0.000244 | P | 269.60   | 1.62  | 0.000865 | Mppl55                                                                                              | mitochondrial ribosomal protein L55                                                            |
| 1433816_at   | 1116.60  | 0.000244 | P | 1464.90  | 0.000244 | P | 348.30   | 1.62  | 0.00006  | Mcart1                                                                                              | fibrosin                                                                                       |
|              |          |          |   |          |          |   |          |       |          | 1200015M12Rk                                                                                        |                                                                                                |
|              |          |          |   |          |          |   |          |       |          | k //                                                                                                |                                                                                                |
|              |          |          |   |          |          |   |          |       |          | 1200016E24Rk                                                                                        |                                                                                                |
|              |          |          |   |          |          |   |          |       |          | //                                                                                                  |                                                                                                |
|              |          |          |   |          |          |   |          |       |          | A130040M12Rk                                                                                        |                                                                                                |
|              |          |          |   |          |          |   |          |       |          | k //                                                                                                |                                                                                                |
|              |          |          |   |          |          |   |          |       |          | E430024C06Ri                                                                                        |                                                                                                |
| 1435137_s_at | 1507.60  | 0.001953 | P | 7185.60  | 0.000732 | P | 2168.00  | 1.62  | 0.000035 | k                                                                                                   |                                                                                                |
| 1448104_at   | 540.80   | 0.000732 | P | 1126.70  | 0.000244 | P | 585.90   | 1.62  | 0.000088 | Aldh6a1                                                                                             | RIKEN cDNA 1110038105 gene                                                                     |
| 1448330_at   | 1794.00  | 0.000244 | P | 3184.30  | 0.000244 | P | 1390.30  | 1.62  | 0.000101 | Gstm1                                                                                               | glutathione S-transferase, mu 1                                                                |
| 1448425_at   | 1023.30  | 0.000732 | P | 1561.20  | 0.000732 | P | 537.90   | 1.62  | 0.002032 | Eif3s10                                                                                             | eukaryotic translation initiation factor 3                                                     |
| 1448842_at   | 6147.40  | 0.000244 | P | 9497.80  | 0.000244 | P | 3350.40  | 1.62  | 0.000068 | Cdo1                                                                                                | cysteine dioxygenase 1, cytosolic                                                              |
| 1449396_at   | 1133.90  | 0.001953 | P | 1905.40  | 0.000244 | P | 765.50   | 1.62  | 0.00002  | Acsc3                                                                                               | amine oxidase, cytosol containing 3                                                            |
| 1451669_at   | 1066.30  | 0.000244 | P | 1523.00  | 0.000244 | P | 456.70   | 1.62  | 0.003355 | Ppm1b                                                                                               | protein phosphatase 1B, magnesium dependent, beta isoform                                      |
| 1451969_s_at | 208.20   | 0.056152 | M | 420.60   | 0.000244 | P | 212.40   | 1.62  | 0.000307 | Parp3                                                                                               | ADP-ribosyltransferase (NAD+ poly (ADP-ribose polymerase)-like 3                               |
| 1452823_at   | 620.60   | 0.000244 | P | 901.90   | 0.000244 | P | 281.30   | 1.62  | 0.001336 | Gstk1                                                                                               | RIKEN cDNA 0610025119 gene                                                                     |
| 1416163_a_at | 3620.70  | 0.000244 | P | 5236.60  | 0.000244 | P | 1675.90  | 1.52  | 0.000214 | Ldhb                                                                                                | lactate dehydrogenase 2, B chain                                                               |
| 1416292_at   | 175.90   | 0.000244 | P | 2992.80  | 0.00057  | P | 107.30   | 1.52  | 0.000244 | Prk3                                                                                                | PK508 binding protein 3                                                                        |
| 1416319_at   | 381.50   | 0.018555 | P | 547.00   | 0.00415  | P | 165.50   | 1.52  | 0.001651 | Adk                                                                                                 | expressed sequence A1987814                                                                    |
| 1416383_a_at | 789.50   | 0.001953 | P | 1429.10  | 0.001953 | P | 639.60   | 1.52  | 0.003039 | Pcx                                                                                                 | pyruvate carboxylase                                                                           |
| 1416617_at   | 596.20   | 0.001953 | P | 720.00   | 0.000244 | P | 123.80   | 1.52  | 0.003355 | Acsc1                                                                                               | acetyl-Coenzyme A synthetase 2 (AMP forming)-like                                              |
| 1416846_a_at | 266.40   | 0.01416  | P | 371.80   | 0.000244 | P | 105.40   | 1.52  | 0.000346 | Pdcm3                                                                                               | sema4 cytoplasmic domain associated protein 3                                                  |
| 1416859_a_at | 175.90   | 0.046143 | P | 283.20   | 0.00057  | P | 107.30   | 1.52  | 0.004071 | Fkbp3                                                                                               | FK506 binding protein 3                                                                        |
| 1417190_at   | 877.70   | 0.000244 | P | 1535.50  | 0.000244 | P | 657.80   | 1.52  | 0.000167 | Pbe1f                                                                                               | pre-B-cell colony-enhancing factor                                                             |
| 1417227_at   | 985.30   | 0.000244 | P | 1553.10  | 0.000244 | P | 567.80   | 1.52  | 0.000273 | Mccc1                                                                                               | methylcrotonyl-Coenzyme A carboxylase 1 (alpha)                                                |
| 1418238_at   | 497.30   | 0.001953 | P | 1185.00  | 0.000244 | P | 687.70   | 1.52  | 0.000052 | lvd                                                                                                 | isovaleryl coenzyme A dehydrogenase                                                            |
| 1420089_at   | 514.10   | 0.001221 | P | 970.30   | 0.001221 | P | 456.20   | 1.52  | 0.000346 | Nrkbia                                                                                              | nuclear factor of kappa light chain gene enhancer in B-cells                                   |
| 1420772_a_at | 373.80   | 0.01416  | P | 845.10   | 0.001221 | P | 471.30   | 1.52  | 0.000147 | Tsc22d3                                                                                             | glucocorticoid-induced leucine zipper                                                          |
| 1421014_a_at | 338.00   | 0.000244 | P | 638.60   | 0.000244 | P | 300.60   | 1.52  | 0.000114 | Cybb                                                                                                | citrate lyase beta like                                                                        |
| 1421321_a_at | 597.80   | 0.001221 | P | 843.80   | 0.001221 | P | 246.00   | 1.52  | 0.002753 | Net1                                                                                                | neuroepithelial cell transforming gene 1                                                       |
| 1423114_at   | 155.20   | 0.056152 | M | 265.80   | 0.000244 | P | 116.60   | 1.52  | 0.001832 | Ube2d3                                                                                              | RIKEN cDNA 1100001F19 gene                                                                     |
| 1423119_at   | 1216.40  | 0.001953 | P | 1579.70  | 0.000732 | P | 363.30   | 1.52  | 0.000389 | Rsh2b                                                                                               | RIKEN cDNA 4930524H12 gene                                                                     |
|              |          |          |   |          |          |   |          |       |          | phosphoribosylaminimidazole carboxylase, phosphoribosylaminimidazole, succinocarboxamide synthetase |                                                                                                |
| 1423564_a_at | 455.90   | 0.008057 | P | 610.50   | 0.00293  | P | 154.60   | 1.52  | 0.003699 | Paics                                                                                               | RIKEN cDNA 1180017B18 gene                                                                     |
| 1423854_a_at | 223.60   | 0.01416  | P | 1098.30  | 0.001953 | P | 867.20   | 1.52  | 0.000346 | Ras11b                                                                                              | RIKEN cDNA 1810045K07 gene                                                                     |
| 1424039_at   | 1395.00  | 0.000732 | P | 2104.80  | 0.000244 | P | 709.80   | 1.52  | 0.000346 | Mem66                                                                                               | RIKEN cDNA 633055B14 gene                                                                      |
| 1424393_s_at | 511.90   | 0.00415  | P | 925.10   | 0.00293  | P | 413.20   | 1.52  | 0.001832 | Adhfe1                                                                                              | RIKEN cDNA 633055B14 gene                                                                      |
| 1424988_at   | 590.60   | 0.010742 | P | 992.60   | 0.000732 | P | 402.00   | 1.52  | 0.000618 | Mylip                                                                                               | hypothetical protein MGC11702                                                                  |
| 1425196_a_at | 534.50   | 0.01416  | P | 901.50   | 0.008057 | P | 367.00   | 1.52  | 0.000273 | Hint2                                                                                               | RIKEN cDNA 1190005L05 gene                                                                     |
| 1426236_a_at | 2747.20  | 0.000244 | P | 4227.10  | 0.000244 | P | 1479.90  | 1.52  | 0.000078 | Glul                                                                                                | glutamate-aminomethylase (glutamine synthase)                                                  |
| 1426689_at   | 5320.20  | 0.000244 | P | 8527.90  | 0.000244 | P | 3207.70  | 1.52  | 0.000052 | Scha                                                                                                | succinate dehydrogenase complex, subunit A, flavoprotein (Fp)                                  |
| 1426819_at   | 332.10   | 0.037598 | P | 578.60   | 0.001953 | P | 245.50   | 1.52  | 0.000052 | Hipk3                                                                                               | Mus musculus, clone IMAGE:3595053, mRNA                                                        |
| 1427672_a_at | 246.60   | 0.010742 | P | 452.80   | 0.001953 | P | 206.20   | 1.52  | 0.000774 | Ulx                                                                                                 | ubiquitously transcribed tetratricopeptide repeat gene, X chromosome                           |
| 1428306_at   | 632.10   | 0.001953 | P | 1116.00  | 0.000244 | P | 483.90   | 1.52  | 0.000046 | Dhd4                                                                                                | RIKEN cDNA 5830413E08 gene                                                                     |
| 1431028_a_at | 805.60   | 0.000244 | P | 1218.10  | 0.000244 | P | 362.10   | 1.52  | 0.001332 | Dhps                                                                                                | phosphoenolpyruvate kinase 1                                                                   |
| 1433666_s_at | 390.40   | 0.001953 | P | 570.10   | 0.000244 | P | 179.70   | 1.52  | 0.000774 | Vps41                                                                                               | vacuolar protein sorting 41 (yeast)                                                            |
| 1434181_at   | 1036.60  | 0.000244 | P | 1777.20  | 0.000244 | P | 740.60   | 1.52  | 0.003699 | Plekhc1                                                                                             | hypothetical protein MGC36305                                                                  |
| 1434694_a_at | 2241.00  | 0.000244 | P | 3175.00  | 0.000244 | P | 934.00   | 1.52  | 0.000023 | Lrcc8a                                                                                              | Mus musculus, clone IMAGE:5290106, mRNA                                                        |
| 1434927_at   | 316.70   | 0.005859 | P | 643.40   | 0.000732 | P | 326.70   | 1.52  | 0.000341 | Hsp7                                                                                                | heat shock protein family, member 7 (cardiovascular)                                           |
| 1435626_a_at | 516.50   | 0.00415  | P | 904.50   | 0.000732 | P | 388.00   | 1.52  | 0.003355 | Herpud1                                                                                             | homocysteine-inducible, endoplasmic reticulum stress-inducible, ubiquitin-like domain member 1 |
| 1436995_a_at | 12491.50 | 0.000244 | P | 16386.60 | 0.000244 | P | 3895.10  | 1.52  | 0.001077 | Rpi26                                                                                               | ribosomal protein L26                                                                          |
| 1438391_x_at | 370.50   | 0.01416  | P | 527.90   | 0.001221 | P | 157.40   | 1.52  | 0.002753 | Hsd17b10                                                                                            | hydroxyacyl-Coenzyme A dehydrogenase type II                                                   |
| 1448306_at   | 1164.00  | 0.000244 | P | 1838.80  | 0.000244 | P | 675.80   | 1.52  | 0.000865 | Nrkbia                                                                                              | nuclear factor of kappa light chain gene enhancer in B-cells                                   |
| 1448864_a_at | 1020.50  | 0.000732 | P | 1344.50  | 0.000244 | P | 324.00   | 1.52  | 0.001486 | Smrk                                                                                                | inhibitor, alpha                                                                               |
| 1448881_at   | 2799.70  | 0.000244 | P | 4473.30  | 0.000244 | P | 1673.60  | 1.52  | 0.00002  | Hp                                                                                                  | SNF related kinase                                                                             |
| 1450395_at   | 553.20   | 0.000244 | P | 818.40   | 0.000732 | P | 262.50   | 1.52  | 0.000966 | Slc22a5                                                                                             | haploglobin                                                                                    |
| 1450958_at   | 7067.90  | 0.000244 | P | 11916.20 | 0.000244 | P | 4848.30  | 1.52  | 0.00002  | Tm4sf1                                                                                              | solute carrier family 22 (organic cation transporter), member 5                                |
| 1451096_at   | 2422.10  | 0.000244 | P | 4189.00  | 0.000244 | P | 1786.90  | 1.52  | 0.000035 | Ndufs2                                                                                              | transmembrane 4 superfamily member 1                                                           |
| 1451295_at   | 337.30   | 0.001953 | P | 498.00   | 0.000244 | P | 160.70   | 1.52  | 0.000035 | Ndufs2                                                                                              | NADH dehydrogenase (ubiquinone) Fe-S protein 2                                                 |
| 1451355_at   | 362.20   | 0.00415  | P | 642.40   | 0.001221 | P | 280.20   | 1.52  | 0.001486 | Asah3                                                                                               | apigenin                                                                                       |
| 1452206_at   | 4872.10  | 0.000732 | P | 6647.00  | 0.000244 | P | 1774.90  | 1.52  | 0.001077 | Sucl2a                                                                                              | cancer related gene-liver 1                                                                    |
| 1452535_x_at | 4120.70  | 0.000244 | P | 6106.00  | 0.001221 | P | 1985.30  | 1.52  | 0.001077 | Sucl2a                                                                                              | succinate-Coenzyme A ligase, ADP-forming, beta subunit                                         |
| 1460367_at   | 1135.30  | 0.000244 | P | 1759.10  | 0.000244 | P | 623.80   | 1.52  | 0.000023 | Hsp1                                                                                                | lactate dehydrogenase 2, B chain                                                               |
| 1416039_x_at | 828.60   | 0.018555 | P | 466.50   | 0.030293 | P | 381.50   | 1.52  | 0.001336 | Cy61                                                                                                | RIKEN cDNA 1700580U05 gene                                                                     |
| 1416204_at   | 3618.30  | 0.000244 | P | 2363.20  | 0.000732 | P | -1255.10 | -1.52 | 0.000966 | Gp41                                                                                                | cysteine rich protein 61                                                                       |
| 1416357_a_at | 902.00   | 0.000244 | P | 445.40   | 0.01416  | P | -456.60  | -1.52 | 0.000774 | Mcam                                                                                                | glycerol-3-phosphate dehydrogenase 1 (soluble)                                                 |
| 1416762_at   | 2051.00  | 0.000244 | P | 1750.80  | 0.000732 | P | -300.20  | -1.52 | 0.000692 | S100a10                                                                                             | melanoma cell adhesion molecule                                                                |
| 1418953_at   | 6556.90  | 0.000244 | P | 4550.90  | 0.000244 | P | -2006.00 | -1.52 | 0.000130 | Ctgf                                                                                                | S100 calcium binding protein A10 (calpactin)                                                   |
| 1417001_a_at | 633.10   | 0.00293  | P | 421.20   | 0.005859 | P | -211.90  | -1.52 | 0.002490 | D4Wsu53e                                                                                            | connective tissue growth factor                                                                |
| 1417004_at   | 571.50   | 0.00415  | P | 236.50   | 0.095215 | P | -335.00  | -1.52 | 0.002250 | Tsp101                                                                                              | DNA segment, Chr 4, Wayne State University 53, expressed                                       |
| 1417403_at   | 1488.90  | 0.000244 | P | 877.00   | 0.000732 | P | -611.90  | -1.52 | 0.001077 | Elovl6                                                                                              | tumor susceptibility gene 101                                                                  |
| 1417466_at   | 6507.10  | 0.000244 | P | 4000.60  | 0.000244 | P | -2506.50 | -1.52 | 0.004073 | ---                                                                                                 | long chain fatty acyl elongase                                                                 |
| 1418511_at   | 2421.90  | 0.000244 | P | 1904.60  | 0.000244 | P | -517.30  | -1.52 | 0.000078 | Dpt                                                                                                 | regulator of G-protein signaling 5                                                             |
| 1420613_at   | 6465.20  | 0.000244 | P | 3827.90  | 0.000244 | P | -2640.30 | -1.52 | 0.000770 | Ptp4a2                                                                                              | dermatopontin                                                                                  |
| 1420854_at   | 813.40   | 0.000732 | P | 450.60   | 0.001953 | P | -867.90  | -1.52 | 0.001077 | Ptp4a2                                                                                              | protein tyrosine phosphatase 4a2                                                               |
| 1420855_at   | 7535.10  | 0.000244 | P | 4801.90  | 0.000244 | P | -2733.20 | -1.52 | 0.000520 | Ein                                                                                                 | elastin                                                                                        |
| 1421754_at   | 2220.90  | 0.000244 | P | 1344.30  | 0.001221 | P | -876.60  | -1.52 | 0.000300 | Ay036118                                                                                            | elastin                                                                                        |
| 1422962_a_at | 310.70   | 0.00415  | P | 166.60   | 0.001953 | P | -144.10  | -1.52 | 0.000438 | Psmb8                                                                                               | proteasome (prosome, macropain) subunit, beta type 8 (large multifunctional protease 7)        |
| 1423090_x_at | 1686.10  | 0.001953 | P | 1254.50  | 0.005859 | P | -411.60  | -1.52 | 0.000460 | Sec51a                                                                                              | SEC51, gamma subunit (S. cerevisiae)                                                           |
| 1423110_at   | 3858.90  | 0.000244 | P | 2220.50  | 0.000244 | P | -1638.40 | -1.52 | 0.002753 |                                                                                                     |                                                                                                |

|              |          |          |   |          |          |   |           |       |           |               |                                                                                                                                                                                     |
|--------------|----------|----------|---|----------|----------|---|-----------|-------|-----------|---------------|-------------------------------------------------------------------------------------------------------------------------------------------------------------------------------------|
| 1419589_at   | 822.40   | 0.000244 | P | 420.70   | 0.000244 | P | -401.70   | -1.62 | 0.0002700 | Cd93          | complement component 1, q subcomponent, receptor 1                                                                                                                                  |
| 1420745_a_at | 565.60   | 0.000732 | P | 323.30   | 0.001953 | P | -242.30   | -1.62 | 0.0004480 | Condbp1       | maternal inhibition of differentiation                                                                                                                                              |
| 1420879_a_at | 606.80   | 0.000732 | P | 282.80   | 0.005859 | P | -324.00   | -1.62 | 0.0004920 | Ywhab         | tyrosine 3-mono-oxygenase/tryptophan 5-mono-oxygenase activation protein, beta polypeptide                                                                                          |
| 1423689_at   | 2756.00  | 0.000244 | P | 1811.30  | 0.001953 | P | -944.70   | -1.62 | 0.0002300 | Col1a1        | procollagen, type I, alpha 1                                                                                                                                                        |
| 1424112_at   | 728.90   | 0.000732 | P | 525.30   | 0.000732 | P | -203.60   | -1.62 | 0.0004480 | Igf2r         | insulin-like growth factor 2 receptor                                                                                                                                               |
| 1425993_a_at | 792.80   | 0.001953 | P | 428.30   | 0.00415  | P | -364.50   | -1.62 | 0.0002090 | Hsp110        | heat shock protein                                                                                                                                                                  |
| 1426599_a_at | 349.50   | 0.00415  | P | 164.60   | 0.111572 | A | -184.90   | -1.62 | 0.0024900 | Slc2a1        | solute carrier family 2 (facilitated glucose transporter), member 1                                                                                                                 |
| 1427153_at   | 1518.80  | 0.000244 | P | 900.00   | 0.001953 | P | -618.80   | -1.62 | 0.0001470 | Bckdhb        | branched chain ketoadid dehydrogenase E1, beta polypeptide                                                                                                                          |
| 1427201_at   | 2316.90  | 0.000732 | P | 1472.00  | 0.000732 | P | -844.90   | -1.62 | 0.0002410 | Mustn1        | RIKEN cDNA 1110028G01 gene                                                                                                                                                          |
| 1427833_a_at | 10433.10 | 0.000244 | P | 7023.40  | 0.000244 | P | -3409.70  | -1.62 | 0.0000520 | Col3a1        | procollagen, type I, alpha 1                                                                                                                                                        |
| 1433806_x_at | 928.30   | 0.000244 | P | 591.40   | 0.00415  | P | -336.90   | -1.62 | 0.0001470 | Calr          | calreticulin                                                                                                                                                                        |
| 1434881_s_at | 473.00   | 0.000244 | P | 328.10   | 0.018555 | P | -144.90   | -1.62 | 0.0027530 | Kctd12        | Mus musculus 2 days pregnant adult female ovary cDNA, RIKEN full-length enriched library, clone.E330037P08 product:inferred: KIAA1317 protein (Homo sapiens), full insert sequence. |
| 1436902_x_at | 2688.00  | 0.000244 | P | 1584.30  | 0.000244 | P | -1103.70  | -1.62 | 0.0000600 | Tmsb10        | thymosin, beta 10                                                                                                                                                                   |
| 1437608_x_at | 405.50   | 0.005859 | P | 189.40   | 0.080566 | A | -216.10   | -1.62 | 0.0020320 | Ywhaq         | tyrosine 3-mono-oxygenase/tryptophan 5-mono-oxygenase activation protein, theta polypeptide                                                                                         |
| 1438133_a_at | 409.30   | 0.00293  | P | 153.30   | 0.005859 | P | -256.00   | -1.62 | 0.0022500 | Cyr61         | cysteine rich protein 61                                                                                                                                                            |
| 1439364_a_at | 517.90   | 0.023926 | P | 287.40   | 0.129639 | P | -230.50   | -1.62 | 0.0003890 | Mmp2          | matrix metalloproteinase 2                                                                                                                                                          |
| 1448201_at   | 681.30   | 0.000732 | P | 413.90   | 0.000244 | P | -267.40   | -1.62 | 0.0030410 | Sfrp2         | secreted frizzled-related sequence protein 2                                                                                                                                        |
| 1448698_at   | 251.30   | 0.005859 | P | 122.90   | 0.111572 | A | -128.40   | -1.62 | 0.0014860 | Ccnm1         | cyclin D1                                                                                                                                                                           |
| 1450967_at   | 1080.40  | 0.000732 | P | 496.00   | 0.000732 | P | -584.40   | -1.62 | 0.0024900 | Ptp4a2        | RIKEN cDNA 4933428I03 gene                                                                                                                                                          |
| 1452114_s_at | 2470.20  | 0.000244 | P | 1499.80  | 0.001953 | P | -970.40   | -1.62 | 0.0000200 | Igfbp5        | insulin-like growth factor binding protein 5                                                                                                                                        |
| 1452997_at   | 1200.10  | 0.000244 | P | 775.10   | 0.001953 | P | -425.00   | -1.62 | 0.0000300 | 6820431F20Rik | cadherin 11                                                                                                                                                                         |
| 1453473_a_at | 860.80   | 0.00293  | P | 553.80   | 0.010742 | P | -307.00   | -1.62 | 0.0013360 | LOC671261     | Dynl1t //                                                                                                                                                                           |
| 1455815_a_at | 2976.90  | 0.000244 | P | 1885.60  | 0.000244 | P | -1091.30  | -1.62 | 0.0001140 | Ywhab         | t-complex testis expressed 1                                                                                                                                                        |
| 1415834_at   | 475.70   | 0.000732 | P | 257.50   | 0.00415  | P | -218.20   | -1.74 | 0.0033550 | Dusp6         | tyrosine 3-mono-oxygenase/tryptophan 5-mono-oxygenase activation protein, beta polypeptide                                                                                          |
| 1417430_at   | 659.70   | 0.001953 | P | 364.70   | 0.017578 | P | -295.00   | -1.74 | 0.0006180 | Cdr2          | dual specificity phosphatase 6                                                                                                                                                      |
| 1417730_at   | 866.60   | 0.001221 | P | 406.70   | 0.000577 | P | -479.90   | -1.74 | 0.0000450 | Exi1          | cerebellar degeneration-related 2                                                                                                                                                   |
| 1418377_a_at | 395.00   | 0.023926 | P | 245.10   | 0.080566 | A | -149.90   | -1.74 | 0.0003700 | Sya1          | exocytosis (multiple) 1                                                                                                                                                             |
| 1418435_at   | 404.00   | 0.00415  | P | 253.00   | 0.018555 | P | -151.00   | -1.74 | 0.0013360 | Mkm1          | Cd27 binding protein (Hindu God of destruction)                                                                                                                                     |
| 1419641_at   | 417.40   | 0.001953 | P | 200.20   | 0.056152 | M | -217.20   | -1.74 | 0.0016510 | Purb          | makorin, ring finger protein, 1                                                                                                                                                     |
| 1421816_at   | 698.10   | 0.008057 | P | 307.80   | 0.030273 | P | -390.30   | -1.74 | 0.0022500 | LOC630729     | purine rich element binding protein B                                                                                                                                               |
| 1423889_at   | 468.10   | 0.000732 | P | 237.80   | 0.008057 | P | -230.30   | -1.74 | 0.0003890 | E6434402      | glutathione reductase 1                                                                                                                                                             |
| 1424010_at   | 2494.10  | 0.000244 | P | 1035.90  | 0.005859 | P | -1458.20  | -1.74 | 0.0002000 | Mfap4         | Mus musculus, clone MGC:5739 IMAGE:3481870, mRNA, complete cds                                                                                                                      |
| 1424176_a_at | 429.10   | 0.001953 | P | 206.00   | 0.067627 | A | -223.10   | -1.74 | 0.0001470 | Anxa4         | RIKEN cDNA 1110007F23 gene                                                                                                                                                          |
| 1424214_at   | 867.80   | 0.023926 | P | 401.90   | 0.111572 | A | -465.90   | -1.74 | 0.0018320 | 9130219B05Rik | annexin A4                                                                                                                                                                          |
| 1425937_a_at | 935.60   | 0.000244 | P | 277.70   | 0.001953 | P | -657.90   | -1.74 | 0.0000380 | Hesm1         | similar to DKFPZ564O0823 protein                                                                                                                                                    |
| 1426662_at   | 411.90   | 0.000732 | P | 252.30   | 0.001953 | P | -159.60   | -1.74 | 0.0006920 | Cmas          | cardiac lineage protein 1                                                                                                                                                           |
| 1435222_at   | 603.70   | 0.000244 | P | 421.90   | 0.001221 | P | -181.80   | -1.74 | 0.0001300 | Foxp1         | cytidine monophospho-N-acetylneuraminic acid synthetase                                                                                                                             |
| 1436584_a_at | 452.30   | 0.000244 | P | 280.20   | 0.001953 | P | -172.10   | -1.74 | 0.0027530 | Spry2         | forkhead box P1                                                                                                                                                                     |
| 1448992_at   | 1006.20  | 0.000732 | P | 418.10   | 0.00415  | P | -588.10   | -1.74 | 0.0001890 | Crtap         | sprouty homolog 2 (Drosophila)                                                                                                                                                      |
| 1449379_at   | 629.50   | 0.00293  | P | 266.00   | 0.001953 | P | -363.50   | -1.74 | 0.0001650 | Kdr           | cartilage associated protein                                                                                                                                                        |
| 1449525_at   | 686.20   | 0.000244 | P | 421.10   | 0.00415  | P | -265.10   | -1.74 | 0.0004380 | Fmo3          | kinasin insert domain protein receptor                                                                                                                                              |
| 1452352_at   | 331.60   | 0.000244 | P | 209.50   | 0.00293  | P | -122.10   | -1.74 | 0.0002140 | Cla2b         | flavin containing mono-oxygenase 3                                                                                                                                                  |
| 1456170_x_at | 1928.60  | 0.00415  | P | 611.10   | 0.001221 | P | -1317.50  | -1.74 | 0.0006920 | Calr          | cytotoxic T lymphocyte-associated protein 2 beta                                                                                                                                    |
| 1460239_at   | 736.40   | 0.001221 | P | 386.60   | 0.000732 | P | -349.80   | -1.74 | 0.0002410 | Tspan13       | calreticulin                                                                                                                                                                        |
| 1460687_at   | 442.70   | 0.001953 | P | 245.80   | 0.028564 | P | -196.90   | -1.74 | 0.0018320 | Setd8         | RIKEN cDNA 1100001123 gene                                                                                                                                                          |
| 1415801_at   | 713.90   | 0.000244 | P | 423.30   | 0.000732 | P | -290.60   | -1.87 | 0.0001670 | Gsp1          | RIKEN cDNA 2410195B05 gene                                                                                                                                                          |
| 1416388_at   | 756.00   | 0.000244 | P | 558.80   | 0.001953 | P | -197.20   | -1.87 | 0.0012010 | Gsta4         | gap junction membrane channel protein alpha 1                                                                                                                                       |
| 1416407_at   | 841.10   | 0.000244 | P | 355.40   | 0.001221 | P | -485.70   | -1.87 | 0.0000400 | Pea15a        | glutathione S-transferase, alpha 4                                                                                                                                                  |
| 1417065_at   | 1188.00  | 0.000244 | P | 505.90   | 0.000244 | P | -632.10   | -1.87 | 0.0006920 | Egr1          | phosphoprotein enriched in astrocytes 15                                                                                                                                            |
| 1417780_at   | 207.30   | 0.00293  | P | 107.10   | 0.274117 | A | -100.20   | -1.87 | 0.0003070 | Laas4         | early growth response 1                                                                                                                                                             |
| 1418571_at   | 1435.80  | 0.001953 | P | 695.00   | 0.030273 | P | -740.80   | -1.87 | 0.0000200 | Tnfrsf12a     | RIKEN cDNA 2900019C14 gene                                                                                                                                                          |
| 1419667_at   | 602.90   | 0.001953 | P | 283.10   | 0.000244 | P | -319.80   | -1.87 | 0.0009660 | Sgcb          | tumor necrosis factor receptor superfamily, member 12a                                                                                                                              |
| 1420338_at   | 209.10   | 0.010742 | P | 63.80    | 0.432373 | A | -145.30   | -1.87 | 0.0027530 | Alox15        | sarcoglycan, beta (43KD dystrophin-associated glycoprotein)                                                                                                                         |
| 1420612_s_at | 413.80   | 0.000732 | P | 253.20   | 0.037598 | P | -160.60   | -1.87 | 0.0020320 | Ptp4a2        | archidonate 15-lipoxygenase                                                                                                                                                         |
| 1420622_a_at | 465.20   | 0.001953 | P | 123.70   | 0.111572 | A | -341.50   | -1.87 | 0.0036990 | LOC669493     | protein tyrosine phosphatase 4a2                                                                                                                                                    |
| 1420878_a_at | 466.00   | 0.001953 | P | 213.30   | 0.067627 | A | -252.70   | -1.87 | 0.0024900 | Ywhab         | EG666904 //                                                                                                                                                                         |
| 1423104_at   | 459.70   | 0.00293  | P | 225.80   | 0.00293  | P | -233.90   | -1.87 | 0.0022500 | Ywhab         | Hsp40 //                                                                                                                                                                            |
| 1423619_at   | 1029.80  | 0.001221 | P | 669.20   | 0.000244 | P | -360.60   | -1.87 | 0.0016510 | Rasd1         | LOC621284 //                                                                                                                                                                        |
| 1425927_a_at | 615.10   | 0.001953 | P | 290.30   | 0.010742 | P | -324.80   | -1.87 | 0.0006800 | Atf5          | heat shock protein 8                                                                                                                                                                |
| 1426890_a_at | 1316.70  | 0.000244 | P | 799.80   | 0.000244 | P | -516.90   | -1.87 | 0.0000200 | Sreb1         | tyrosine 3-mono-oxygenase/tryptophan 5-mono-oxygenase activation protein, beta polypeptide                                                                                          |
| 1427256_at   | 374.80   | 0.000244 | P | 192.60   | 0.018555 | P | -182.20   | -1.87 | 0.0000300 | Vcan          | insulin receptor substrate 1                                                                                                                                                        |
| 1428196_a_at | 1612.90  | 0.001221 | P | 753.30   | 0.001221 | P | -859.60   | -1.87 | 0.0000230 | 1200015F23Rik | RAS, dexamethasone-induced 1                                                                                                                                                        |
| 1431609_a_at | 636.50   | 0.001221 | P | 370.40   | 0.010742 | P | -266.10   | -1.87 | 0.0016510 | Acp5          | activating transcription factor 5                                                                                                                                                   |
| 1433860_at   | 311.60   | 0.010742 | P | 163.80   | 0.149658 | A | -147.80   | -1.87 | 0.0020320 | 6030458C11Rik | sterol regulatory element binding factor 1                                                                                                                                          |
| 1434256_s_at | 351.00   | 0.010742 | P | 119.10   | 0.149658 | A | -231.90   | -1.87 | 0.0016510 | Cds2          | chondroitin sulfate proteoglycan 2                                                                                                                                                  |
| 1452318_a_at | 649.40   | 0.023926 | P | 239.80   | 0.149658 | A | -409.60   | -1.87 | 0.0001300 | Hspa1b        | CDP-diacylglycerol synthase (phosphatidate cytidylyltransferase) 2                                                                                                                  |
| 1452757_s_at | 61224.30 | 0.000244 | P | 32447.80 | 0.000244 | P | -28776.50 | -1.87 | 0.0000200 | Hba-a1        | heat shock protein 1B                                                                                                                                                               |
| 1454712_at   | 1099.90  | 0.000732 | P | 561.90   | 0.001221 | P | -538.00   | -1.87 | 0.0006920 | Mcart1        | hemoglobin, alpha, adult chain 1                                                                                                                                                    |
| 1455271_at   | 860.70   | 0.046143 | P | 219.20   | 0.095215 | A | -641.50   | -1.87 | 0.0033550 | LOC620695     | hypothetical protein D130005A03                                                                                                                                                     |
| 1456424_s_at | 748.30   | 0.00415  | P | 545.30   | 0.046143 | P | -203.00   | -1.87 | 0.0000350 | Ptp           | RIKEN cDNA 1500011J06 gene                                                                                                                                                          |
| 1460285_at   | 683.70   | 0.000732 | P | 313.40   | 0.018555 | P | -352.30   | -1.87 | 0.0006920 | Igfa9         | phospholipid transfer protein                                                                                                                                                       |
| 1460707_at   | 1263.00  | 0.000732 | P | 717.00   | 0.000244 | P | -546.00   | -1.87 | 0.0014860 | Ptp4a2        | integrin alpha 9                                                                                                                                                                    |
| 1417409_at   | 784.20   | 0.000244 | P | 429.20   | 0.000732 | P | -355.00   | -2.00 | 0.0006920 | Jun           | protein tyrosine phosphatase 4a2                                                                                                                                                    |
| 1418699_s_at | 2439.80  | 0.000732 | P | 1383.80  | 0.001953 | P | -1056.00  | -2.00 | 0.0000300 | Fech          | Jun oncogene                                                                                                                                                                        |
| 1419043_a_at | 965.80   | 0.000244 | P | 687.40   | 0.001953 | P | -278.40   | -2.00 | 0.0000400 | Igfp1         | ferrochelatase                                                                                                                                                                      |
| 1425914_a_at | 221.10   | 0.000732 | P | 101.80   | 0.246094 | A | -119.30   | -2.00 | 0.0040730 | Armcx1        | interferon-inducible GTPase                                                                                                                                                         |
| 1426063_a_at | 194.50   | 0.018555 | P | 88.30    | 0.19458  | A | -106.20   | -2.00 | 0.0022500 | Gem           | RIKEN cDNA 3011003I09 gene                                                                                                                                                          |
| 1426899_at   | 300.80   | 0.001221 | P | 156.80   | 0.111572 | A | -144.00   | -2.00 | 0.0013360 | Tbc1d23       | GTP binding protein (gene overexpressed in skeletal muscle)                                                                                                                         |
| 1428116_a_at | 2330.00  | 0.000732 | P | 1197.30  | 0.000244 | P | -1132.70  | -2.00 | 0.0000300 | Dynl1t        | RIKEN cDNA 1110018J12 gene                                                                                                                                                          |
| 1428655_at   | 440.20   | 0.00293  | P | 170.20   | 0.171387 | A | -270.00   | -2.00 | 0.0004920 | Ccdc128       | RIKEN cDNA 4930451A13 gene                                                                                                                                                          |
| 1429078_a_at | 311.00   | 0.00293  | P | 121.80   | 0.274117 | A | -189.20   | -2.00 | 0.0020320 | Cops7a        | COP9 (constitutive photomorphogenic) homolog, subunit 7a (Arabidopsis thaliana)                                                                                                     |
| 1437165_a_at | 982.20   | 0.000732 | P | 497.20   | 0.008057 | P | -485.00   | -2.00 | 0.0000520 | Pcolce        | procollagen C-proteinase enhancer protein                                                                                                                                           |
| 1437211_x_at | 1847.00  | 0.000244 | P | 864.70   |          |   |           |       |           |               |                                                                                                                                                                                     |

|              |          |            |         |            |   |           |       |            |               |                                                                                     |
|--------------|----------|------------|---------|------------|---|-----------|-------|------------|---------------|-------------------------------------------------------------------------------------|
| 1418118_at   | 301.90   | 0.018555 P | 131.80  | 0.080566   | A | -169.60   | -2.30 | 0.00369900 | Sic22a1       | solute carrier family 22 (organic cation transporter), member 1                     |
| 1418572_x_at | 1107.90  | 0.001953 P | 533.80  | 0.004415   | P | -574.10   | -2.30 | 0.00027300 | Tnfrsf12a     | tumor necrosis factor receptor superfamily, member 12a                              |
| 1419469_at   | 360.40   | 0.00293 P  | 143.60  | 0.030273   | P | -216.80   | -2.30 | 0.00165100 | Gnb4          | guanine nucleotide binding protein, beta 4                                          |
| 1423607_at   | 612.30   | 0.000244 P | 612.30  | 0.000244   | P | -741.40   | -2.30 | 0.00014700 | Pcolce        | luciferase                                                                          |
| 1427110_at   | 276.40   | 0.00415 P  | 100.60  | 0.366211   | A | -175.80   | -2.30 | 0.00148600 | Raver1        | RIKEN cDNA E13010317 gene                                                           |
| 1427341_at   | 215.10   | 0.01001 P  | 93.80   | 0.334473   | A | -121.30   | -2.30 | 0.00448100 | Bbs9          | RIKEN cDNA E13010317 gene                                                           |
| 1433859_at   | 162.30   | 0.000732 P | 59.80   | 0.533936   | A | -102.50   | -2.30 | 0.00275300 | D030070L09Rik | RIKEN cDNA D030070L09 gene                                                          |
| 1448119_at   | 707.50   | 0.001524 P | 260.40  | 0.015449   | M | -477.20   | -2.30 | 0.00010100 | Bpgm          | 2,3-bisphosphoglycerate mutase                                                      |
| 1448433_at   | 555.20   | 0.001953 P | 218.40  | 0.005859   | P | -336.80   | -2.30 | 0.00014700 | Pcolce        | procollagen C-proteinase enhancer protein                                           |
| 1450179_at   | 993.10   | 0.000732 P | 409.10  | 0.010742   | P | -584.00   | -2.30 | 0.00002000 | Sost          | sclerostin                                                                          |
| 1452483_a_at | 287.90   | 0.023926 P | 131.20  | 0.398926   | A | -156.70   | -2.30 | 0.00275300 | Cd44          | CD44 antigen                                                                        |
| 1456388_at   | 183.70   | 0.01416 P  | 69.70   | 0.239258   | A | -114.00   | -2.30 | 0.00335500 | Atp11a        | RIKEN cDNA 4930558F19 gene                                                          |
| 1415505_at   | 2143.40  | 0.020266 P | 823.10  | 0.000244   | P | -1320.30  | -2.46 | 0.00077400 | Nha1          | nuclear receptor subfamily 4, group A, member 1                                     |
| 1417379_at   | 319.90   | 0.002344 P | 104.80  | 0.000732   | P | -2105.50  | -2.46 | 0.00020000 | Igfp1         | Ig motif containing GTPase activating protein 1                                     |
| 1417552_at   | 184.50   | 0.030273 P | 42.20   | 0.398926   | A | -142.30   | -2.46 | 0.00448100 | Fap           | fibroblast activating protein                                                       |
| 1421254_a_at | 989.70   | 0.001953 P | 551.20  | 0.004415   | P | -438.50   | -2.46 | 0.00018900 | Sgcp          | sarcoglycan, gamma (35kD dystrophin-associated glycoprotein)                        |
| 1422473_at   | 515.00   | 0.001953 P | 217.30  | 0.004415   | P | -297.70   | -2.46 | 0.00016700 | Pde4b         | phosphodiesterase 4B, cAMP specific                                                 |
| 1423100_at   | 554.40   | 0.001953 P | 208.70  | 0.01416 P  | P | -345.70   | -2.46 | 0.00021400 | Fos           | FBJ osteosarcoma oncogene                                                           |
| 1424108_at   | 1252.30  | 0.000244 P | 593.20  | 0.001221   | P | -659.10   | -2.46 | 0.00004000 | Glo1          | RIKEN cDNA 1110008E19 gene                                                          |
| 1424650_at   | 343.60   | 0.018555 P | 167.70  | 0.129639   | A | -175.90   | -2.46 | 0.00165100 | Pdia5         | protein disulfide isomerase-related                                                 |
| 1426225_at   | 3008.80  | 0.000244 P | 1165.70 | 0.000244   | P | -1843.10  | -2.46 | 0.00002300 | Rbp4          | retinol binding protein 4, plasma                                                   |
| 1427820_at   | 660.10   | 0.023926 P | 252.70  | 0.056152   | M | -407.40   | -2.46 | 0.00203200 | ---           | Mus musculus, clone IMAGE:3983821, mRNA, partial cds                                |
| 1434328_at   | 610.30   | 0.000244 P | 255.70  | 0.000244 P | P | -351.60   | -2.46 | 0.00013000 | Pip4f15       | RIKEN cDNA 251008907 gene                                                           |
| 1435129_at   | 2749.60  | 0.000244 P | 1347.30 | 0.000244   | P | -1402.30  | -2.46 | 0.00002000 | Pip4a2        | protein tyrosine phosphatase 4a2                                                    |
| 1437612_at   | 180.10   | 0.018555 P | 59.30   | 0.696289   | A | -120.80   | -2.46 | 0.00407300 | Nup62         | nucleoporin 62                                                                      |
| 1448188_at   | 1097.00  | 0.000244 P | 635.20  | 0.00293    | P | -561.80   | -2.46 | 0.00002300 | Ucp2          | uncoupling protein 2, mitochondrial                                                 |
| 1452276_at   | 189.90   | 0.000244 P | 67.10   | 0.219482   | A | -122.80   | -2.46 | 0.00069200 | Smarcaad1     | enhancer trap locus 1                                                               |
| 1455316_x_at | 16883.40 | 0.000244 P | 5248.20 | 0.000244   | P | -11635.20 | -2.46 | 0.00002000 | 00073624      | ENSMUSG000                                                                          |
| 1415971_at   | 704.00   | 0.000732 P | 237.80  | 0.000244   | P | -466.20   | -2.64 | 0.00049200 | Marcks        | myristoylated alanine rich protein kinase C substrate                               |
| 1416658_at   | 441.70   | 0.00293 P  | 165.10  | 0.080566   | A | -276.60   | -2.64 | 0.00004600 | Frzb          | frizzled-related protein                                                            |
| 1417648_s_at | 345.30   | 0.001953 P | 116.00  | 0.111572   | A | -229.30   | -2.64 | 0.00133600 | Srx5          | sorling nexin 5                                                                     |
| 1419494_a_at | 265.96   | 0.002344 P | 111.30  | 0.149859   | A | -174.60   | -2.64 | 0.00027500 | Tpa52         | tumor protein D52                                                                   |
| 1420444_at   | 432.70   | 0.005859 P | 170.40  | 0.023926   | P | -282.30   | -2.64 | 0.00069200 | Sic22a3       | solute carrier family 22 (organic cation transporter), member 3                     |
| 1422654_at   | 493.20   | 0.030273 P | 151.70  | 0.274117   | A | -341.50   | -2.64 | 0.00448100 | Sgca          | sarcoglycan, alpha (50kDa dystrophin-associated glycoprotein)                       |
| 1424109_a_at | 1544.30  | 0.000244 P | 437.80  | 0.00293    | P | -1105.50  | -2.64 | 0.00002000 | Glo1          | RIKEN cDNA 1110008E19 gene                                                          |
| 1424613_at   | 669.30   | 0.010742 P | 177.60  | 0.067627   | A | -491.70   | -2.64 | 0.00069200 | Gprc5b        | G protein-coupled receptor, family C, group 5, member B                             |
| 1429040_at   | 409.30   | 0.01416 P  | 118.80  | 0.398926   | A | -290.50   | -2.64 | 0.00086500 | 6820431F20Rik | cadherin 11                                                                         |
| 1448424_at   | 407.90   | 0.00415 P  | 130.70  | 0.023926   | P | -277.20   | -2.64 | 0.00049200 | Frzb          | frizzled-related protein                                                            |
| 1449088_at   | 279.50   | 0.000244 P | 105.10  | 0.366211   | A | -174.40   | -2.64 | 0.00006000 | Fbp2          | fructose biphosphatase 2                                                            |
| 1449181_at   | 230.80   | 0.001953 P | 96.10   | 0.149858   | A | -134.70   | -2.64 | 0.00086500 | Fech          | ferrochelatase                                                                      |
| 1449363_at   | 421.80   | 0.000244 P | 128.40  | 0.095215   | A | -293.20   | -2.64 | 0.00034600 | Afp3          | activating transcription factor 3                                                   |
| 1417893_at   | 308.90   | 0.001953 P | 94.80   | 0.11387    | A | -200.10   | -2.83 | 0.00035100 | Skm3          | skidoxin 3                                                                          |
| 1420841_at   | 190.40   | 0.001221 P | 64.40   | 0.366211   | A | -126.00   | -2.83 | 0.00107700 | Ptprf         | protein tyrosine phosphatase, receptor type, F                                      |
| 1448752_at   | 577.40   | 0.000244 P | 197.10  | 0.046143   | P | -380.30   | -2.83 | 0.00002000 | Car2          | carbonic anhydrase 2                                                                |
| 1415865_s_at | 480.00   | 0.00293 P  | 238.00  | 0.095215   | A | -242.00   | -3.03 | 0.00016700 | Bpgm          | 2,3-bisphosphoglycerate mutase                                                      |
| 1417750_a_at | 465.40   | 0.001953 P | 184.10  | 0.171387   | A | -281.30   | -3.03 | 0.00004000 | Sic25a37      | mitochondrial solute carrier protein                                                |
| 1419301_at   | 2220.00  | 0.000732 P | 672.50  | 0.000732   | P | -1165.10  | -3.03 | 0.00014700 | Fzd4          | frizzled homolog 4 (Discoless)                                                      |
| 1425944_at   | 493.90   | 0.000244 P | 221.50  | 0.010742   | P | -272.40   | -3.03 | 0.00003000 | Mrgprf        | cDNA sequence BC019111                                                              |
| 1448890_at   | 2256.70  | 0.000244 P | 675.50  | 0.000732   | P | -1581.20  | -3.03 | 0.00002000 | Klf2          | Kruppel-like factor 2 (lung)                                                        |
| 1449461_at   | 1061.60  | 0.000732 P | 278.80  | 0.095215   | A | -782.80   | -3.03 | 0.00002000 | Rbp7          | retinol binding protein 7, cellular                                                 |
| 1449856_at   | 277.60   | 0.001221 P | 83.10   | 0.018555   | P | -194.50   | -3.03 | 0.00021400 | Rgs18         | regulator of G-protein signaling 18                                                 |
| 1450521_at   | 306.30   | 0.000732 P | 141.70  | 0.149859   | A | -164.60   | -3.03 | 0.00021400 | Gabbr1        | gamma-aminobutyric acid (GABA-B) receptor, 1                                        |
| 1416593_at   | 322.00   | 0.046143 P | 105.90  | 0.219482   | A | -226.10   | -3.25 | 0.00005200 | Gtrx          | glutaredoxin 1 (thioltransferase)                                                   |
| 1417788_at   | 504.90   | 0.000732 P | 124.70  | 0.067627   | A | -380.20   | -3.25 | 0.00055200 | Snog          | synuclein, gamma                                                                    |
| 1437523_s_at | 317.90   | 0.01416 P  | 61.30   | 0.246094   | A | -256.60   | -3.25 | 0.00034600 | Sgcp          | sarcoglycan, gamma (35kD dystrophin-associated glycoprotein)                        |
| 1449254_at   | 352.20   | 0.01416 P  | 64.30   | 0.529635   | A | -287.90   | -3.25 | 0.00007800 | Spp1          | secreted phosphoprotein 1                                                           |
| 1463695_at   | 328.90   | 0.018555 P | 102.60  | 0.334473   | A | -226.30   | -3.25 | 0.00035500 | Tmm17b        | translocator of inner mitochondrial membrane 17 kDa, b                              |
| 1423450_a_at | 291.40   | 0.001221 P | 78.50   | 0.432373   | A | -212.90   | -3.48 | 0.00016700 | Hs3t1         | heparan sulfate (glucosamine) 3-O-sulfotransferase 1                                |
| 1449466_at   | 524.40   | 0.005859 P | 120.30  | 0.466064   | A | -404.10   | -3.48 | 0.00007800 | Clec3b        | tetranectin (plasminogen binding protein)                                           |
| 1415864_at   | 212.10   | 0.043701 P | 53.50   | 0.334473   | A | -158.60   | -3.73 | 0.00055200 | Bpgm          | 2,3-bisphosphoglycerate                                                             |
| 1418350_at   | 553.60   | 0.000244 P | 138.10  | 0.111572   | A | -415.50   | -3.73 | 0.00002000 | Hbfgf         | diphtheria toxin receptor                                                           |
| 1421008_at   | 205.40   | 0.000244 P | 114.10  | 0.067627   | A | -282.80   | -3.73 | 0.00002000 | Rgs2          | viral hemorrhagic septicemia virus (VHSV) induced gene 1                            |
| 1425156_at   | 256.90   | 0.037598 P | 60.80   | 0.5        | A | -196.10   | -3.73 | 0.00225000 | Gbp6          | RIKEN cDNA 983014724 gene                                                           |
| 1448386_a_at | 356.30   | 0.030273 P | 63.80   | 0.466064   | A | -192.50   | -3.73 | 0.00448100 | Wap           | whycid protein                                                                      |
| 1450175_a_at | 233.10   | 0.001221 P | 65.10   | 0.633789   | A | -168.00   | -3.73 | 0.00448100 | Ctsm          | cathepsin M                                                                         |
| 1418701_at   | 594.00   | 0.000732 P | 112.80  | 0.149858   | A | -481.20   | -4.00 | 0.00002000 | Comt          | RIKEN cDNA D330014B15 gene                                                          |
| 1419694_at   | 641.40   | 0.000732 P | 205.50  | 0.067627   | A | -436.90   | -4.00 | 0.00006000 | Col8          | collumline (C-C motif) ligand 8                                                     |
| 1424337_at   | 195.70   | 0.056152 M | 50.20   | 0.601074   | A | -145.50   | -4.00 | 0.00165100 | Srx15         | RIKEN cDNA 1500032B08 gene                                                          |
| 1424877_a_at | 856.20   | 0.000244 P | 217.80  | 0.001953   | P | -638.40   | -4.00 | 0.00013000 | Alad          | aminolevulinic acid, delta-, dehydratase                                            |
| 1450200_s_at | 166.30   | 0.046143 P | 36.10   | 0.633789   | A | -130.20   | -4.00 | 0.00448100 | Cs2tr21 ///   | colony stimulating factor 2 receptor, beta 1, low-affinity (granulocyte-macrophage) |
| 1451240_a_at | 400.20   | 0.000244 P | 74.60   | 0.171387   | A | -325.60   | -4.00 | 0.00002000 | Glo1          | RIKEN cDNA 1110008E19 gene                                                          |
| 1435039_at   | 231.30   | 0.01416 P  | 47.80   | 0.6527     | A | -182.50   | -4.29 | 0.00055200 | Pip4f1b       | phosphatidylinositol 4-phosphate 5-kinase, type 1 beta                              |
| 1454993_a_at | 241.30   | 0.000732 P | 34.20   | 0.456299   | A | -207.10   | -4.29 | 0.00034600 | Sfrs3         | splicing factor, arginine/serine-rich 3 (SR20)                                      |
| 1455136_at   | 925.60   | 0.000244 P | 265.60  | 0.001953   | P | -660.00   | -4.29 | 0.00002300 | Atp1a2        | Mus musculus, clone IMAGE:1365759, mRNA                                             |
| 1416757_at   | 141.30   | 0.037598 P | 34.30   | 0.633789   | A | -107.00   | -4.59 | 0.00407300 | Zwihc         | RIKEN cDNA Z310031L18 gene                                                          |
| 1417461_at   | 1702.30  | 0.000732 P | 255.60  | 0.018555   | P | -1446.70  | -4.59 | 0.00004000 | Cap1          | adenylyl cyclase-associated CAP protein homolog 1 (S. cerevisiae, S. pombe)         |
| 1418665_at   | 227.40   | 0.01416 P  | 63.30   | 0.398926   | A | -164.10   | -4.59 | 0.00448100 | Impa2         | inositol (myo)-1(or 4)-monophosphatase 2                                            |
| 1426047_a_at | 306.40   | 0.00293 P  | 51.50   | 0.432373   | A | -254.90   | -4.59 | 0.00034600 | Ptpr          | protein tyrosine phosphatase, receptor type, R                                      |
| 1440255_at   | 173.80   | 0.00415 P  | 34.40   | 0.567627   | A | -139.40   | -4.59 | 0.00275300 | Mzf2          | MZF2 (methyl-CpG-binding protein)-interacting zinc finger protein                   |
| 1418493_a_at | 641.40   | 0.000732 P | 130.90  | 0.533936   | A | -436.80   | -4.59 | 0.00039000 | Snca          | synuclein, alpha                                                                    |
| 1419327_at   | 483.20   | 0.001221 P | 78.70   | 0.601074   | A | -404.50   | -4.59 | 0.00006000 | Ptdx1         | expressed sequence AAA15817                                                         |
| 1422178_a_at | 240.50   | 0.023926 P | 76.40   | 0.303711   | A | -164.10   | -5.28 | 0.00133600 | Rab17         | RAB17, member RAS oncogene family                                                   |
| 1424713_at   | 171.00   | 0.010742 P | 26.60   | 0.780518   | A | -144.40   | -5.28 | 0.00055200 | Calm4         | calmodulin-like 4                                                                   |
| 1433532_a_at | 145.30   | 0.030273 P | 10.30   | 0.66527    | A | -135.00   | -5.28 | 0.00165100 | Mbp           | myelin basic protein                                                                |
| 1436058_at   | 282.30   | 0.000244 P | 540.50  | 0.001953   | P | -2421.80  | -5.28 | 0.00004000 | Rgs2          | viral hemorrhagic septicemia virus (VHSV) induced gene 1                            |
| 1418890_a_at | 354.90   | 0.005859 P | 39.20   | 0.633789   | A | -315.70   | -5.66 | 0.00096600 |               |                                                                                     |
